# Supplementary material
Source: publisher figshare collection journal article supplement (https://tandf.figshare.com/ndownloader/files/31585445)

Supplementary Material file

Design, synthesis, and bioactivity investigation of novel benzimidazole derivatives as potent urease inhibitors

Ebrahim Saeedian Moghadam 1, Abdullah Al-Saadi 2, Meysam Talebi 3, Massoud Amanlou 3 , Mohsen Amini 3,* and Raid Abdel-Jalil 1,*

1Department of Chemistry, College of Science, Sultan Qaboos University, Muscat, P.O. Box 36, P.C. 123, Sultanate of Oman

2Department of Crop Sciences, College of Agricultural and Marine Sciences, Sultan Qaboos University, Muscat, Oman

3Department of Medicinal Chemistry, Faculty of Pharmacy and Drug Design and Development Research Center, The Institute of Pharmaceutical Sciences (TIPS), Tehran University of Medical Sciences, Tehran 1417614411, Iran

*Correspondence:

Prof. Mohsen Amini. Department of Medicinal Chemistry, Faculty of Pharmacy and Drug Design and Development Research Center, The Institute of Pharmaceutical Sciences (TIPS), Tehran University of Medical Sciences, Tehran 1417614411, Iran. Tel.: +98-21-6695-9062. Email: [moamini@tums.ac.ir](mailto:moamini@tums.ac.ir)

Dr. Raid Abdel-Jalil. Department of Chemistry, College of Science, Sultan Qaboos University, Muscat, P.O. Box 36, P.C. 123, Sultanate of Oman. Email [jalil@squ.edu.om](mailto:jalil@squ.edu.om)

Content:

1. General procedure for the synthesis of intermediates and target compounds besides spectroscopic analysis
2. Copies of 1H-NMR, 13C-NMR, and MS of all intermediates **(3a-k)** and the target compounds **(5a-k)**

| compound | X |
| --- | --- |
| 3a, 5a | N-Me |
| 3b, 5b | N-Et |
| 3c, 5c | N-Bu |
| 3d, 5d | N-Hx |
| 3e, 5e | O |
| 3f, 5f | N-Ph |
| 3g, 5g | N-4-Me-Ph |
| 3h, 5h | N-4-OMe-Ph |
| 3i, 5i | N-4-F-Ph |
| 3j, 5j | N-3,4-DiCl-Ph |
| 3k, 5k | N-2-OMe-Ph |

Chemistry

All Chemical reagents and solvents were supplied from Merck (Darmstadt, Germany) and used without further purification. Melting points were determined on a Kofler hot-stage instrument (Reichert, Vienna, Austria). The 1H-NMR spectra were obtained on a Bruker FT-400 or 700 MHz spectrometers (Bruker, Darmstadt, Germany) and CDCl3, MeOH-d4 or DMSO-d6 were used as a solvent. 13C-NMR spectra were also recorded at 100 or 176 MHz. The spin multiplicities were written as s (singlet), d (doublet), t (triplet), and m (multiplet) and the Coupling constant (J) values are given in Hertz (Hz). EI-Mass spectra were done on an Agilent 5975B instrument (Agilent Technologies, Santa Clara, CA, USA) with a triple-axis detector. Elemental analyses were determined using a Perkin Elmer Model 240-C instrument (PerkinElmer, Hopkinton, MA, USA).

General procedure for the synthesis of benzaldehyde derivatives (3a-k)

To a solution of 4-F-Benzaldehyde 1 (10 mmol) and appropriate piperazine derivatives 2 (11 mmol) in DMF (10 mL) as a solvent, K2CO3 as a base (22 mmol) was added and the reaction mixture was stirred at 140 ℃ overnight. After completion of the reaction, detected by TLC, the reaction mixture was cooled to RT and then mixed with 100 mL cooled water. The mixture was extracted with DCM (3 × 50 mL). Then the organic layers were mixed and dried over Na2SO4 and concentrated using a rotary evaporator. The crude material was purified with column chromatography to obtain the pure product (3a-k).

4-(4-methylpiperazin-1-yl)benzaldehyde (3a)

Yellow solid. Yield 84%. M.p. 55℃. 1H NMR (700 MHz, Chloroform-*d*) δ 9.79 (s, 1H), 7.76 (d, *J* = 8.9 Hz, 2H), 6.93 (d, *J* = 8.9 Hz, 2H), 3.44 (dd, *J* = 6.3, 4.0 Hz, 4H), 2.58 (t, *J* = 5.1 Hz, 4H), 2.38 (s, 3H). 13C NMR (176 MHz, Chloroform-*d*) δ 190.45, 154.95, 131.83, 127.13, 113.59, 54.58, 46.95, 45.99. EI-Mass (m/z): calc mass: 204.1, found: 204.2 [M]+. Elemental analysis: C12H16N2O, calculated: C, 70.56; H, 7.90; N, 13.71. found: C, 70.71; H, 7.93; N, 13.75.

4-(4-ethylpiperazin-1-yl)benzaldehyde (3b)

Dark orange liquid. Yield 70%.1H NMR (700 MHz, Chloroform-*d*) δ 9.73 (s, 1H), 7.62 – 7.36 (m, 2H), 6.97 – 6.63 (m, 2H), 3.37 (dq, *J* = 14.8, 4.9 Hz, 4H), 2.69 – 2.33 (m, 4H), 2.43 (dt, *J* = 11.3, 7.1 Hz, 2H), 1.35 – 1.00 (m, 3H). 13C NMR (176 MHz, Chloroform-*d*) δ 190.25, 154.93, 131.74, 126.90, 113.37, 52.26, 52.16, 46.88, 11.83. EI-Mass (m/z): calc mass: 218.14, found: 218.2 [M]+. Elemental analysis: C13H18N2O, calculated: C, 71.53; H, 8.31; N, 12.83. found: C, 71.64; H, 8.34; N, 12.88.

4-(4-butylpiperazin-1-yl)benzaldehyde (3c)

Light orange liquid. Yield 76%.1H NMR (400 MHz, Chloroform-*d*) δ 9.65 (s, 1H), 7.63 (d, *J* = 8.9 Hz, 2H), 6.79 (d, *J* = 8.9 Hz, 2H), 3.42 – 3.20 (m, 4H), 2.54 – 2.39 (m, 4H), 2.37 – 2.17 (m, 2H), 1.48 – 1.35 (m, 2H), 1.32 – 1.18 (m, 2H), 0.83 (t, *J* = 7.3 Hz, 3H). 13C NMR (101 MHz, Chloroform-*d*) δ 190.36, 155.08, 131.86, 126.97, 113.44, 58.36, 52.84, 47.02, 28.96, 20.72, 14.11. ESI-MS: calc mass: 246.17, found [2M+Na]+: 593.20. Elemental analysis: C15H22N2O, calculated: C, 73.13; H, 9.00; N, 11.37. found: C, 73.25; H, 9.04; N, 11.39.

4-(4-hexylpiperazin-1-yl)benzaldehyde (3d)

Light orange liquid. Yield 79%. 1H NMR (400 MHz, Chloroform-*d*) δ 9.71 (dd, *J* = 3.5, 1.5 Hz, 1H), 7.77 – 7.55 (m, 2H), 6.93 – 6.76 (m, 2H), 3.35 (q, *J* = 4.7, 4.2 Hz, 4H), 2.53 (q, *J* = 4.7 Hz, 4H), 2.33 (dtd, *J* = 8.9, 4.9, 2.3 Hz, 2H), 1.58 – 1.39 (m, 2H), 1.36 – 1.14 (m, 6H), 0.84 (dt, *J* = 7.2, 3.2 Hz, 3H). 13C NMR (101 MHz, Chloroform-*d*) δ 190.48, 155.10, 131.92, 127.14, 113.54, 58.76, 52.88, 47.08, 31.82, 27.26, 26.79, 22.67, 14.12. ESI-MS: calc mass: 274.20, found [M+H]+: 275.05. Elemental analysis: C17H26N2O, calculated: C, 74.41; H, 9.55; N, 10.21. found: C, 74.53; H, 9.59; N, 10.24.

4-morpholinobenzaldehyde (3e)

Yellow solid. Yield 81%. M.p. 70-2℃. 1H NMR (400 MHz, Chloroform-*d*) δ 9.79 (s, 1H), 7.82 – 7.67 (m, 2H), 6.94 (d, *J* = 8.8 Hz, 2H), 3.94 – 3.76 (m, 4), 3.42 – 3.18 (m, 4H). 13C NMR (101 MHz, Chloroform-*d*) δ 190.59, 154.98, 131.90, 128.05, 113.81, 66.51, 47.61. Elemental analysis: C11H13NO2, calculated: C, 69.09; H, 6.85; N, 7.32. found: C, 69.22; H, 6.89; N, 7.35.

4-(4-phenylpiperazin-1-yl)benzaldehyde (3f)

Yellow solid. Yield 72%. M.p. 129-31℃. 1H NMR (700 MHz, Chloroform-*d*) δ 9.83 (s, 1H), 8.01 – 7.75 (m, 2H), 7.47 – 7.22 (m, 2H), 7.09 – 6.86 (m, 5H), 3.66 – 3.53 (m, 4H), 3.46 – 3.28 (m, 4H). 13C NMR (176 MHz, Chloroform-*d*) δ 190.53, 154.91, 150.86, 131.91, 129.30, 127.38, 120.37, 116.33, 113.68, 49.01, 47.21. EI-Mass (m/z): calc mass: 266.14, found: 266.1 [M]+. Elemental Analysis: C17H18N2O. C, 76.66; H, 6.81; N, 10.52. found: C, 76.75; H, 6.83; N, 10.57.

4-(4-(p-tolyl)piperazin-1-yl)benzaldehyde (3g)

Yellow solid. Yield 69%. M.p. 154-6℃. 1H NMR (400 MHz, Chloroform-*d*) δ 9.80 (s, 1H), 7.83 – 7.71 (m, 2H), 7.22 – 6.81 (m, 6H), 3.79 – 3.54 (m, 4H), 3.35 (s, 4H), 2.30 (s, 3H). 13C NMR (101 MHz, Chloroform-*d*) δ 190.55, 154.94, 132.18, 131.98, 129.98, 127.55, 119.47, 117.09, 113.87, 77.45, 77.33, 77.13, 76.81, 50.01, 47.21, 20.60. EI-Mass (m/z): calc mass: 280.15, found: 280.1 [M]+. Elemental Analysis: C18H20N2O. C, 77.11; H, 7.19; N, 9.99. found: C, 77.20; H, 7.23; N, 9.95.

4-(4-(4-methoxyphenyl)piperazin-1-yl)benzaldehyde (3h)

Yellow solid. Yield 77%. M.p. 156-8℃.1H NMR (400 MHz, Chloroform-*d*) δ 9.79 (s, 1H), 7.77 (d, *J* = 9.0 Hz, 2H), 7.06 – 6.62 (m, 6H), 3.77 (s, 3H), 3.67 – 3.48 (m, 4H), 3.24 (t, *J* = 5.2 Hz, 4H). 13C NMR (101 MHz, Chloroform-*d*) δ 190.56, 154.94, 131.98, 127.59, 119.15, 119.05, 114.73, 113.92, 55.68, 50.97, 47.29. ESI-MS: calc mass: 296.15, found [2M+H]+: 593.20. Elemental Analysis: C18H20N2O2. C, 72.95; H, 6.80; N, 9.45. found: C, 73.08; H, 6.83; N, 9.51.

4-(4-(4-fluorophenyl)piperazin-1-yl)benzaldehyde (3i)

Yellow solid. Yield 63%. M.p. 123-5℃.1H NMR (400 MHz, Chloroform-*d*) δ 9.79 (s, 1H), 7.85 – 7.65 (m, 6H), 7.14 – 6.89 (m, 6H), 3.57 (q, *J* = 5.4, 4.7 Hz, 6H), 3.25 (dt, *J* = 10.6, 5.3 Hz, 6H). 13C NMR (101 MHz, Chloroform-*d*) δ 190.56, 155.87 (d, J = 245.1 Hz), 155.05, 131.98, 129.57 (d, *J* = 8.5 Hz), 127.62, 119.28, 116.43(d, *J* = 22.3 Hz), 113.93, 50.42, 47.48. ESI-MS: calc mass: 284.13, found [2M+H]+: 569.30. Elemental Analysis: C17H17FN2O. C, 71.81; H, 6.03; N, 9.85. found: C, 71.90; H, 6.05; N, 9.89.

4-(4-(3,4-dichlorophenyl)piperazin-1-yl)benzaldehyde (3j)

Yellow solid. Yield 75%. M.p. 179-81℃.1H NMR (400 MHz, Chloroform-*d*) δ 9.80 (s, 1H), 7.78 (d, *J* = 8.9 Hz, 2H), 7.31 (dd, *J* = 8.8, 0.7 Hz, 1H), 7.02 (s, 1H), 6.98 – 6.92 (m, 2H), 6.81 (ddd, *J* = 8.9, 3.6, 1.9 Hz, 1H), 3.62 – 3.51 (m, 4H), 3.38 – 3.30 (m, 4H). 13C NMR (101 MHz, Chloroform-*d*) δ 190.55, 154.58, 149.81, 133.15, 131.98, 130.79, 127.86, 123.50, 117.80, 115.83, 114.00, 48.76, 47.02. ESI-MS: calc mass: 334.06, found [M+H]+: 335.20. Elemental Analysis: calculated: C17H16Cl2N2O. C, 60.91; H, 4.81; N, 8.36. found: C, 60.99; H, 4.84; N, 8.33.

4-(4-(2-methoxyphenyl)piperazin-1-yl)benzaldehyde (3k)

Yellow solid. Yield 78%. M.p. 120-2℃.1H NMR (400 MHz, Chloroform-*d*) δ 9.78 (s, 1H), 7.76 (d, *J* = 8.9 Hz, 2H), 7.11 – 6.72 (m, 6H), 3.88 (s, 3H), 3.65 – 3.40 (m, 4H), 3.32 – 3.03 (m, 4H). 13C NMR (101 MHz, Chloroform-*d*) δ 190.62, 155.27, 152.39, 140.81, 132.00, 127.26, 123.63, 121.17, 118.38, 113.68, 111.45, 77.45, 77.33, 77.13, 76.81, 55.56, 50.50, 47.52. ESI-MS: calc mass: 296.15, found [2M+H]+: 593.20. Elemental Analysis: calculated: C18H20N2O2. C, 72.95; H, 6.80; N, 9.45. found: C, 72.99; H, 6.82; N, 9.40.

General procedure for the synthesis of target compounds (5a-k)

A mixture of benzaldehyde derivative 3 (1 mmol), 2-aminobenzimidazole 4 (1mmol), and triethylamine (2 mmol) in ethanol as a solvent was stirred at 50 ℃ overnight. After completion of the reaction, detected by TLC, the precipitates were collected using suction filtration and the collected solid was recrystallized in ethanol to get the pure product (5a-k).

(E)-N-(1H-benzo[d]imidazol-2-yl)-1-(4-(4-methylpiperazin-1-yl)phenyl)methanimine (5a)

Yellow solid; yield 77%; M.p. 296-8℃. IR (KBr): ʋ cm–1 = 3300, 3043, 2903, 1600, 1539, 1426, 1299.1H NMR (400 MHz, DMSO-*d*6) δ 9.21 (s, 1H), 7.88 – 7.80 (m, 2H), 7.69 – 7.25 (m, 2H), 7.12 – 6.97 (m, 4H), 3.36 – 3.33 (m, 4H), 2.40 (q, *J* = 5.0 Hz, 4H), 2.18 (d, *J* = 5.6 Hz, 3H). 13C NMR (176 MHz, DMSO-*d*6) δ 191.28, 150.71, 131.54, 129.44, 127.69, 123.45, 116.74, 114.42, 111.03, 51.83, 50.63, 44.47. EI-Mass (m/z): calc mass: 319.18, found: 319.3 [M]+. Elemental analysis: C19H21N5, calculated: C, 71.45; H, 6.63; N, 21.93. found: C, 71.56; H, 6.68; N, 22.01.

(E)-N-(1H-benzo[d]imidazol-2-yl)-1-(4-(4-ethylpiperazin-1-yl)phenyl)methanimine (5b)

Yellow solid; yield 72%; M.p. 256-8℃. IR (KBr): ʋ cm–1 = 3310, 3055, 2892, 1606, 1530, 1434, 1283.1H NMR (700 MHz, Methanol-*d*4) δ 9.73 (s, 1H), 7.87 – 6.92 (m, 8H), 4.15 (d, *J* = 14.0 Hz, 1H), 3.89 (d, *J* = 11.0 Hz, 1H), 3.71 (dd, *J* = 22.6, 11.1 Hz, 2H), 3.39 – 3.25 (m, 5H), 3.19 (td, *J* = 12.4, 3.3 Hz, 1H), 1.41 (t, *J* = 7.3 Hz, 3H). 13C NMR (176 MHz, DMSO-*d*6 ) δ 191.28, 150.71, 131.54, 129.44, 127.69, 123.45, 116.74, 114.42, 111.03, 51.83, 50.63, 44.47, 8.22. EI-Mass (m/z): calc mass: 333.2, found: 333.3 [M]+. Elemental analysis: C20H23N5, calculated: C, 72.04; H, 6.95; N, 21.00. found: C, 72.15; H, 6.99; N, 21.07.

(E)-N-(1H-benzo[d]imidazol-2-yl)-1-(4-(4-butylpiperazin-1-yl)phenyl)methanimine (5c)

Yellow solid; yield 76%; M.p. 253-5℃. IR (KBr): ʋ cm–1 = 3354, 3081, 2910, 1607, 1541, 1419.1H NMR (700 MHz, DMSO-*d*6) δ 9.75 (s, 1H), 7.77 (d, *J* = 8.3 Hz, 2H), 7.47 – 7.02 (m, 6H), 3.60 – 3.45 (m, 4H), 3.30 (t, *J* = 13.1 Hz, 2H), 3.09 (t, *J* = 8.4 Hz, 4H), 1.68 (q, *J* = 8.0, 7.5 Hz, 2H), 1.32 (q, *J* = 7.5 Hz, 2H), 0.90 (t, *J* = 7.4 Hz, 3H). 13C NMR (176 MHz, DMSO-*d*6) δ 191.41, 154.05, 150.87, 132.00, 129.92, 127.81, 123.61, 114.58, 111.80, 55.83, 50.78, 44.18, 25.49, 19.82, 13.90. EI-Mass (m/z): calc mass: 361.23, found: 361.3 [M]+. Elemental analysis: C22H27N5, calculated: C, 73.10; H, 7.53; N, 19.37. found: C, 73.19; H, 7.56; N, 19.44.

(E)-N-(1H-benzo[d]imidazol-2-yl)-1-(4-(4-hexylpiperazin-1-yl)phenyl)methanimine (5d)

Yellow solid; yield 81%; M.p. 247-9℃. IR (KBr): ʋ cm–1 = 3060, 2881, 1600, 1539, 1428, 1274.1H NMR (700 MHz, DMSO-*d*6) δ 9.74 (s, 1H), 7.81 – 7.65 (m, 2H), 7.36 (dd, *J* = 5.9, 3.2 Hz, 2H), 7.21 (dd, *J* = 5.9, 3.2 Hz, 2H), 7.16 – 7.05 (m, 2H), 4.09 (d, *J* = 13.8 Hz, 2H), 3.55 (d, *J* = 12.3 Hz, 2H), 3.31 (d, *J* = 13.3 Hz, 2H), 3.16 – 3.00 (m, 4H), 1.77 – 1.65 (m, 2H), 1.35 – 1.18 (m, 6H), 0.93 – 0.77 (m, 3H). 13C NMR (176 MHz, DMSO-*d*6) δ 189.32, 151.99, 148.80, 129.93, 127.83, 125.73, 121.53, 112.49, 109.72, 53.97, 48.69, 42.10, 29.00, 24.02, 21.33, 20.20, 12.20. EI-Mass (m/z): calc mass: 389.26, found: 389.4 [M]+. Elemental analysis: C24H31N5, calculated: C, 74.00; H, 8.02; N, 17.98. found: C, 74.12; H, 8.06; N, 17.93.

(E)-N-(1H-benzo[d]imidazol-2-yl)-1-(4-morpholinophenyl)methanimine (5e)

Yellow solid; yield 30%; M.p. 230℃ (Decomposed). IR (KBr): ʋ cm–1 = 3320, 2990, 2900, 1628, 1587, 1436. 1H NMR (400 MHz, Methanol-*d*4) δ 9.66 (s, 1H), 7.85 – 7.58 (m, 2H), 7.17 (dt, *J* = 5.8, 3.5 Hz, 2H), 7.08 – 6.87 (m, 4H), 3.91 – 3.64 (m, 4H), 3.34 – 3.30 (m, 4H). 13C NMR (101 MHz, Methanol-*d*4) δ 191.29, 155.76, 131.65, 127.25, 122.12, 120.48, 113.78, 113.23, 111.43, 66.30, 47.01. EI-Mass (m/z): calc mass: 306.15, found: 306.3 [M]+. Elemental analysis: C18H18N4O, calculated: C, 70.57; H, 5.92; N, 18.29. found: C, 70.69; H, 5.98; N, 18.35.

(E)-N-(1H-benzo[d]imidazol-2-yl)-1-(4-(4-phenylpiperazin-1-yl)phenyl)methanimine (5f)

Yellow solid; yield 64%; M.p. 300℃ ˂. IR (KBr): ʋ cm–1 =3363, 3050, 1626, 1568, 1452, 1265, 1210, 746. 1H NMR (700 MHz, DMSO-*d*6) δ 9.73 (s, 1H), 7.76 (d, *J* = 8.9 Hz, 2H), 7.49 – 7.39 (m, 4H), 7.36 (dd, *J* = 5.9, 3.2 Hz, 2H), 7.23 – 7.16 (m, 3H), 7.12 (d, *J* = 8.9 Hz, 2H), 3.78 – 3.69 (m, 4H), 3.54 – 3.47 (m, 4H). 13C NMR (176 MHz, DMSO-*d*6) δ 191.28, 154.52, 150.87, 146.37, 132.07, 130.13, 129.89, 127.36, 125.45, 123.60, 119.25, 114.25, 111.78, 51.64, 45.59. EI-Mass (m/z): calc mass: 381.20, found: 381.3 [M]+. Elemental analysis: C24H23N5, calculated: C, 75.56; H, 6.08; N, 18.36. found: C, 75.66; H, 6.11; N, 18.43.

(E)-N-(1H-benzo[d]imidazol-2-yl)-1-(4-(4-(p-tolyl)piperazin-1-yl)phenyl)methanimine (5g)

Yellow solid; yield 59%; M.p. 300℃ ˂. IR (KBr): ʋ cm–1 = 3063, 2874, 1602, 1531, 1420, 1283, 1170, 1039. 1H NMR (700 MHz, DMSO-*d*6) δ 9.80 (s, 1H), 8.00 – 6.90 (m, 12H), 3.99 (s, 4H), 3.69 (t, *J* = 5.2 Hz, 4H), 2.35 (s, 3H). 13C NMR (176 MHz, DMSO-*d*6) δ 191.12, 154.16, 150.95, 131.96, 130.77, 130.75, 129.99, 127.76, 123.38, 121.67, 114.49, 114.48, 111.83, 54.03, 44.62, 20.97. EI-Mass (m/z): calc mass: 395.21, found: 395.3 [M]+. Elemental analysis: C25H25N5, calculated: C, 75.92; H, 6.37; N, 17.71. found: C, 75.98; H, 6.34; N, 17.79.

(E)-N-(1H-benzo[d]imidazol-2-yl)-1-(4-(4-(4-methoxyphenyl)piperazin-1-yl)phenyl)methanimine (5h)

Yellow solid; yield 52%; M.p. 300℃ ˂. IR (KBr): ʋ cm–1 = 3300, 2840, 1630, 1560, 1420, 1250. 1H NMR (700 MHz, ) δ 9.76 (s, 1H), 7.86 – 7.67 (m, 4H), 7.43 – 7.00 (m, 8H), 3.91 (s, 4H), 3.78 (s, 3H), 3.68 (t, *J* = 5.2 Hz, 4H). 13C NMR (176 MHz, DMSO-*d*6) δ 191.39, 159.95, 154.14, 150.86, 135.40, 132.04, 129.89, 127.80, 123.60, 123.23, 115.52, 114.58, 111.79, 56.09, 54.56, 44.69. EI-Mass (m/z): calc mass: 411.21, found: 411.3 [M]+. Elemental analysis: C25H25N5O, calculated: C, 72.97; H, 6.12; N, 17.02. found: C, 72.90; H, 6.15; N, 17.09.

(E)-N-(1H-benzo[d]imidazol-2-yl)-1-(4-(4-(4-fluorophenyl)piperazin-1-yl)phenyl)methanimine (5i)

Yellow solid; yield 61%; M.p. 300℃ ˂. IR (KBr): ʋ cm–1 = 3375, 3065, 2993, 1612, 1570, 1500, 1429, 1311, 1234, 1089, 821, 738. 1H NMR (700 MHz, ) δ 9.73 (s, 1H), 7.81 – 7.71 (m, 2H), 7.70 – 7.59 (m, 2H), 7.42 – 7.05 (m, 8H), 3.89 – 3.72 (m, 4H), 3.63 – 3.49 (m, 4H). 13C NMR (176 MHz, DMSO-*d*6) δ 191.30, 160.53 (d, *J* = 243.6 Hz), 154.35, 150.85, 141.63, 132.03, 129.87, 127.53, 123.58, 122.46 (d, *J* = 12.1 Hz), 116.92 (d, *J* = 25.3 Hz), 114.39, 111.78, 52.87, 45.32. EI-Mass (m/z): calc mass: 399.21, found: 399.3 [M]+. Elemental analysis: C24H22FN5, calculated: C, 72.16; H, 5.55; N, 17.53. found: C, 72.24; H, 5.57; N, 17.59.

(E)-1-(4-(4-(3,4-dichlorophenyl)piperazin-1-yl)phenyl)-N-(1H-indol-2-yl)methanimine (5j)

Yellow solid; yield 72%; 293-5℃. IR (KBr): ʋ cm–1 = 3400, 2880, 1640, 1560, 1420, 1300, 810. 1H NMR (700 MHz, ) δ 9.70 (s, 1H), 7.73 (d, *J* = 8.9 Hz, 2H), 7.41 (d, *J* = 9.0 Hz, 1H), 7.36 (dd, *J* = 5.9, 3.2 Hz, 2H), 7.21 (dd, *J* = 5.9, 3.2 Hz, 2H), 7.15 (d, *J* = 2.9 Hz, 1H), 7.07 (d, *J* = 8.8 Hz, 2H), 6.97 (dd, *J* = 9.0, 2.9 Hz, 1H), 3.58 – 3.48 (m, 4H), 3.38 – 3.28 (m, 4H). 13C NMR (176 MHz, DMSO-*d*6) δ 191.09, 154.83, 150.87, 150.64, 132.00, 131.03, 129.91, 126.81, 123.62, 123.61, 120.39, 116.71, 115.86, 113.80, 111.78, 47.54, 46.36. EI-Mass (m/z): calc mass: 449.12, found: 449.2 [M]+. Elemental analysis: C24H21Cl2N5, calculated: C, 64.01; H, 4.70; N, 15.55. found: C, 64.08; H, 4.73; N, 15.52.

(E)-N-(1H-benzo[d]imidazol-2-yl)-1-(4-(4-(2-methoxyphenyl)piperazin-1-yl)phenyl)methanimine (5k)

Yellow solid; yield 48%; M.p. 225-7℃. IR (KBr): ʋ cm–1 = 3300, 3105, 2900, 1620, 1600, 1580, 1430, 1275. 1H NMR (400 MHz, Methanol-*d*4) δ 9.67 (s, 1H), 7.96 – 7.68 (m, 2H), 7.50 – 6.83 (m, 10H), 3.89 – 3.82 (s, 3H), 3.56 (dq, *J* = 7.6, 3.0, 2.4 Hz, 4H), 3.15 (ddd, *J* = 10.3, 6.4, 3.6 Hz, 4H). 13C NMR (101 MHz, DMSO-*d*6) δ 190.42, 154.90, 151.82, 135.34, 130.92, 126.47, 126.07, 122.73, 120.07, 119.86, 117.39, 114.59, 112.56, 110.68, 110.57, 62.28, 53.83, 49.70. EI-Mass (m/z): calc mass: 411.21, found: 411.2 [M]+. Elemental analysis: C25H25N5O, calculated: C, 72.97; H, 6.12; N, 17.02. found: C, 72.93; H, 6.16; N, 17.05.


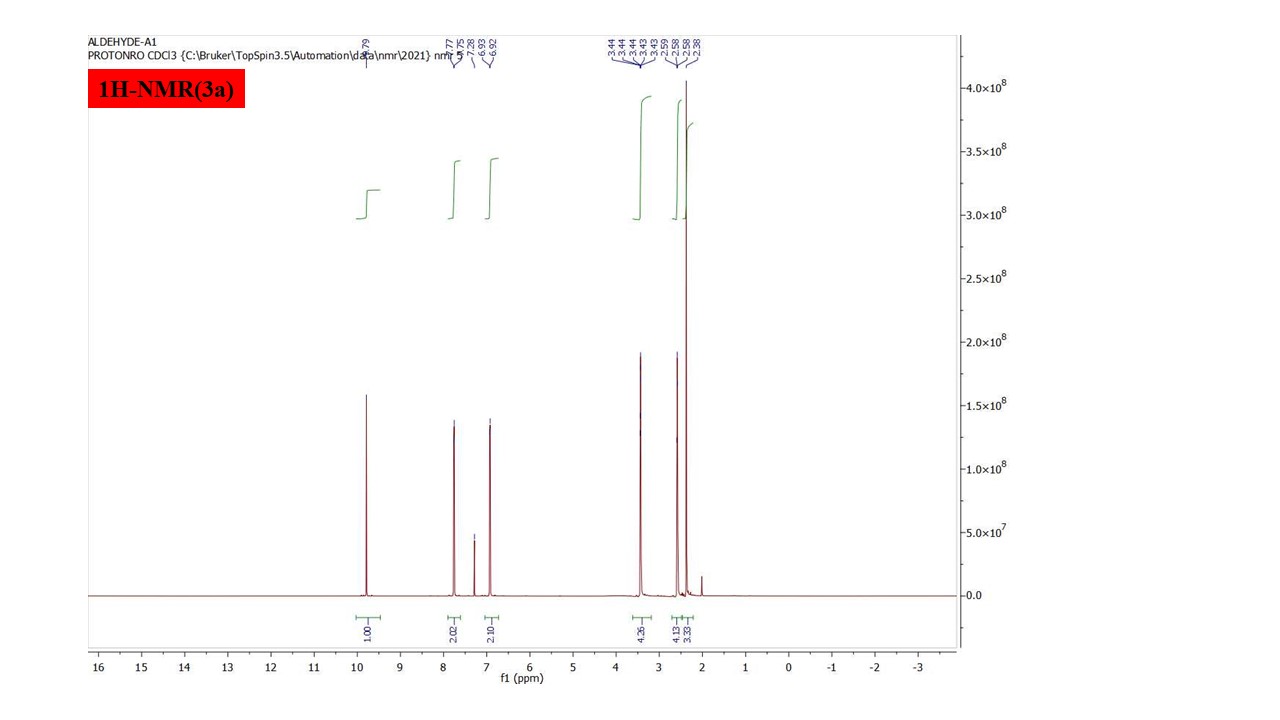

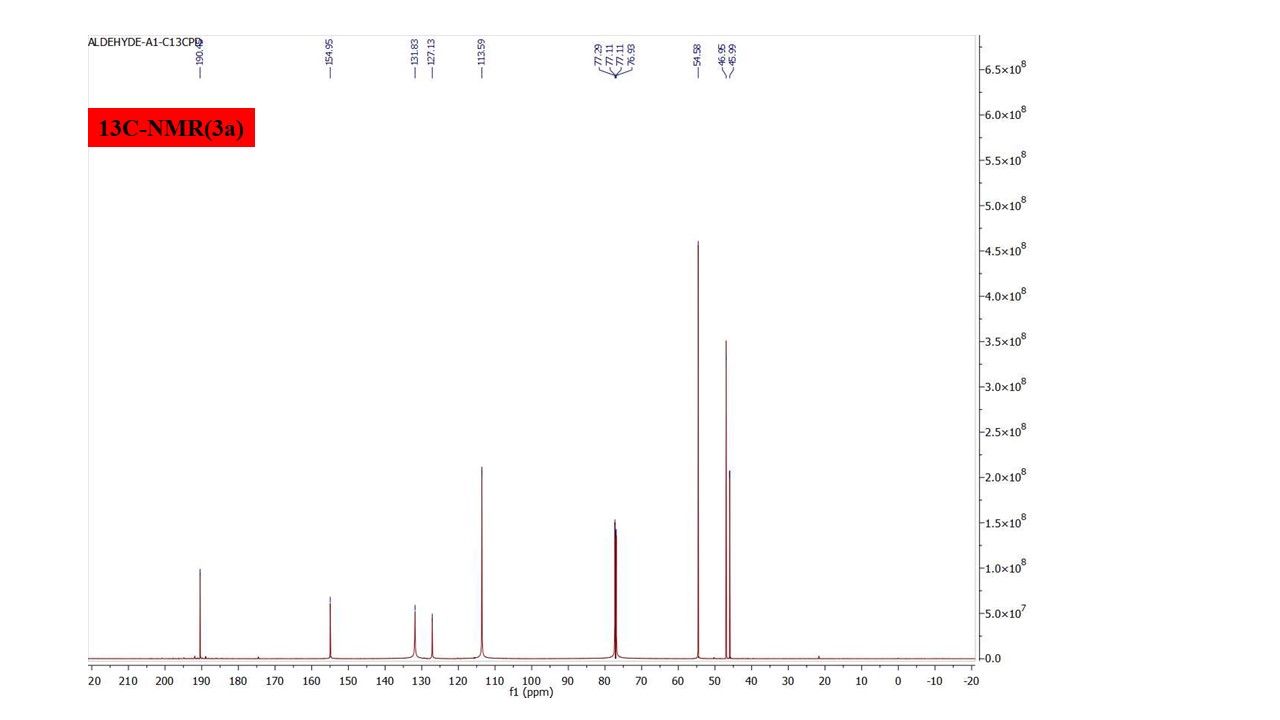

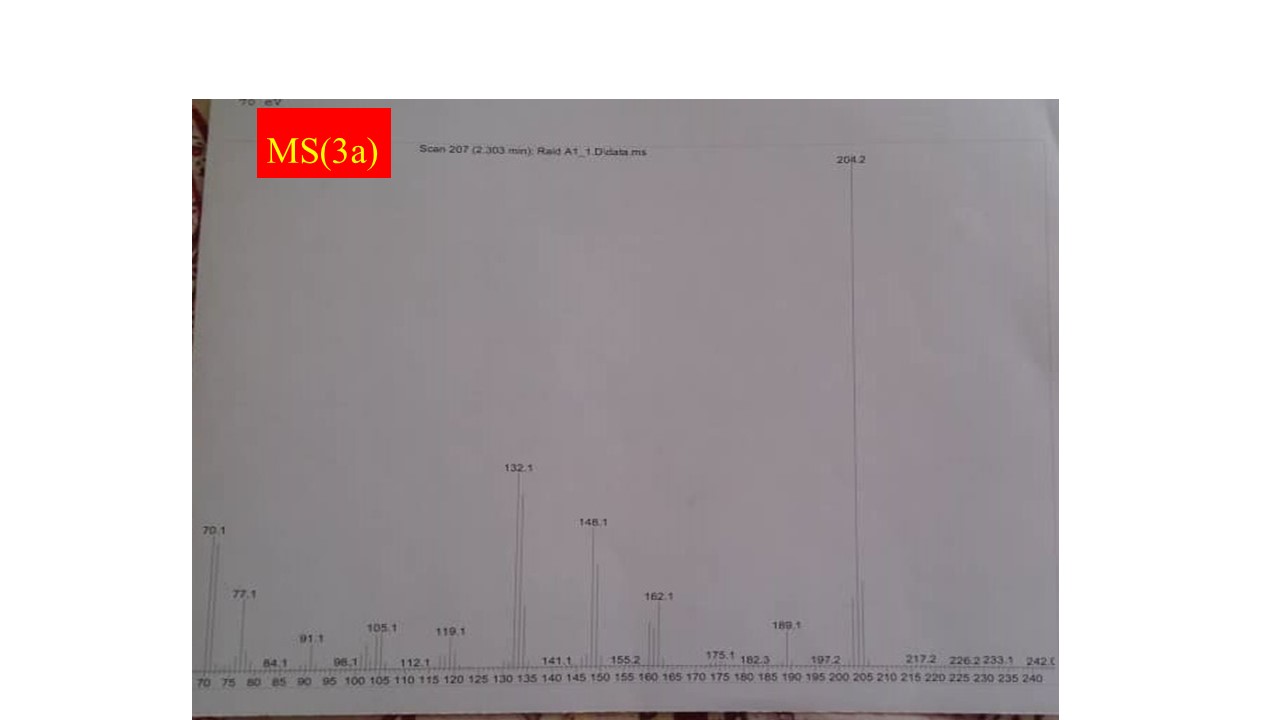

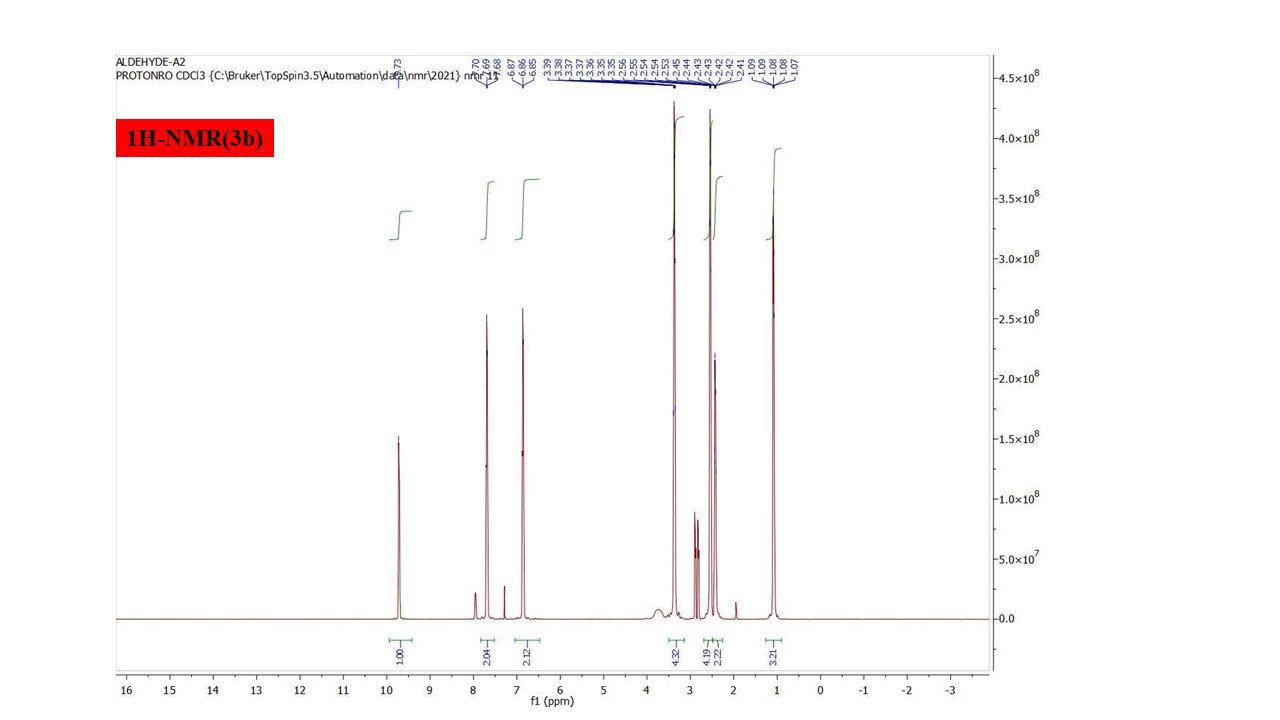

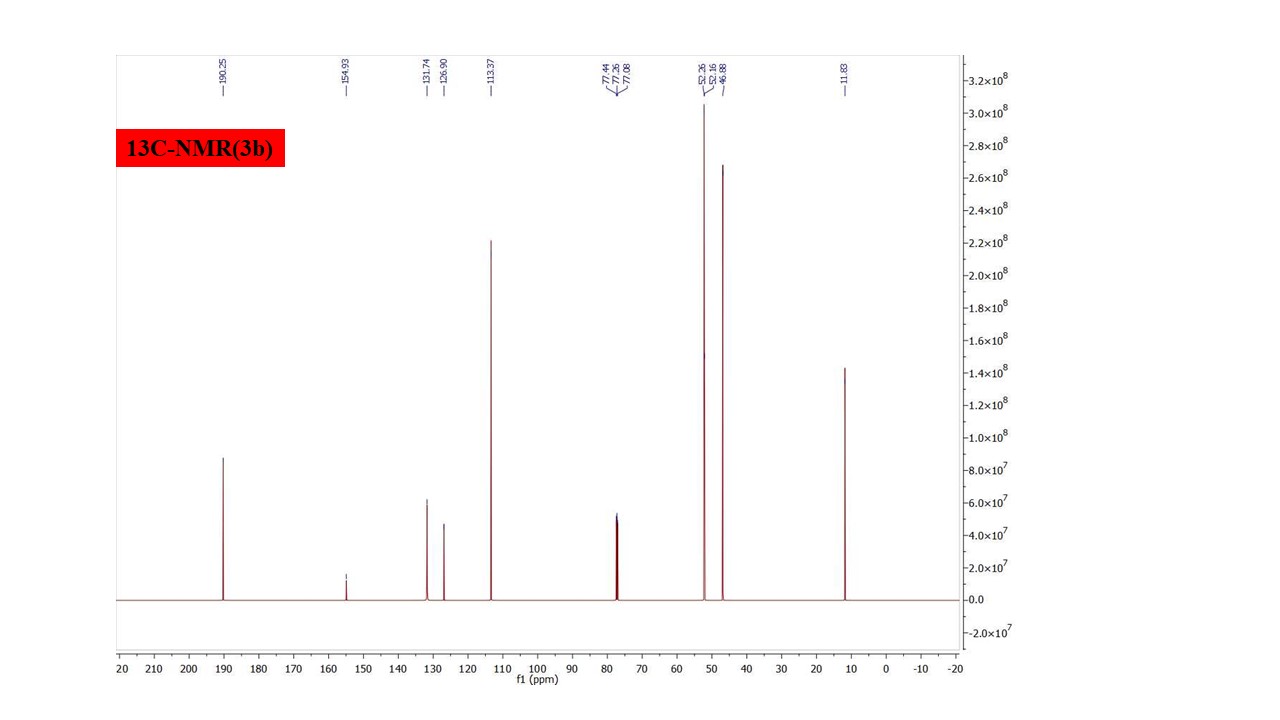

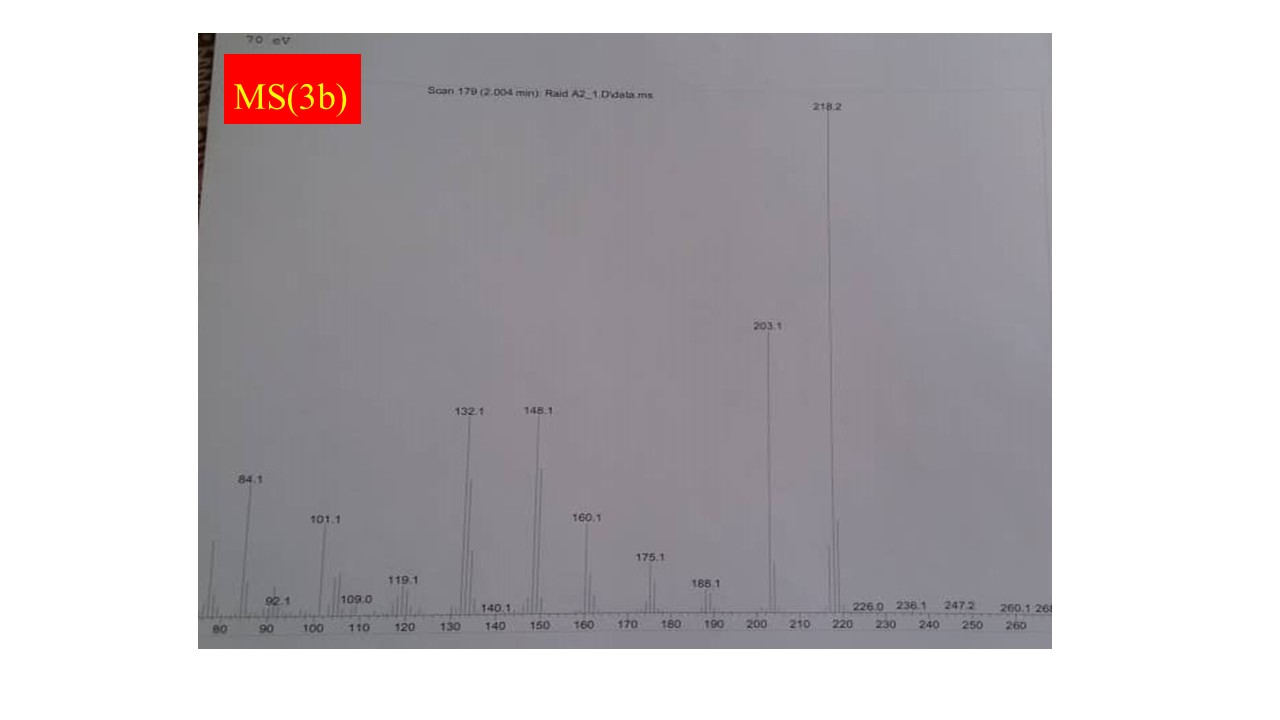

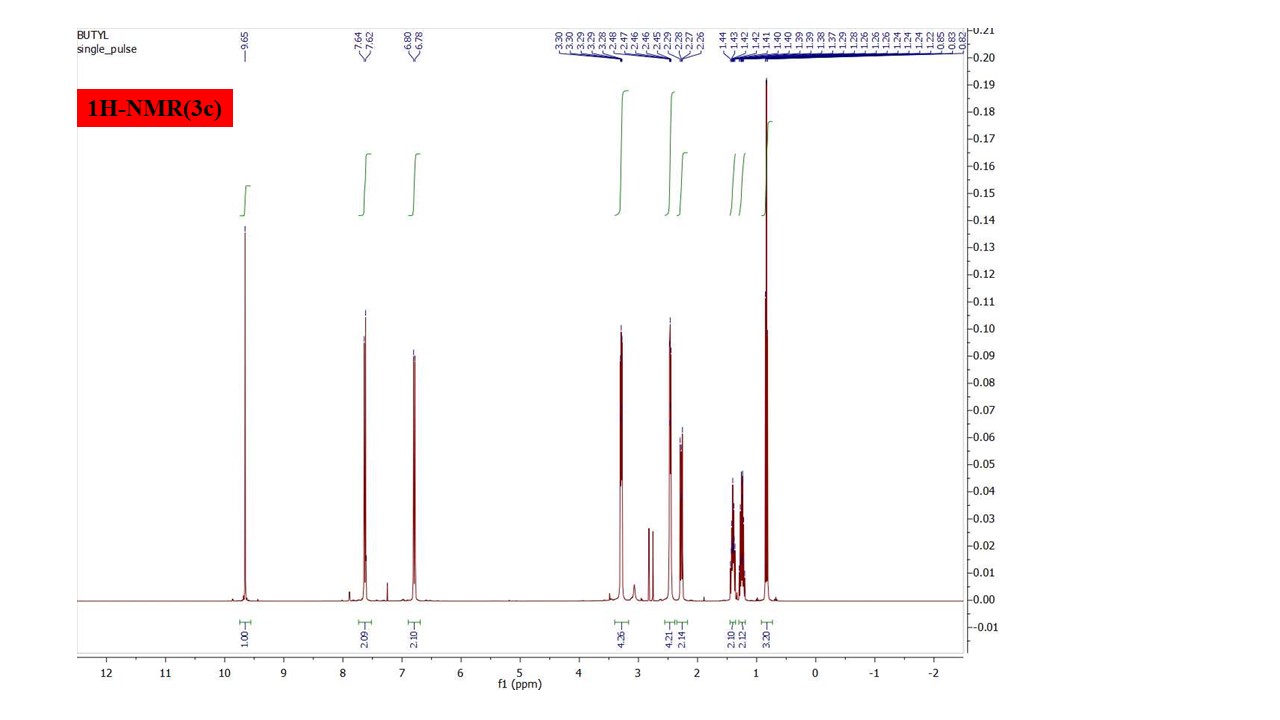

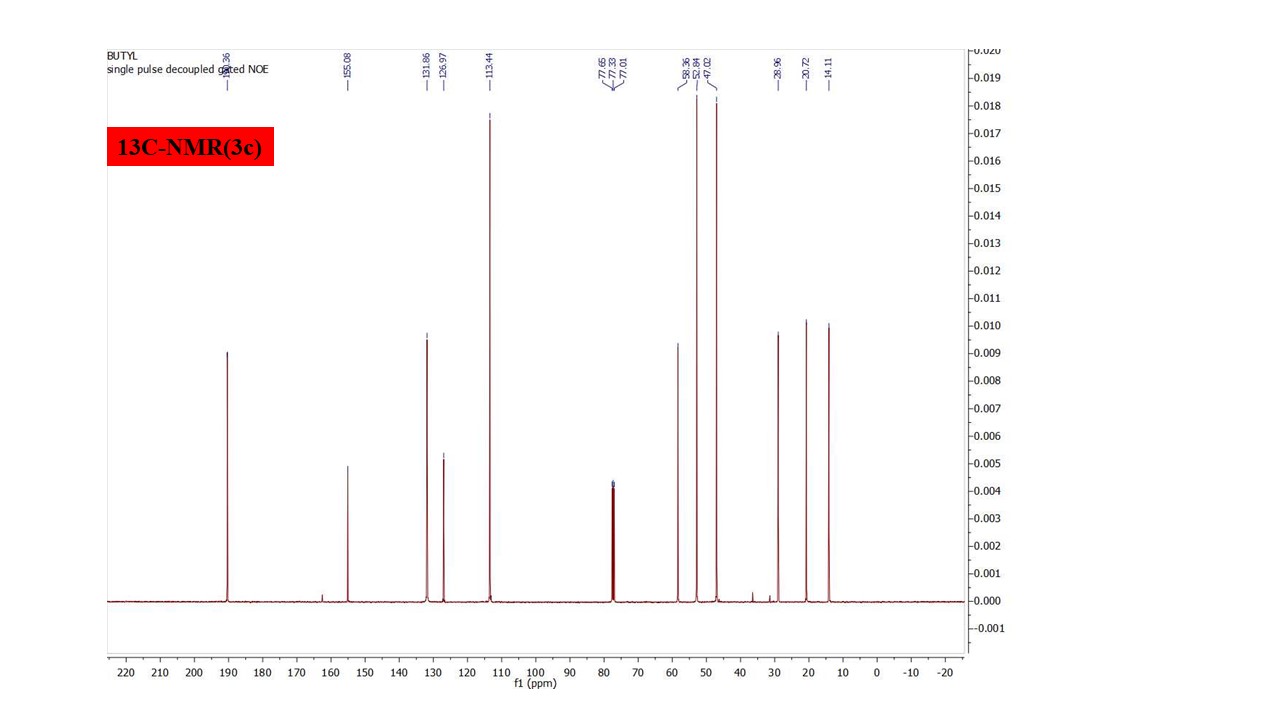

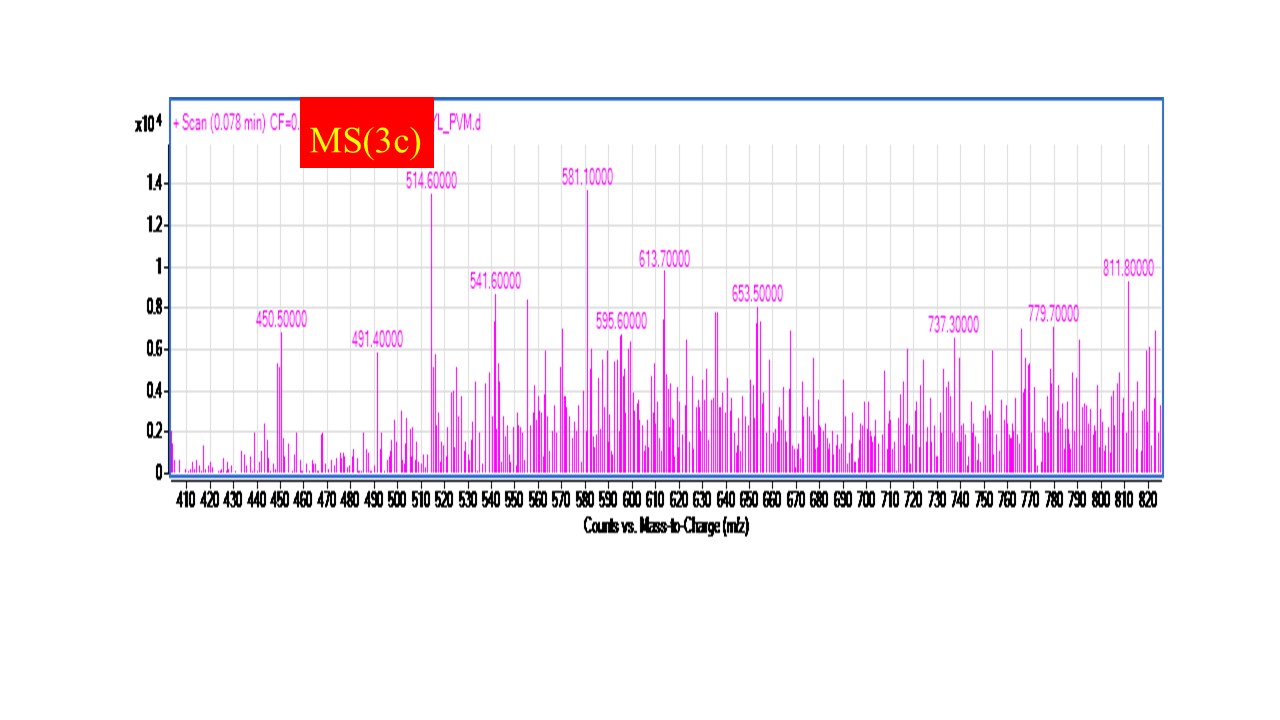

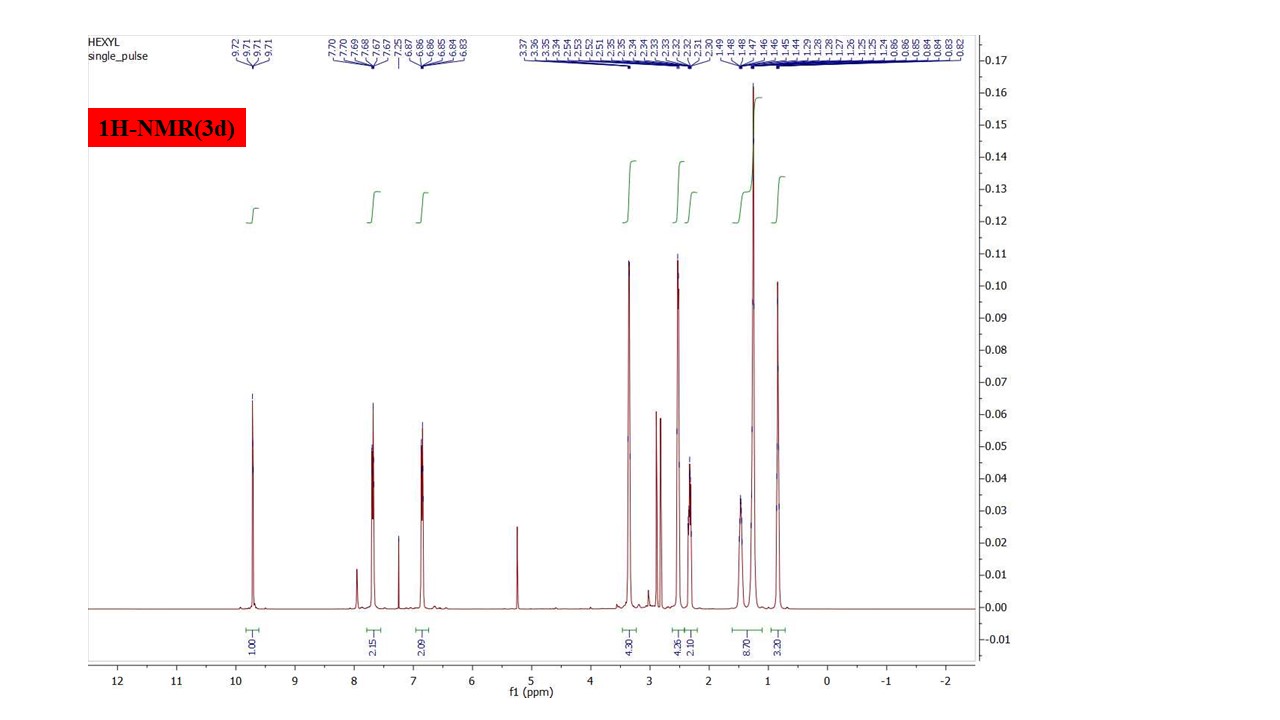

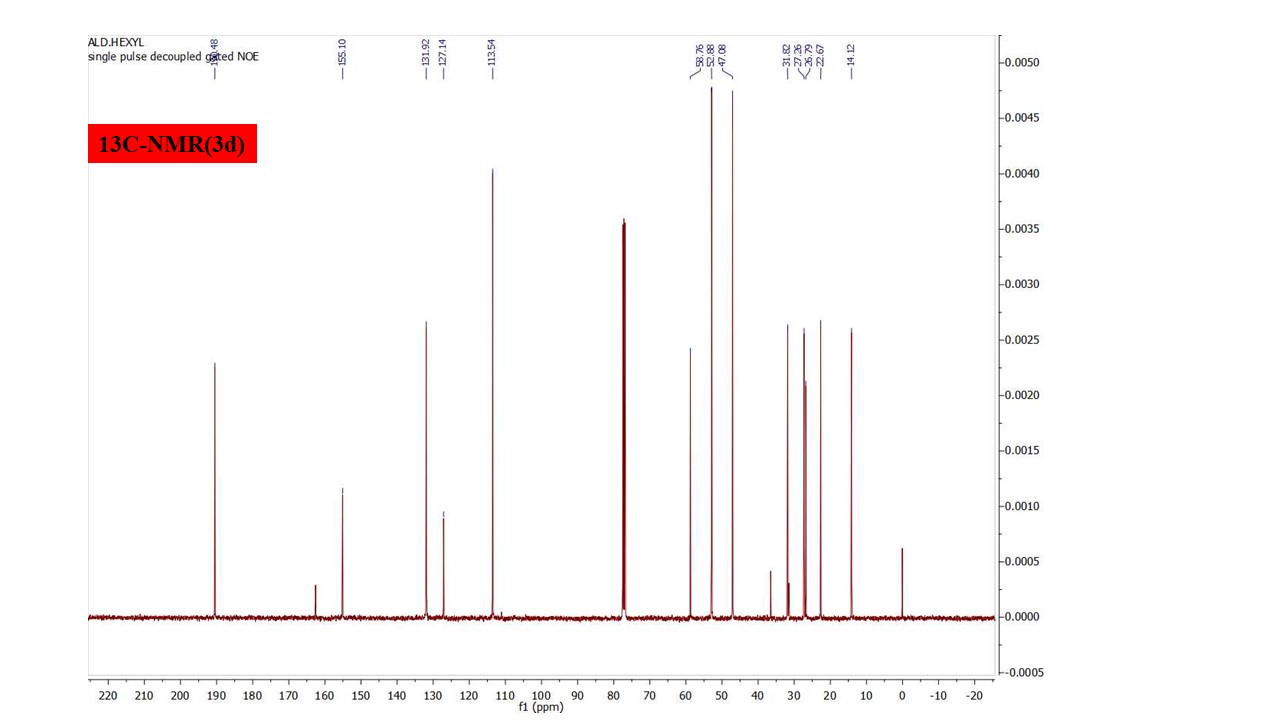

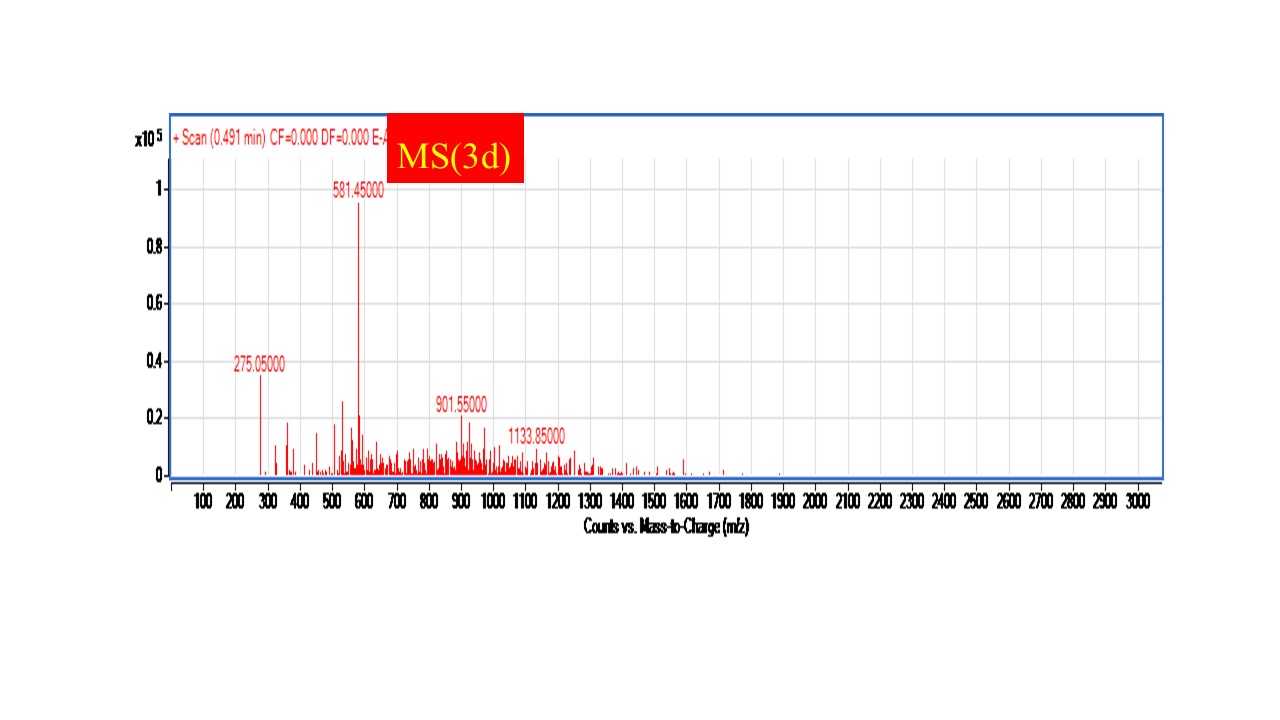

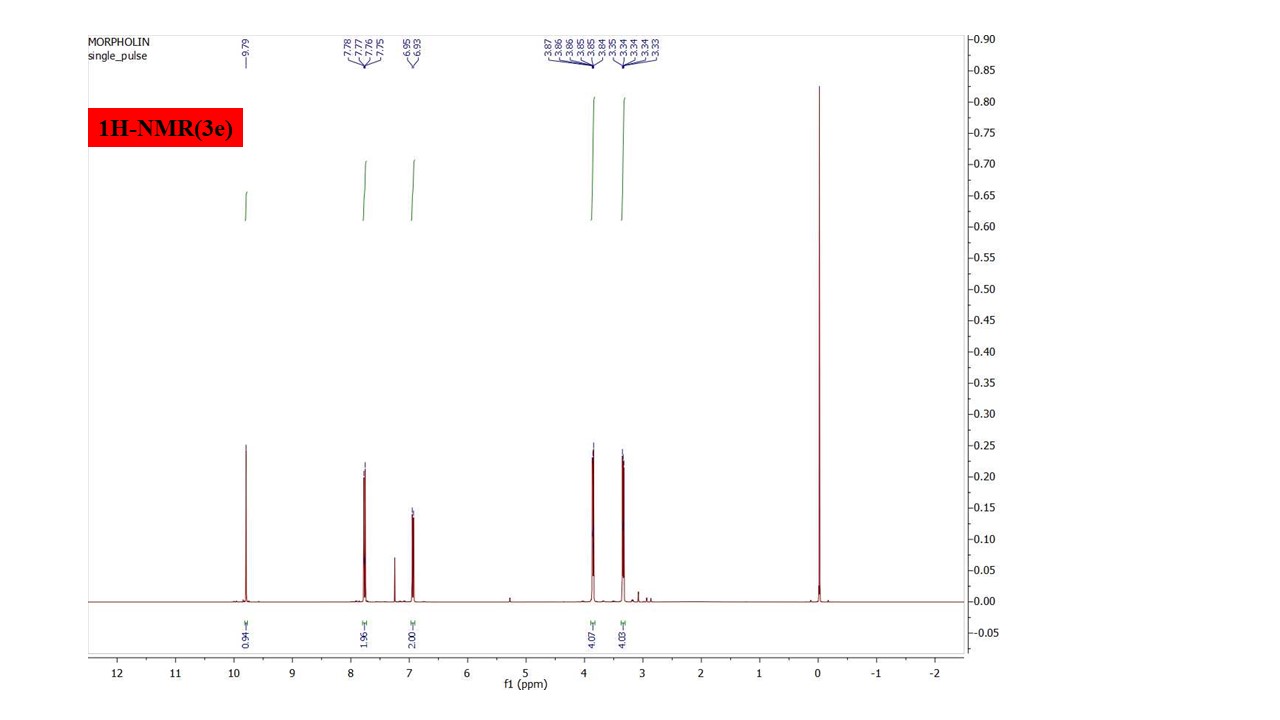

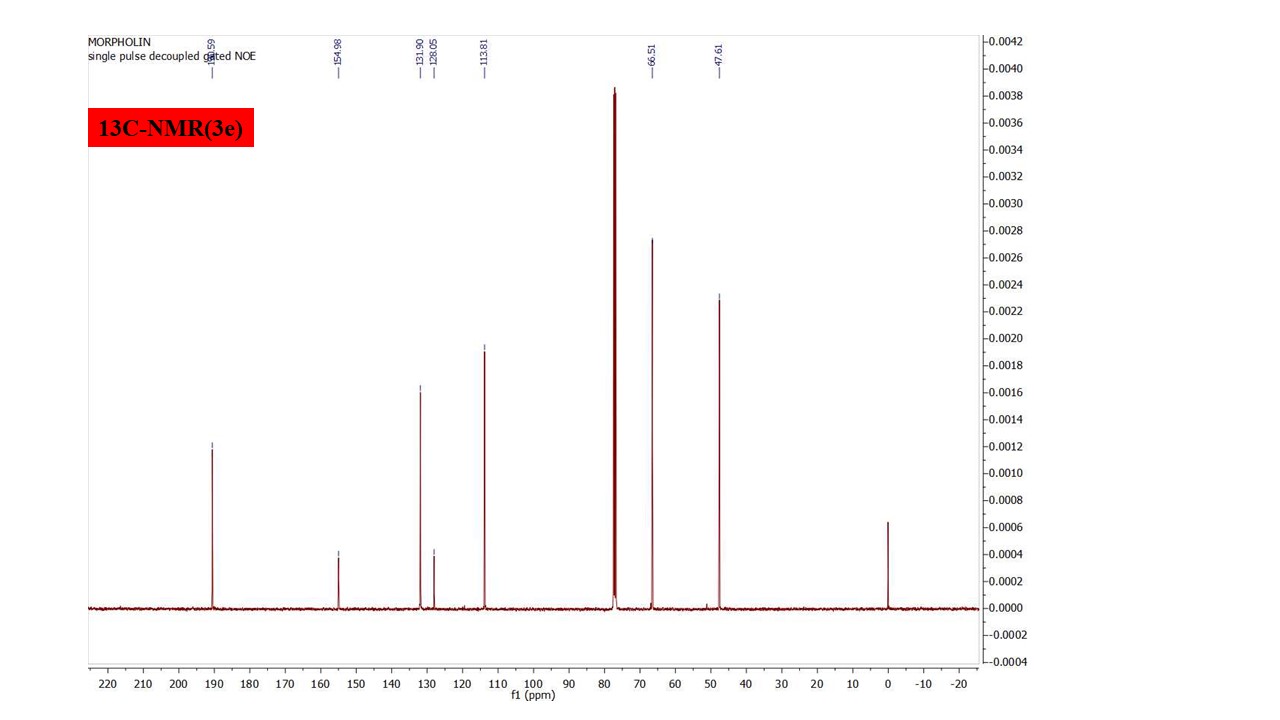

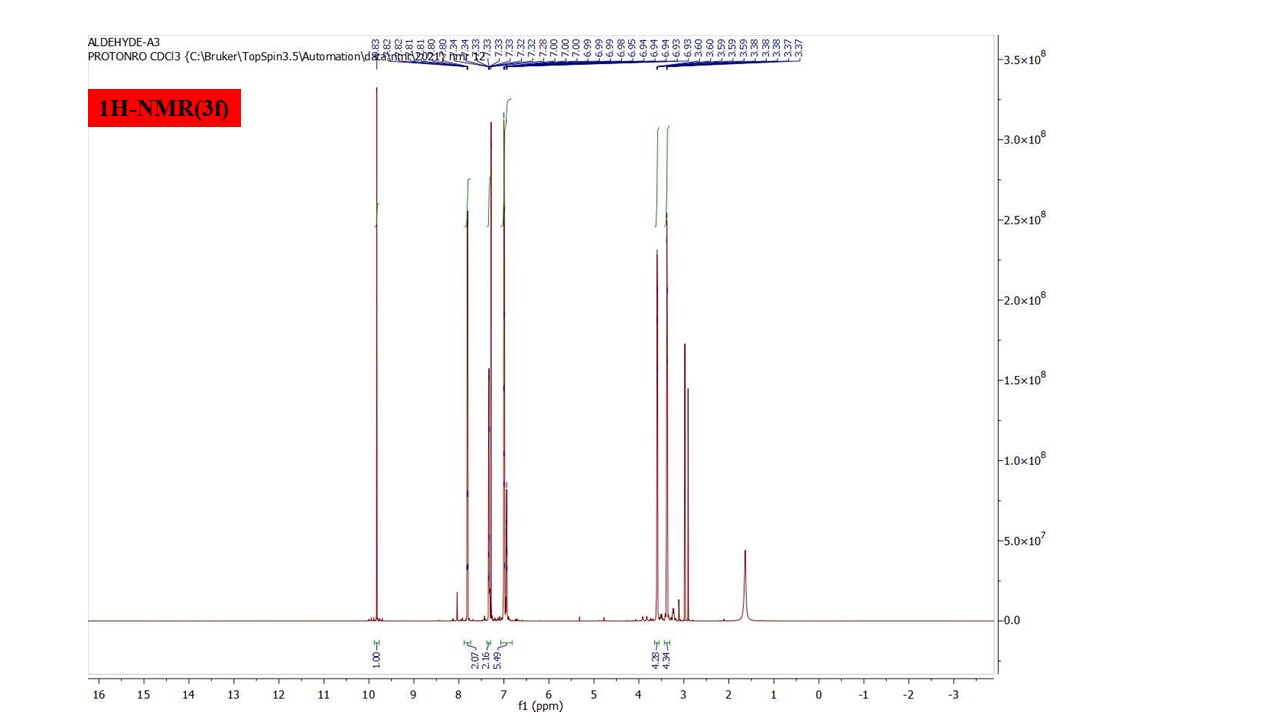

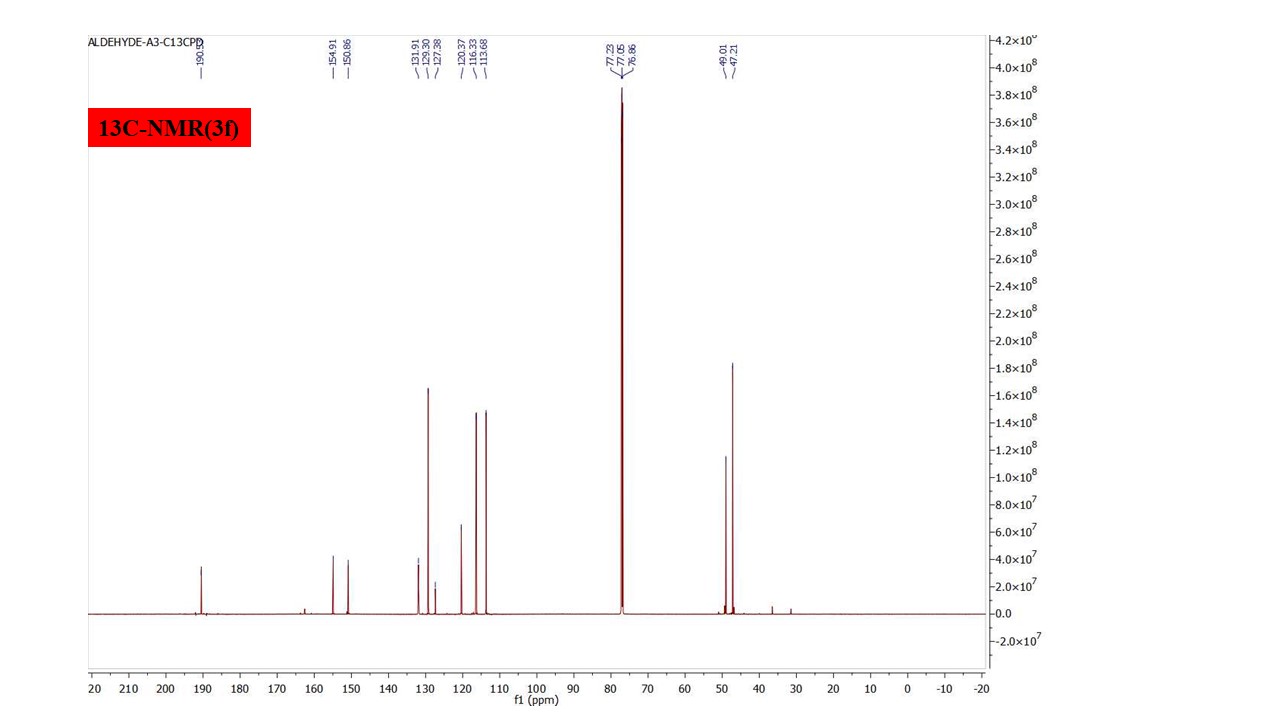

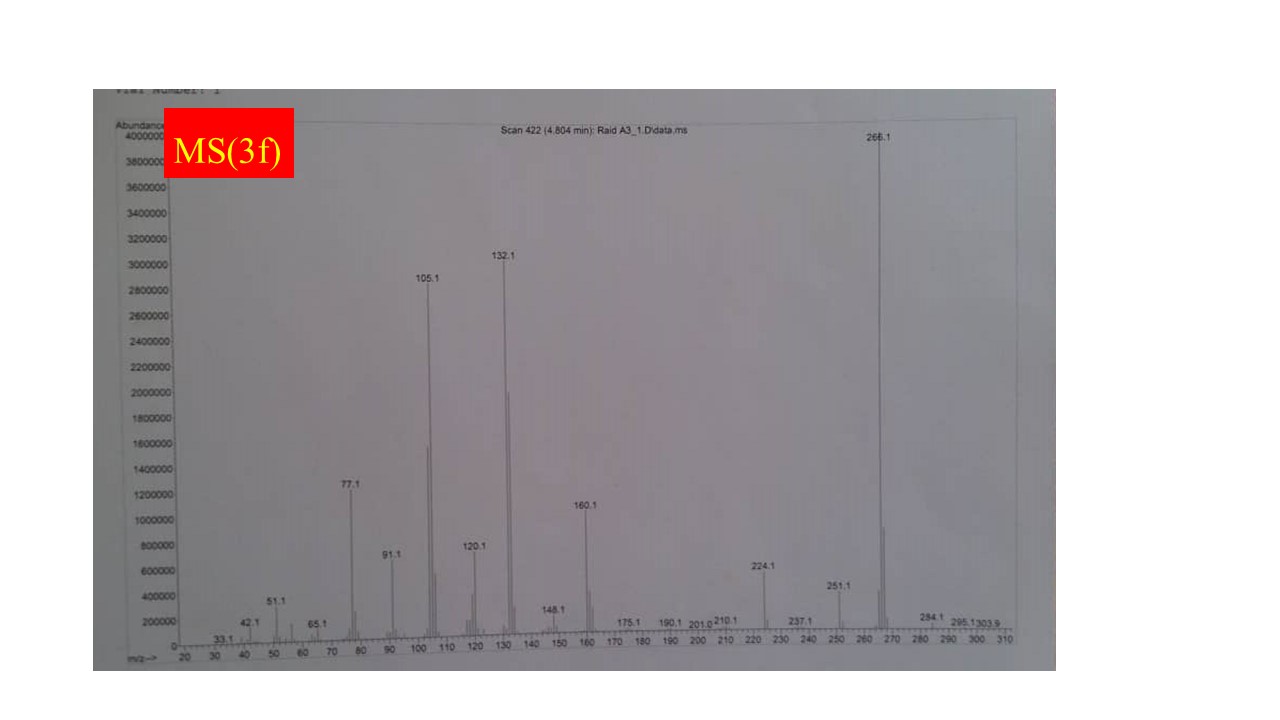

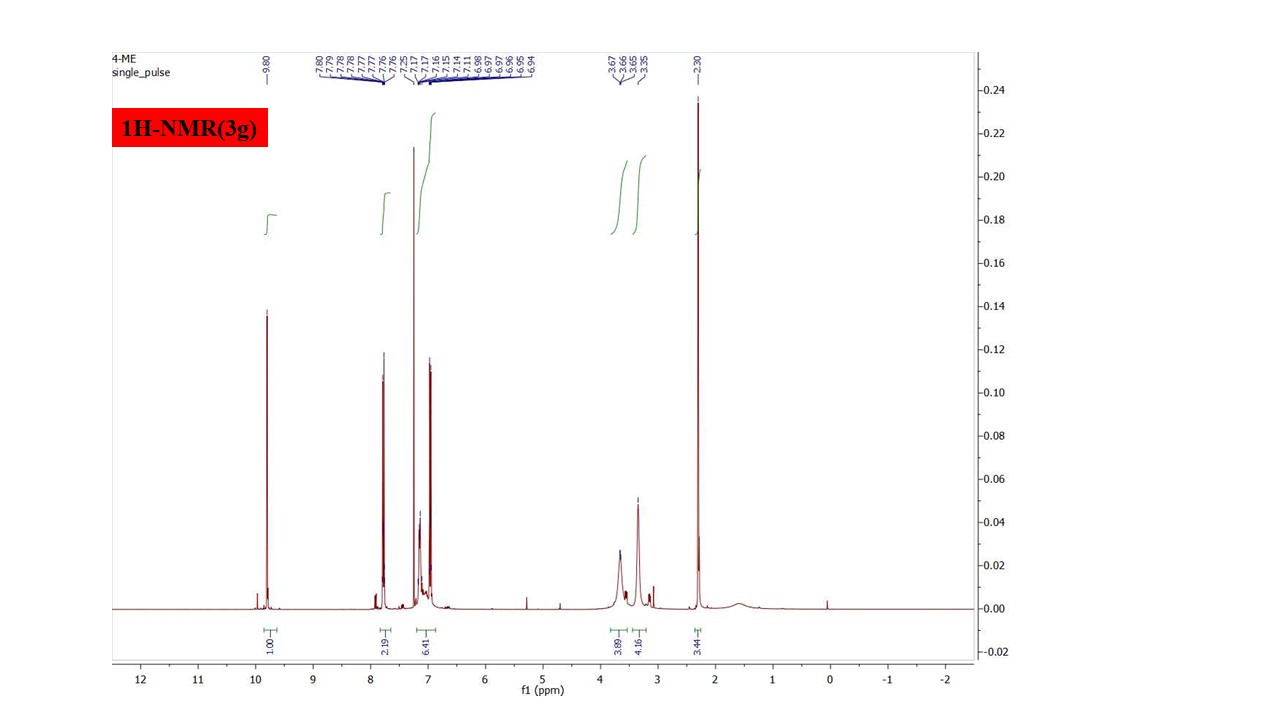

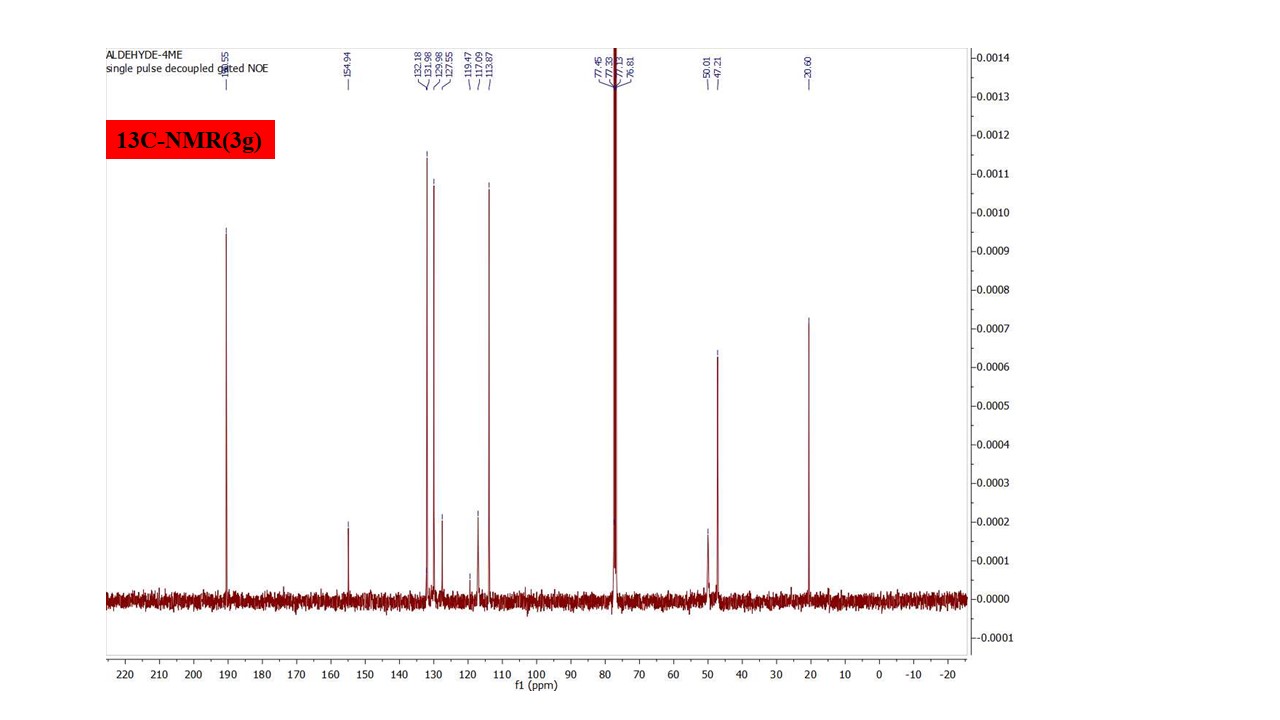

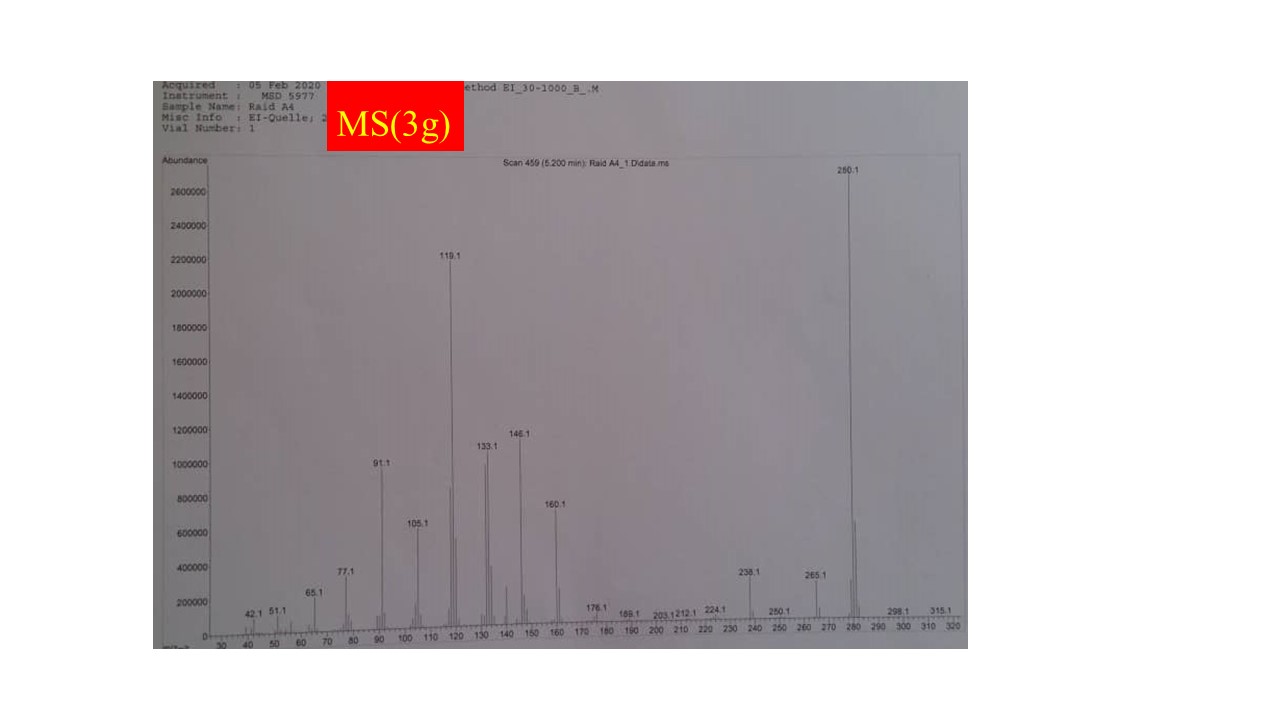

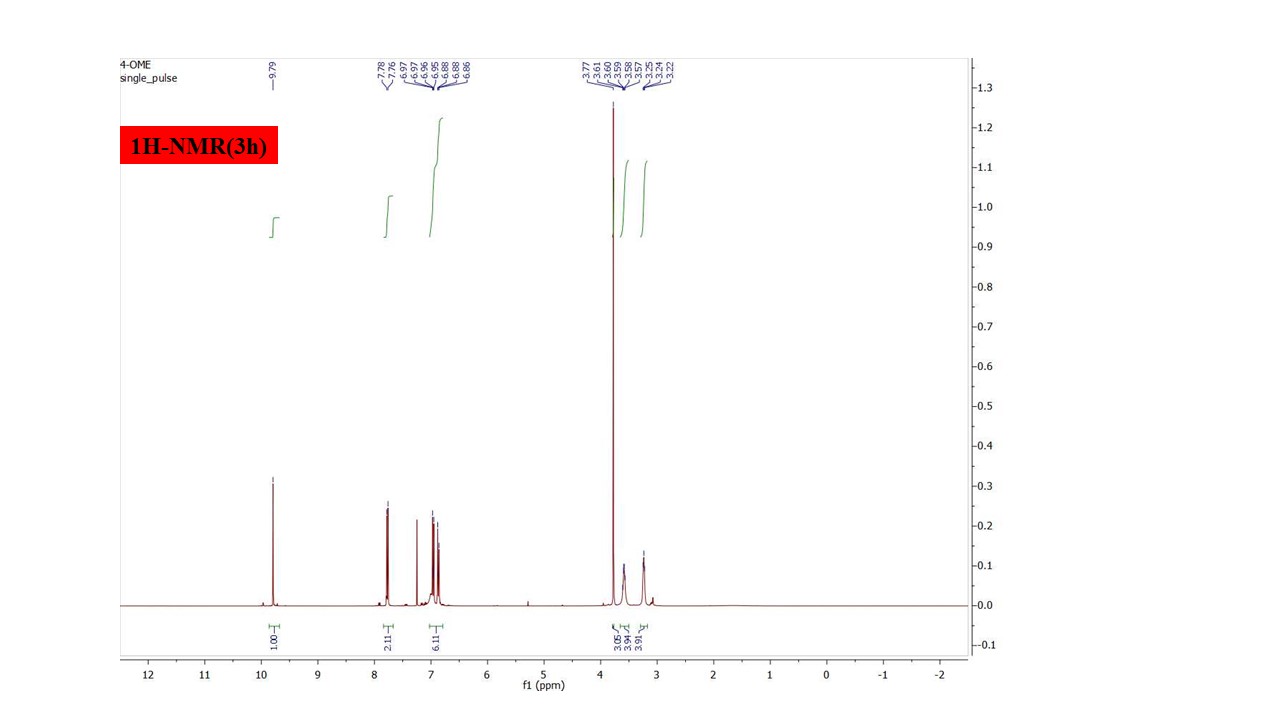

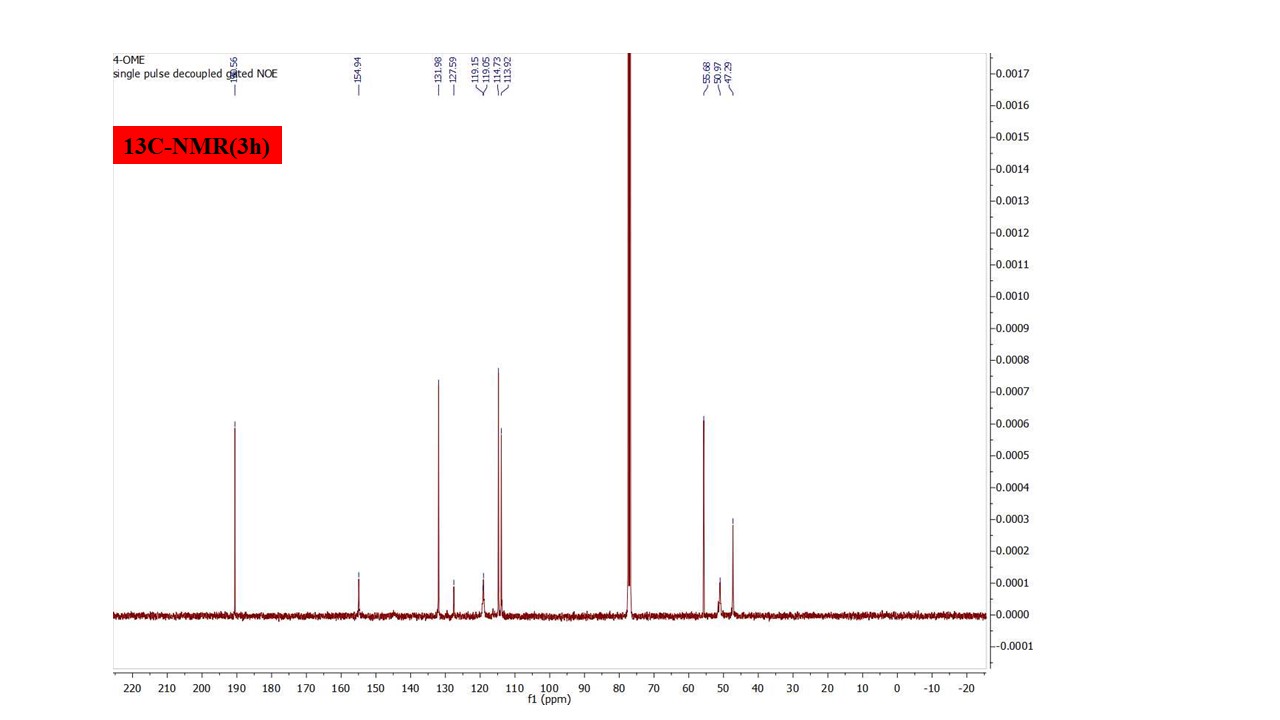

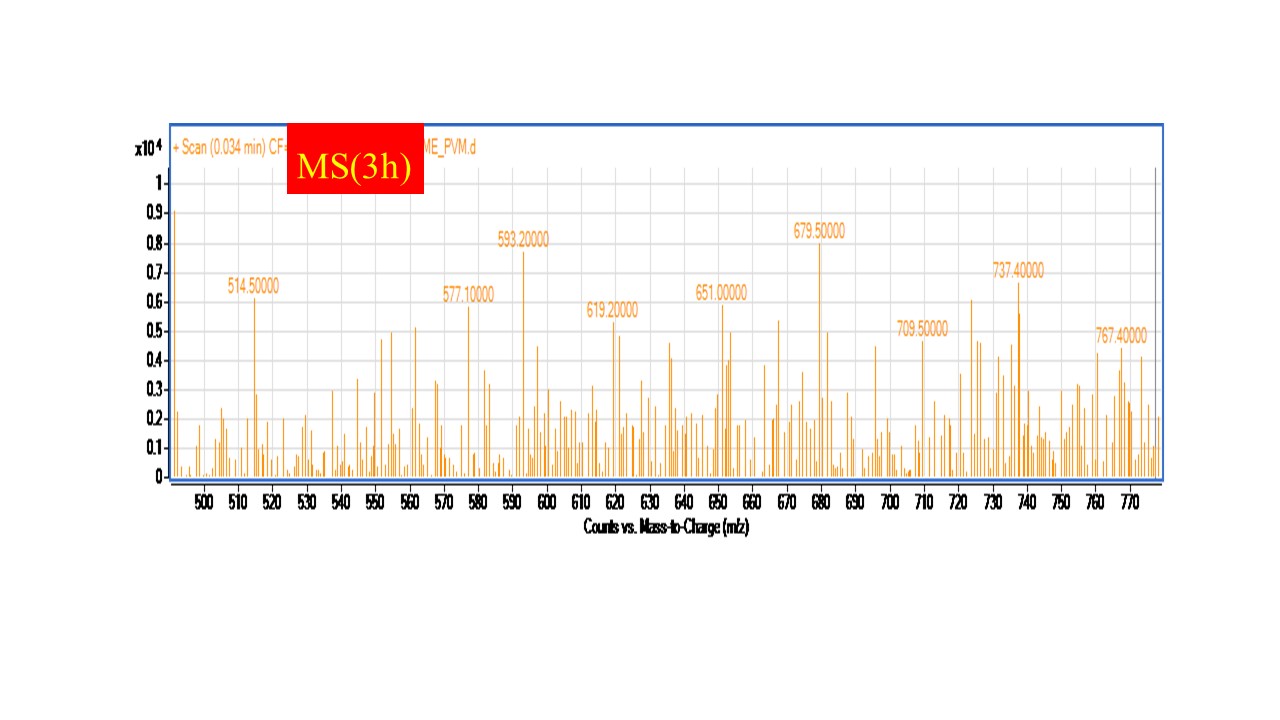

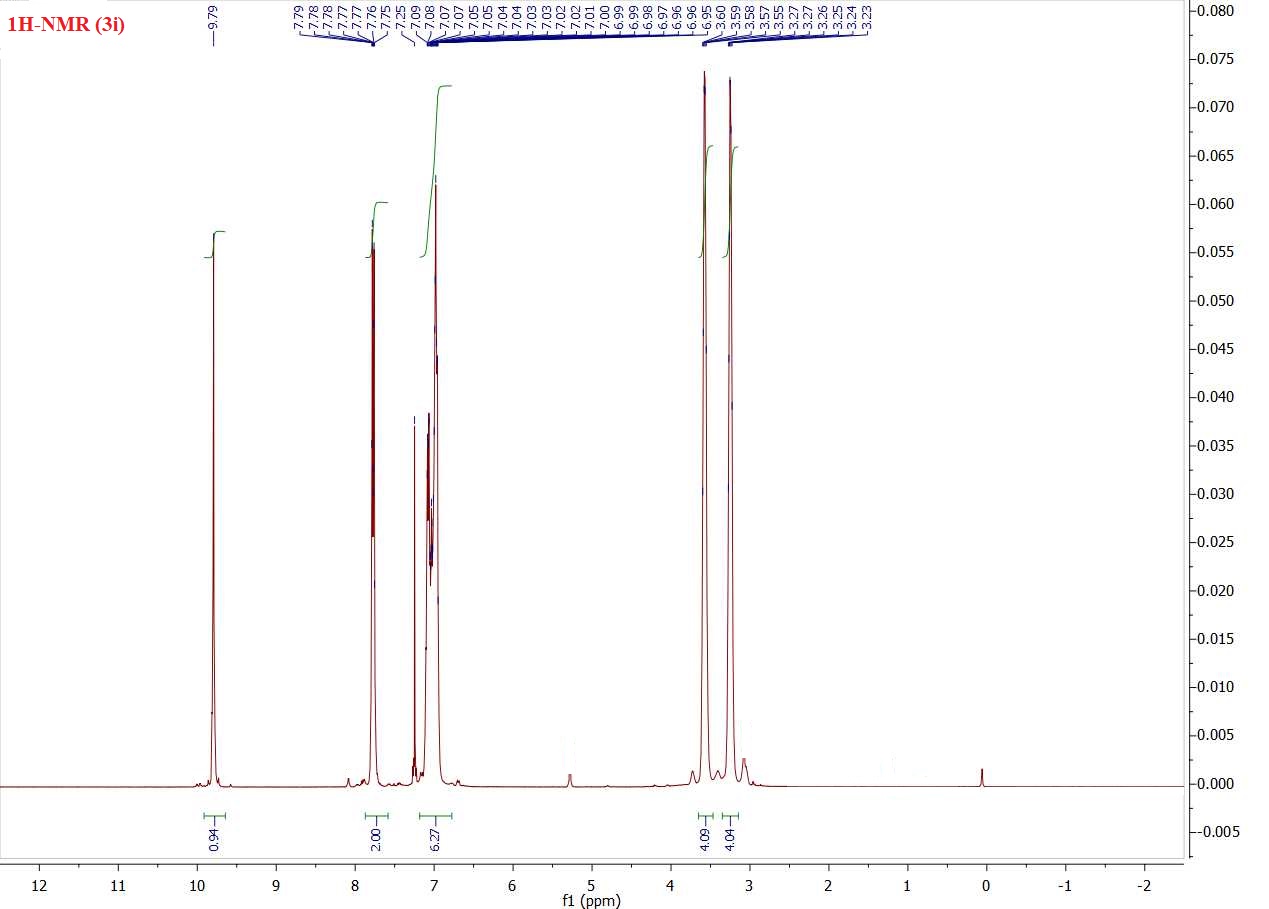

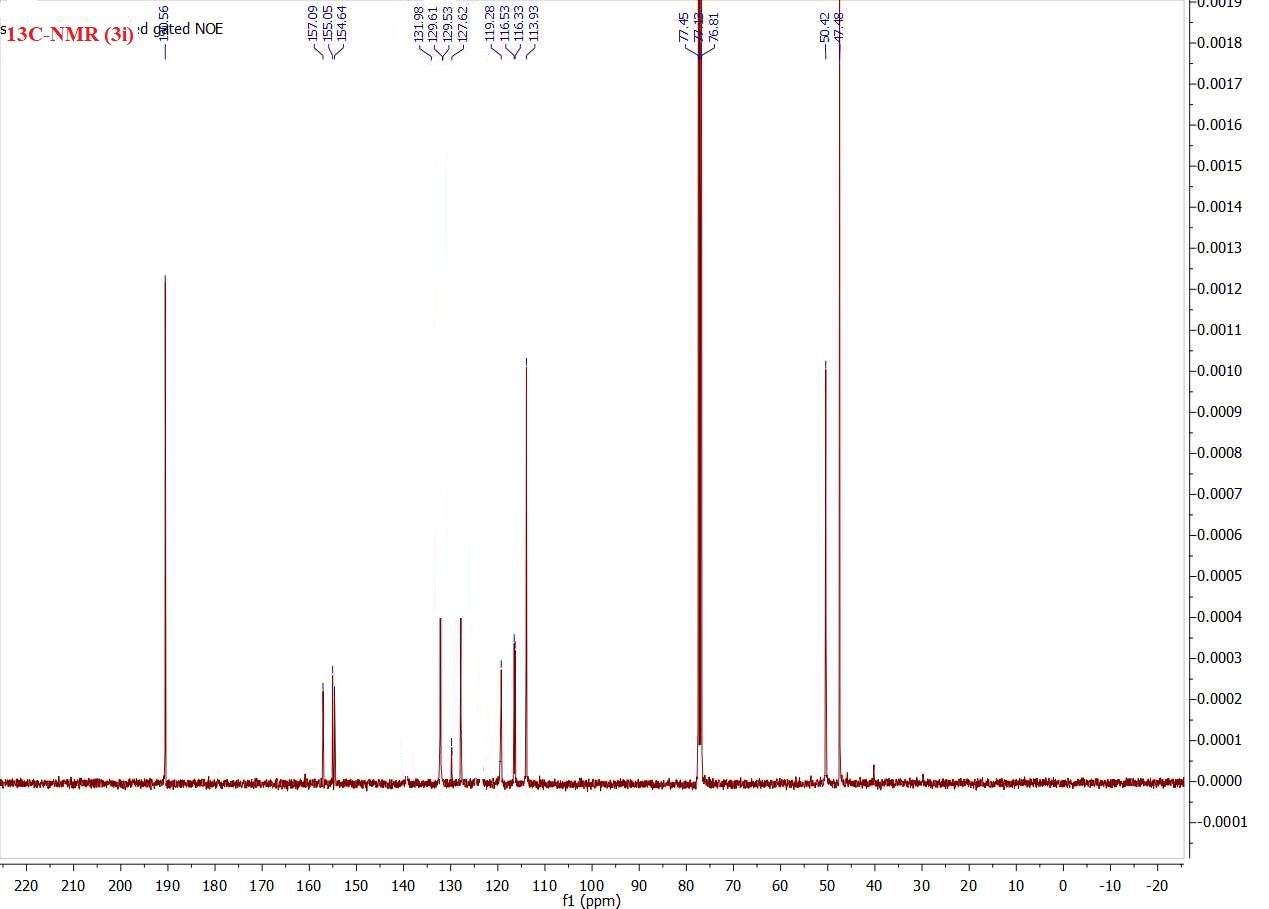

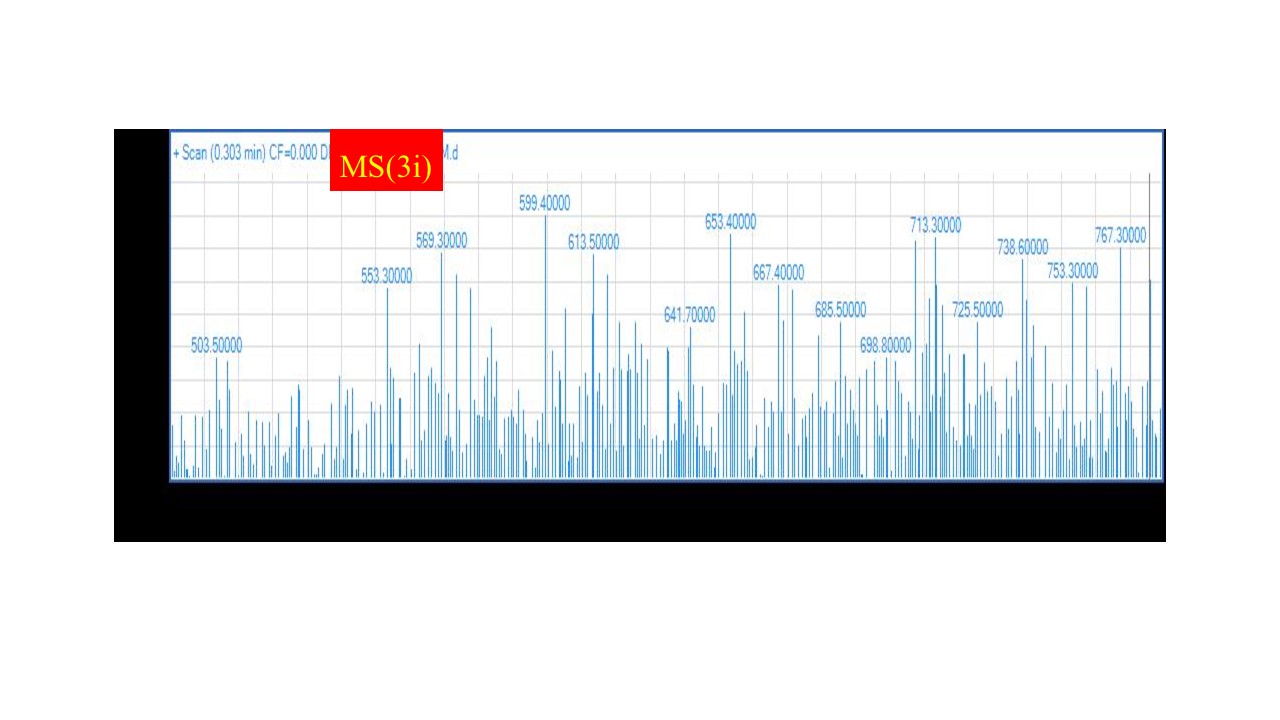

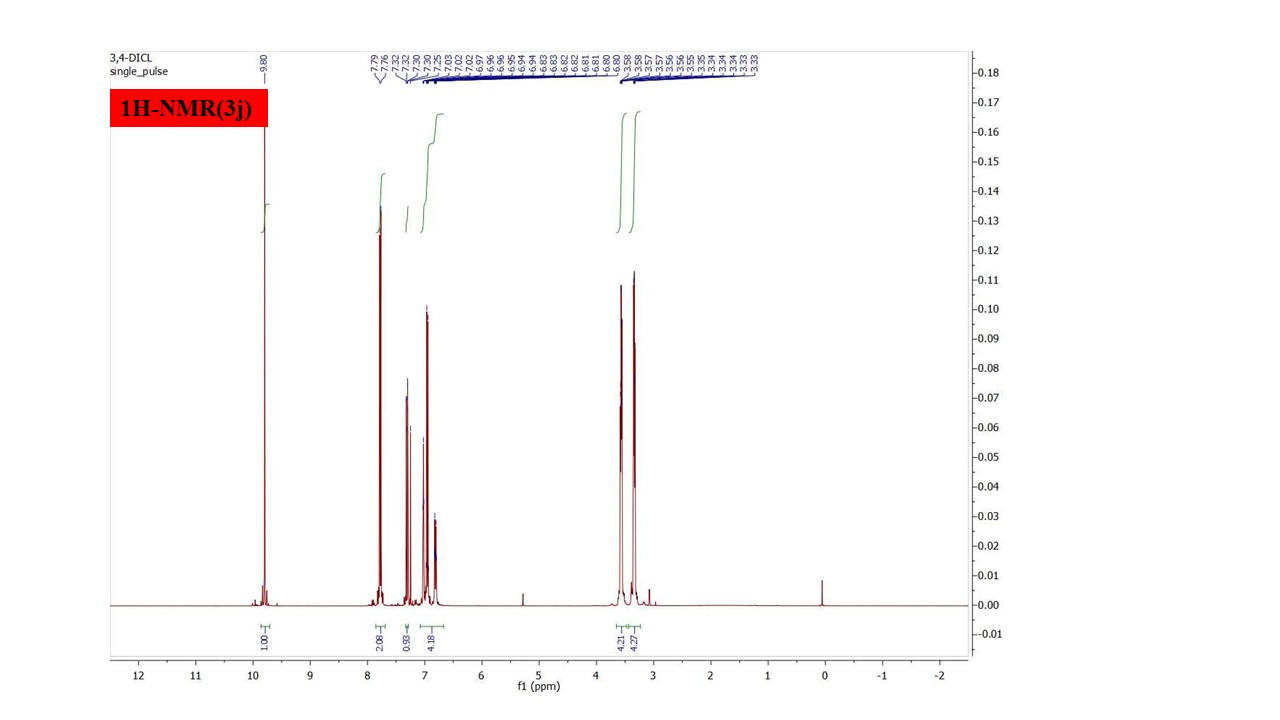

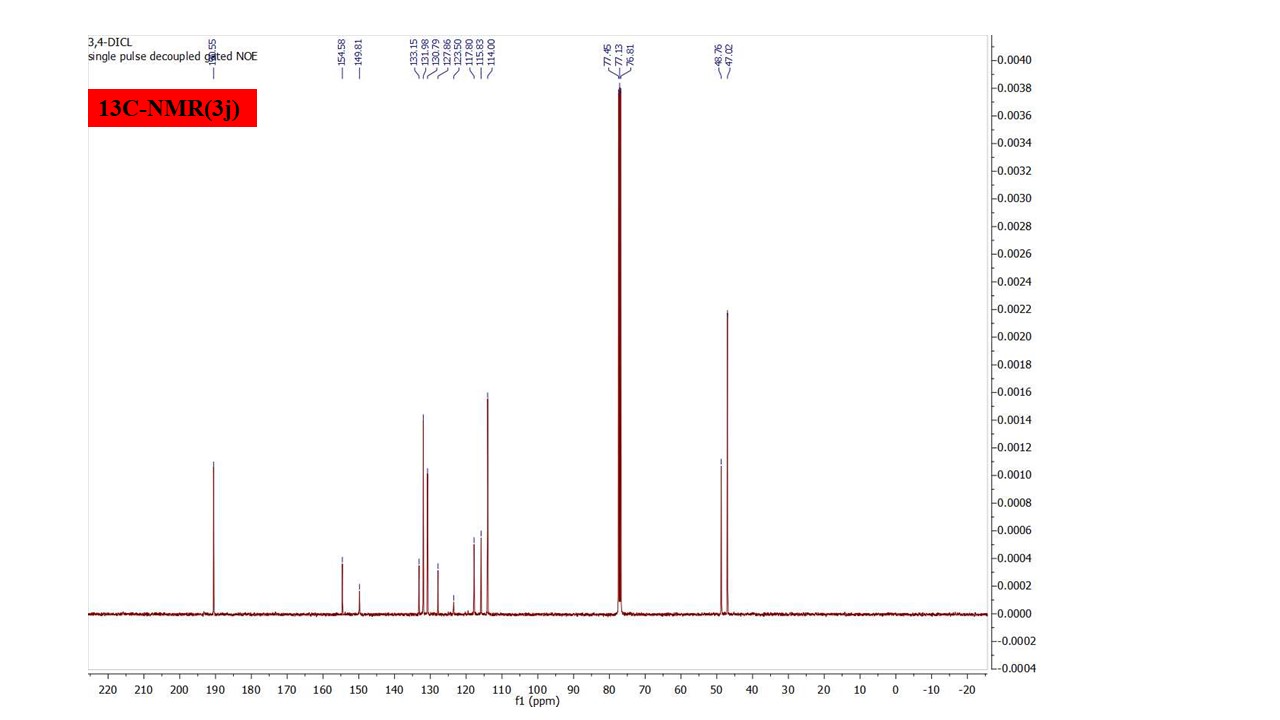

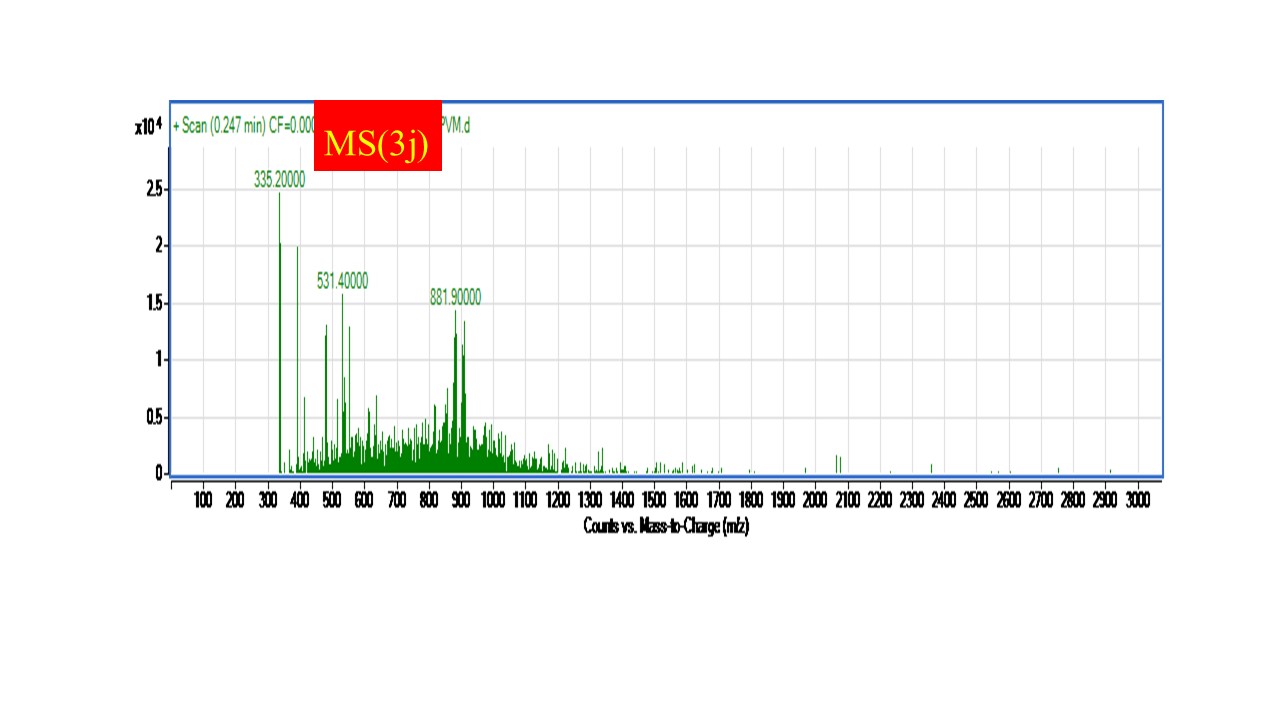

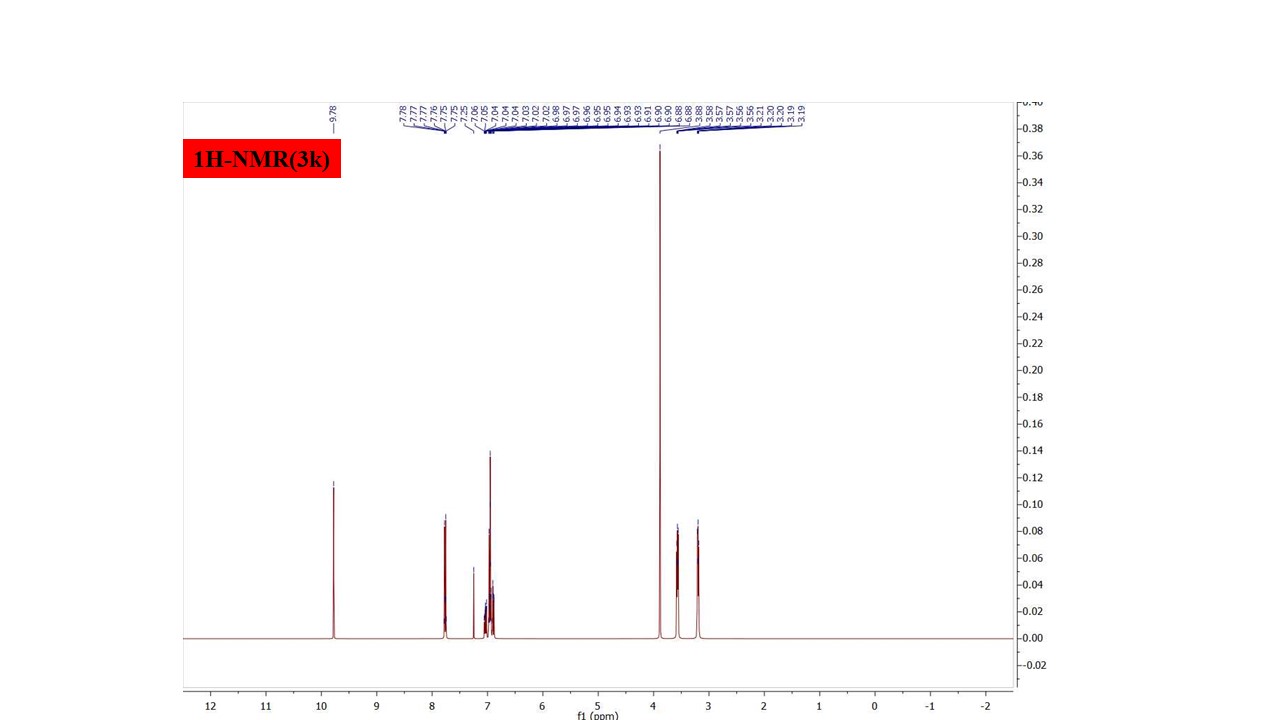

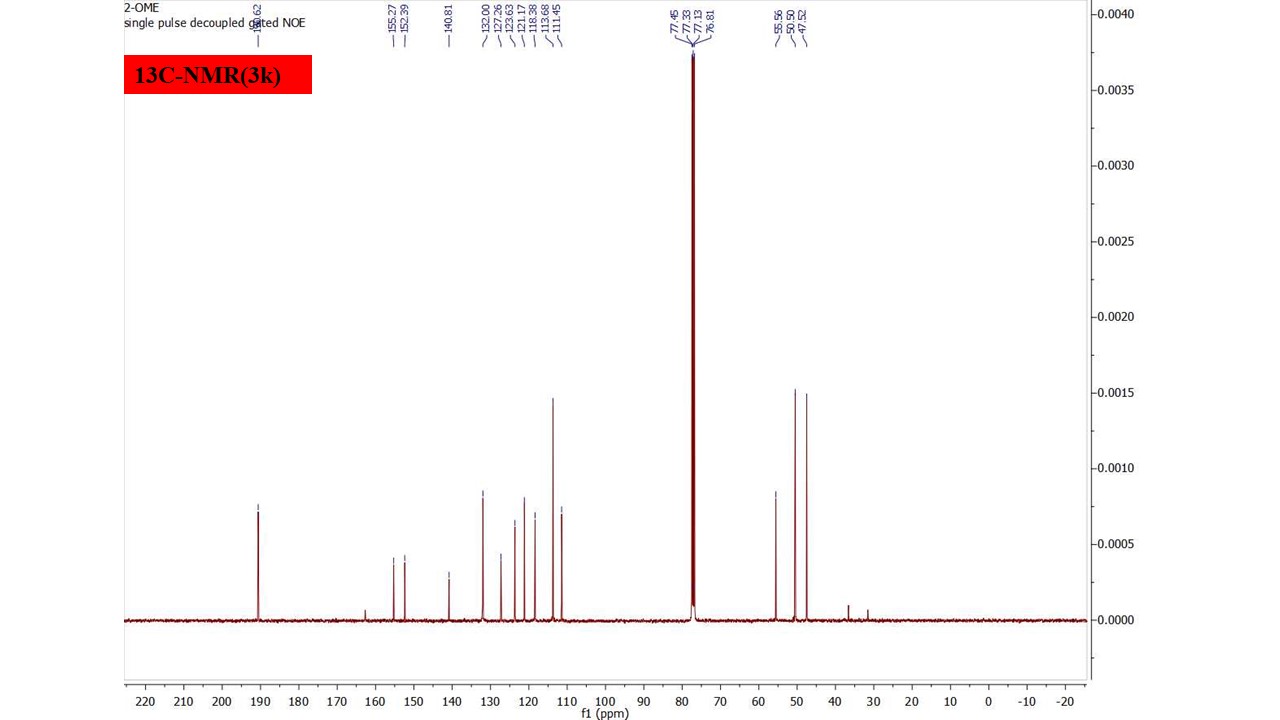

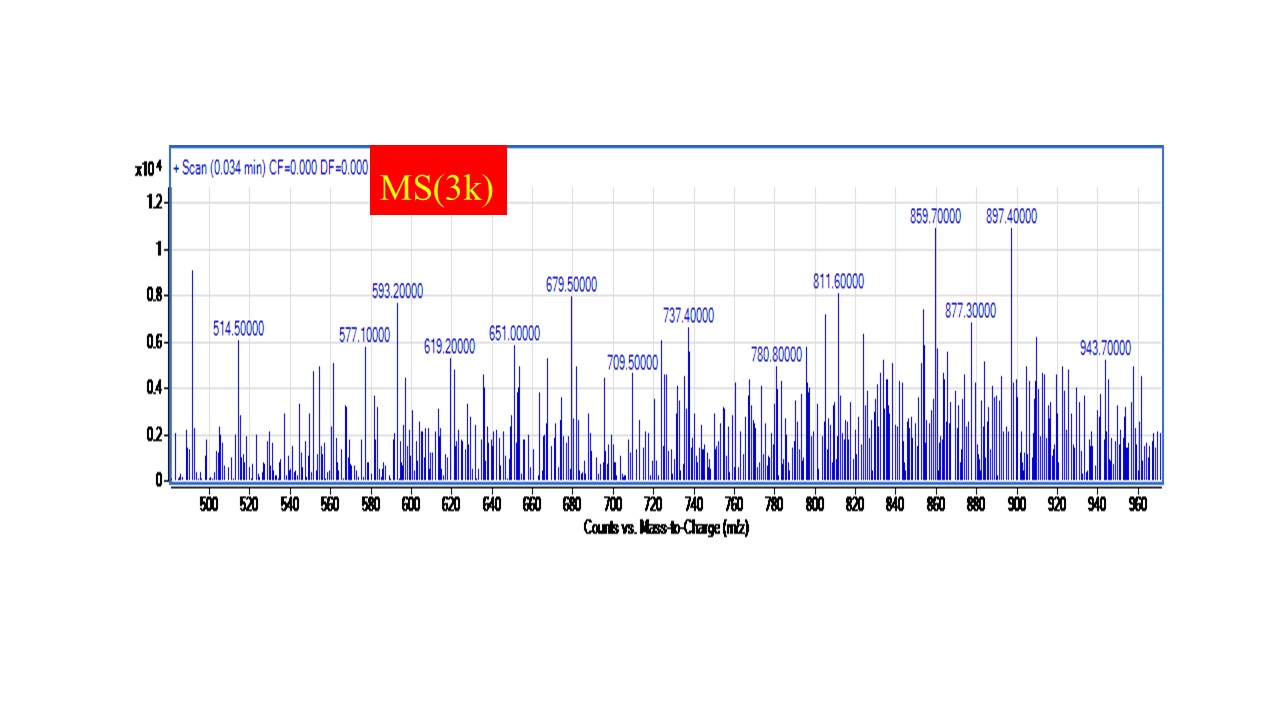


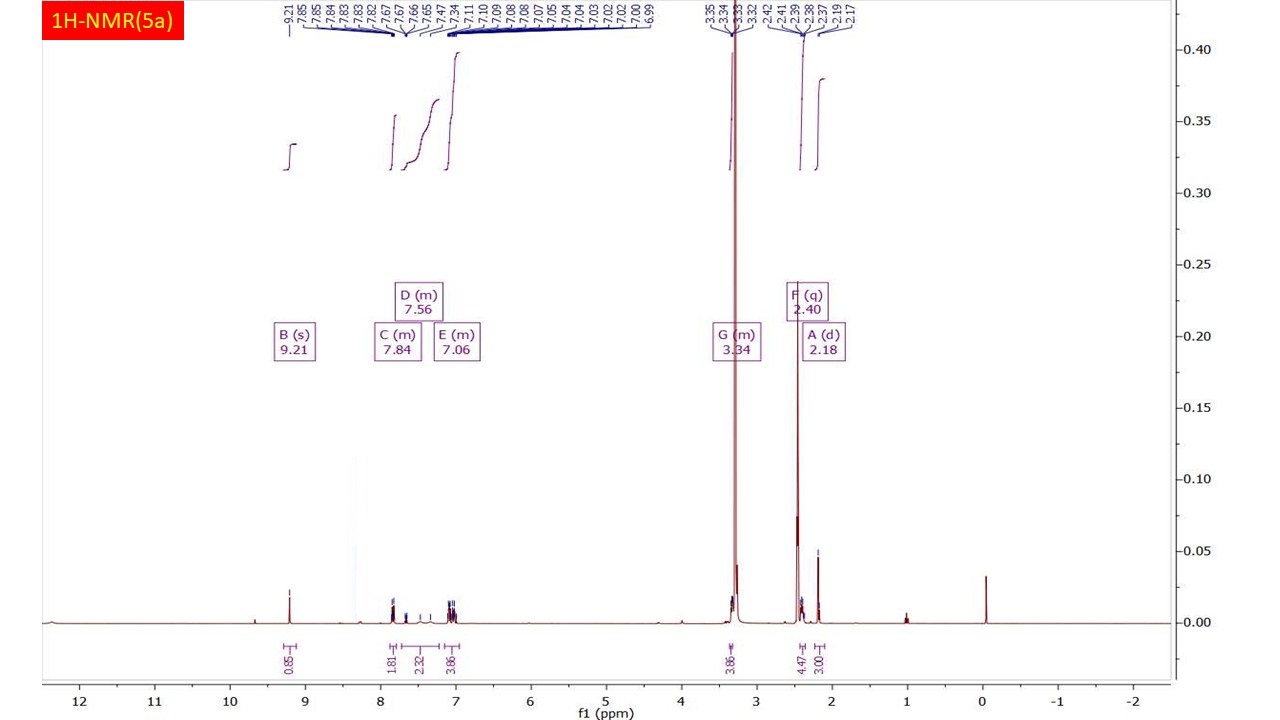

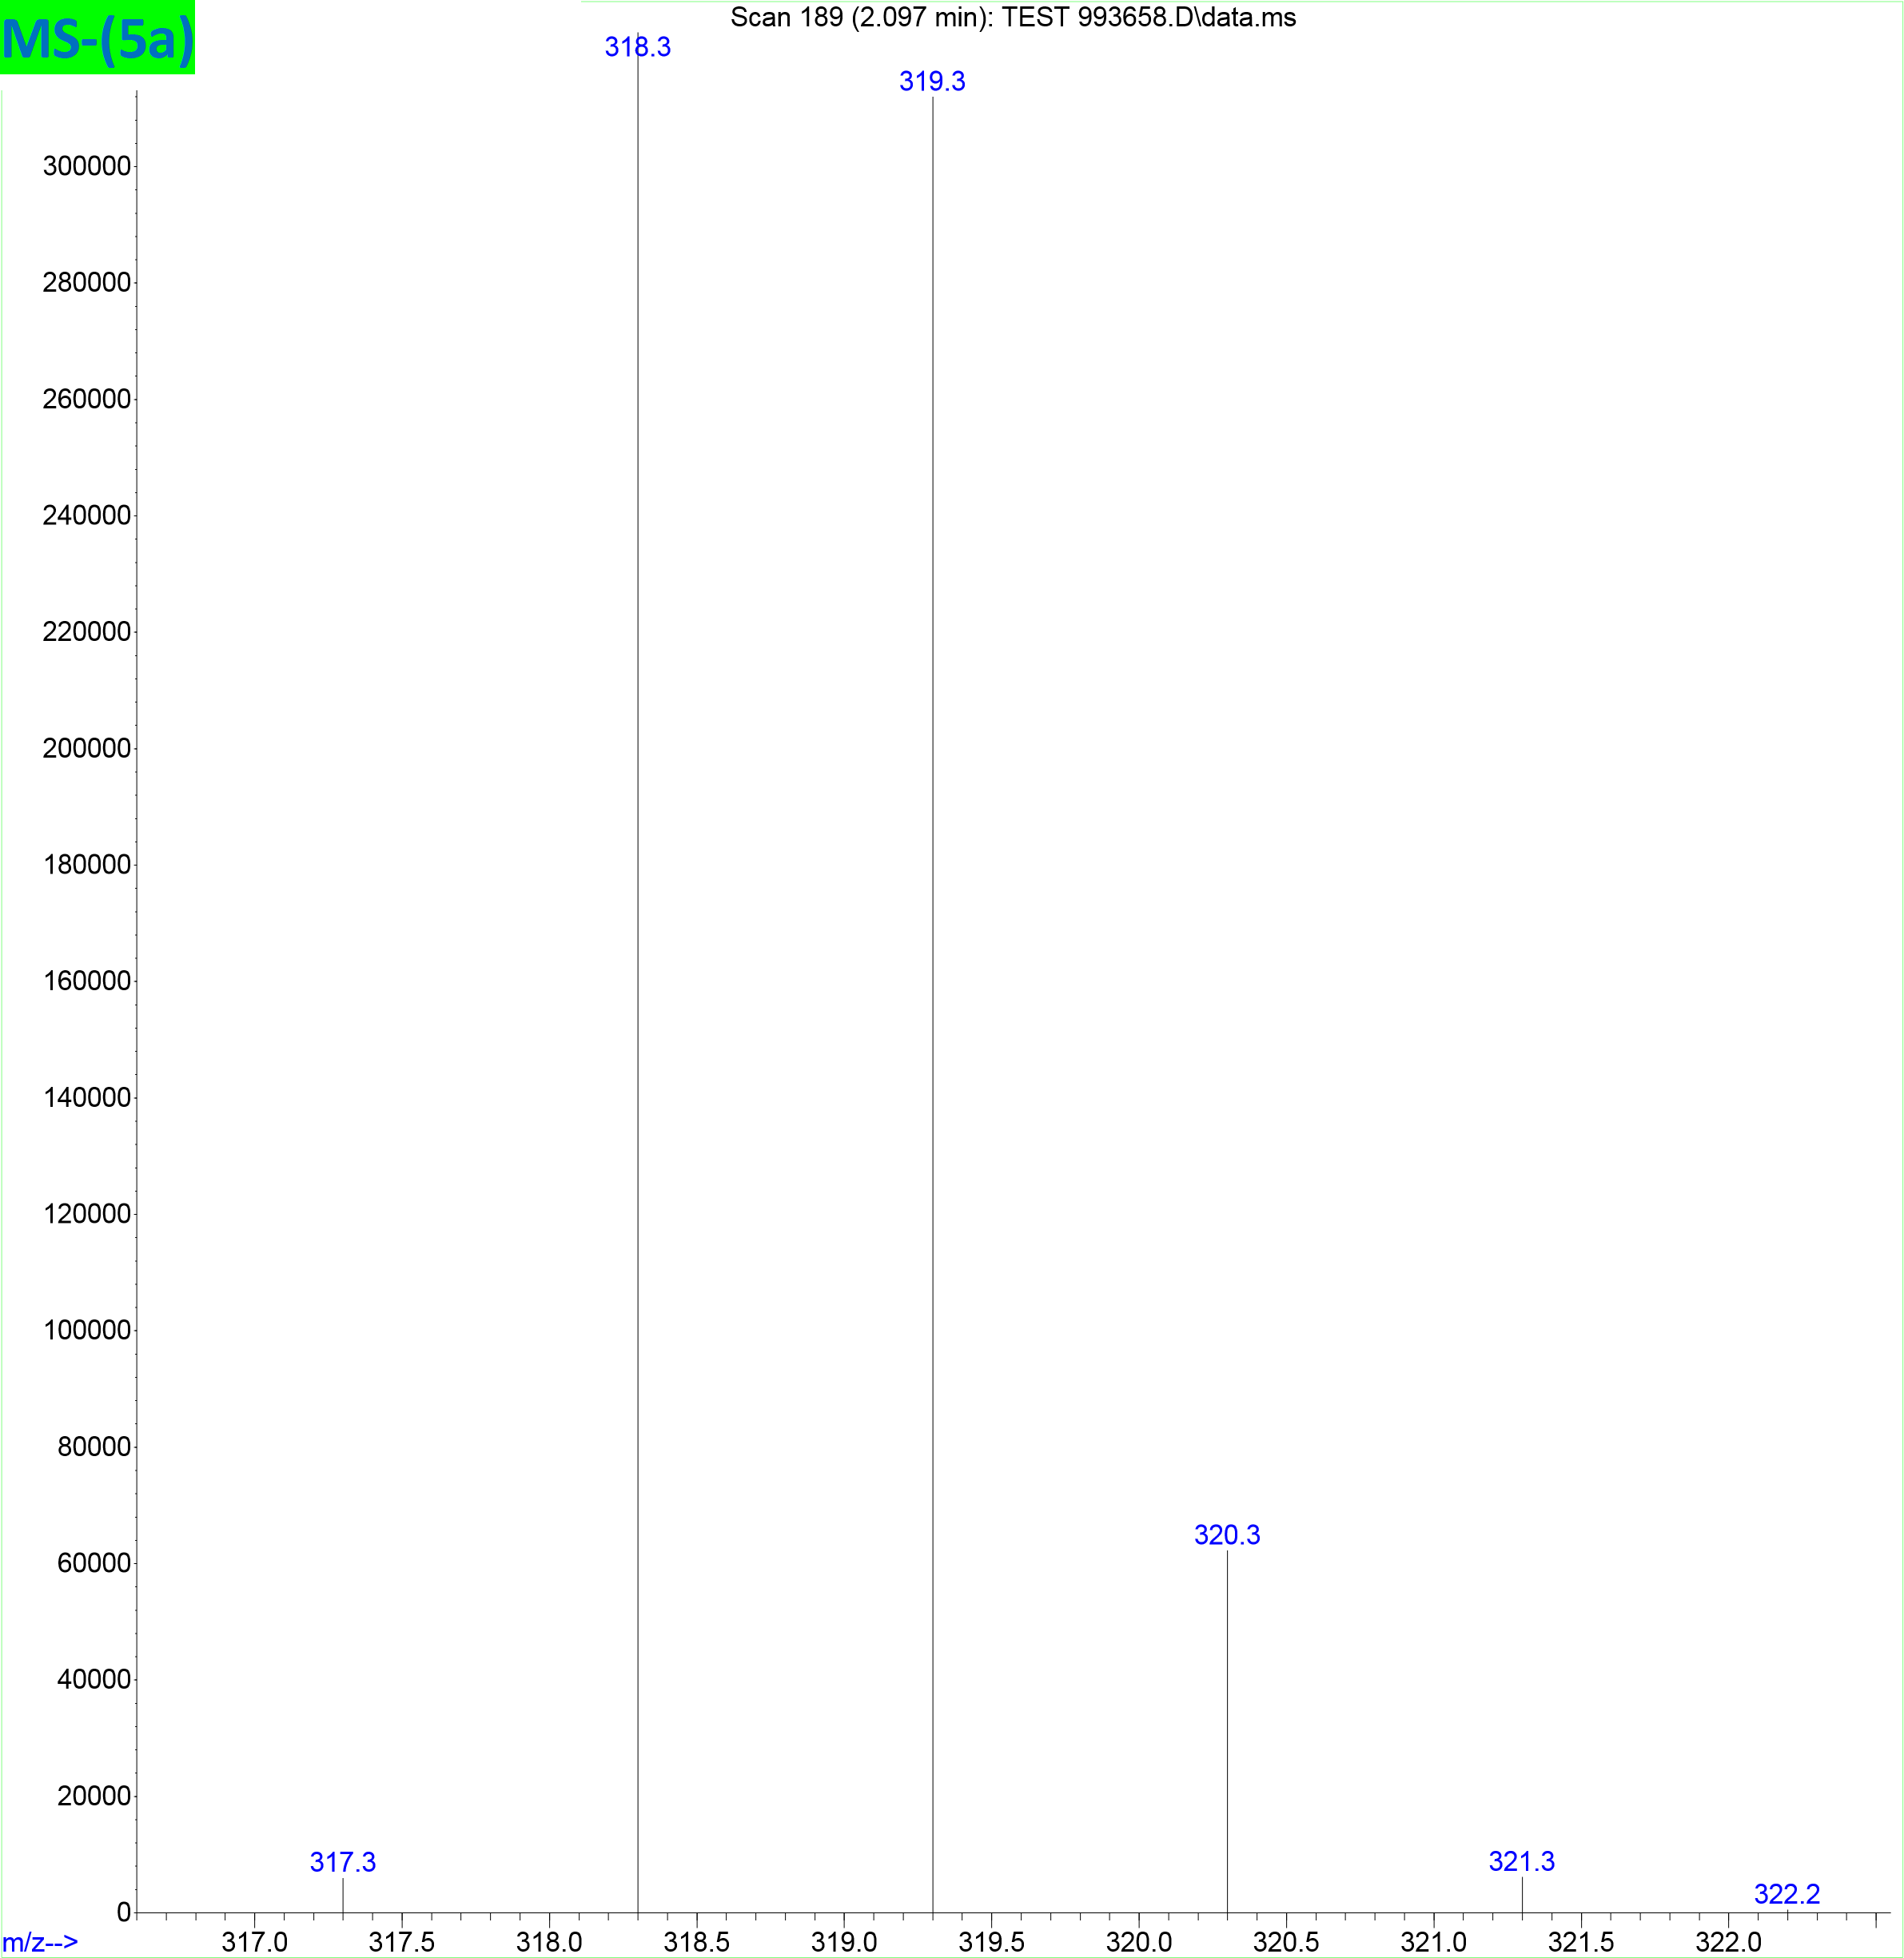

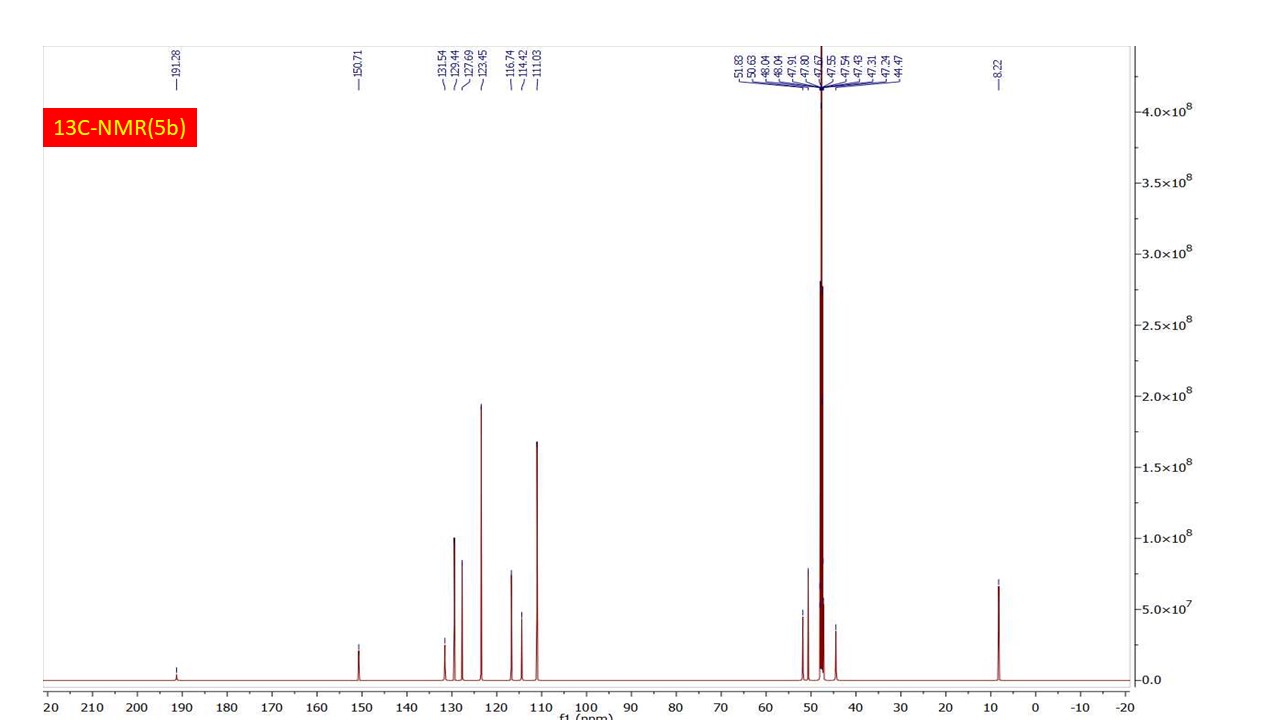

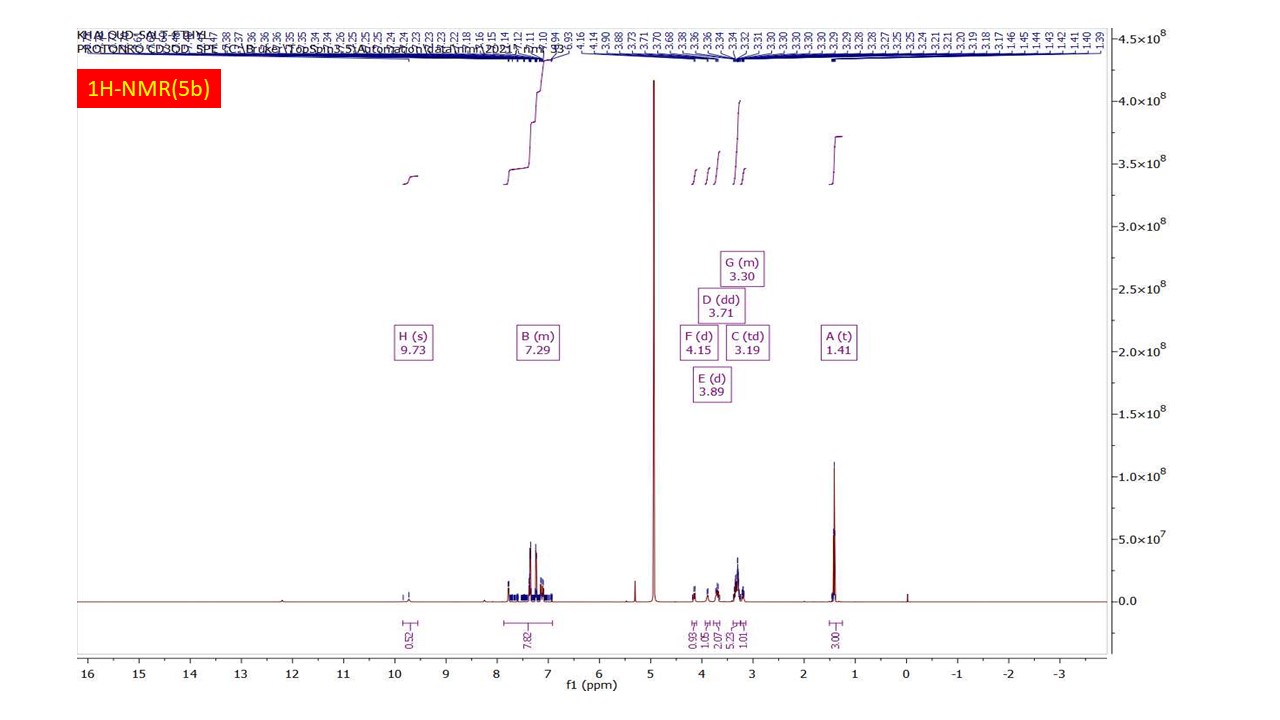

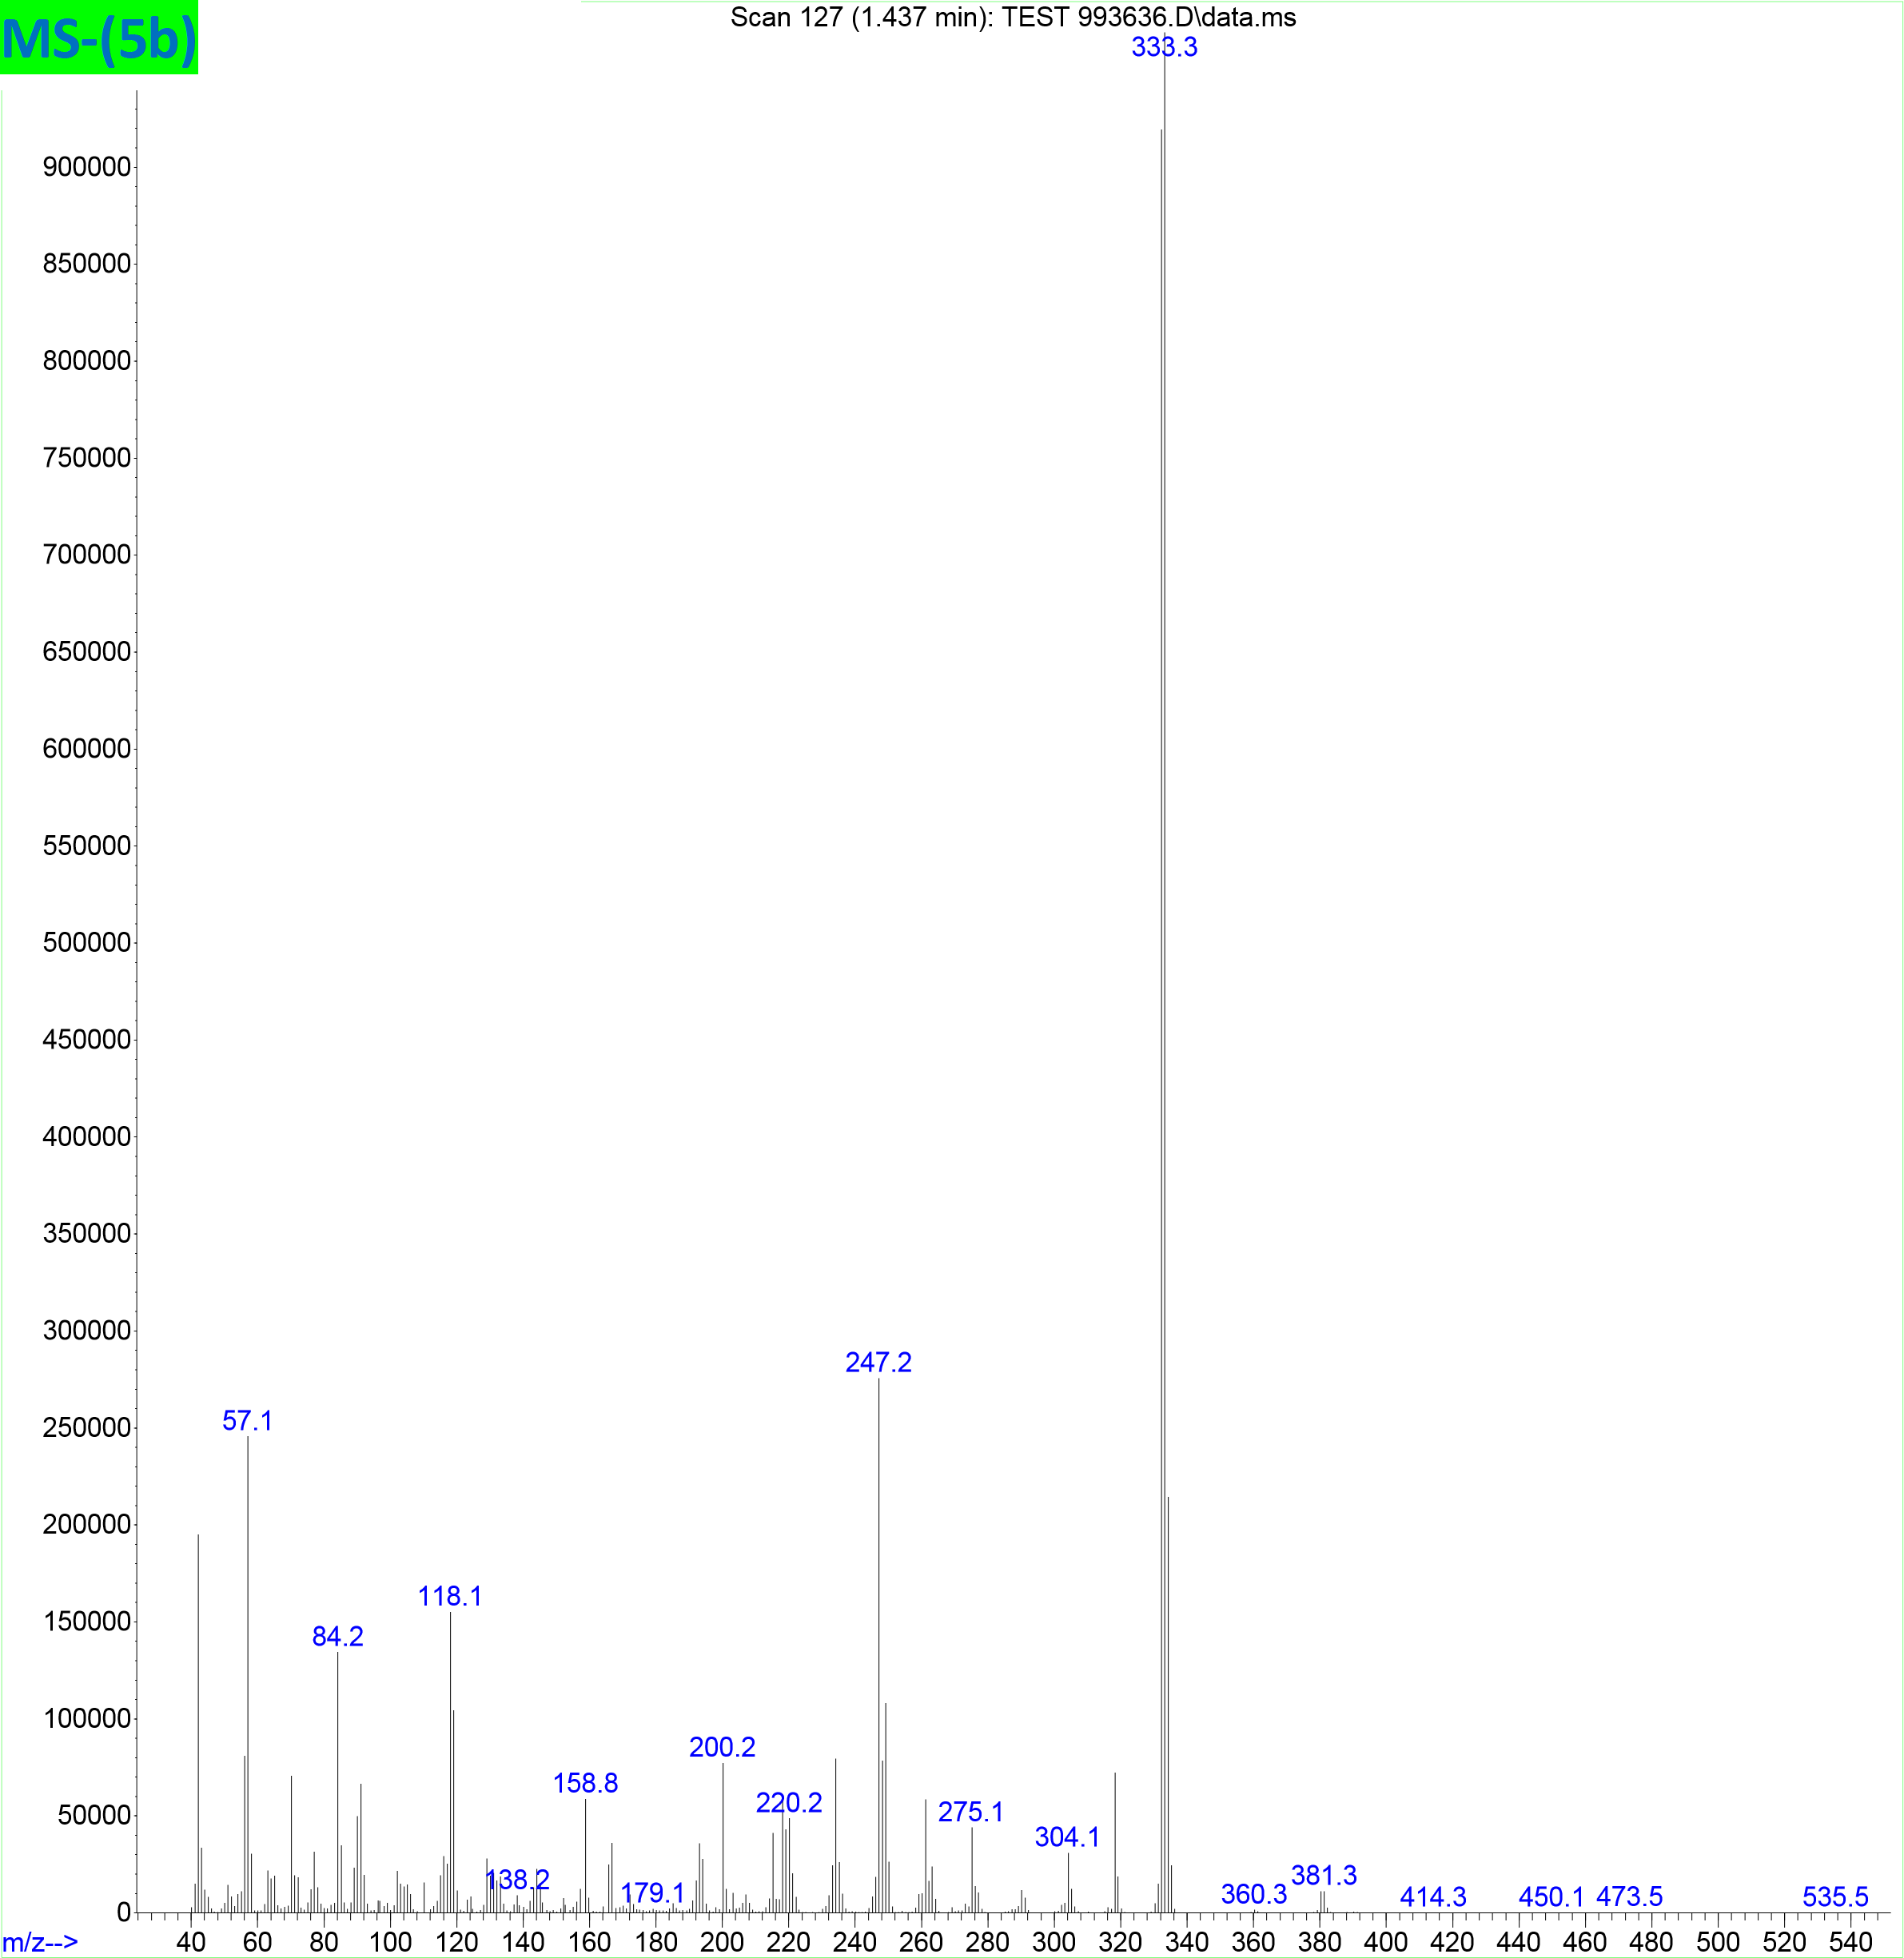

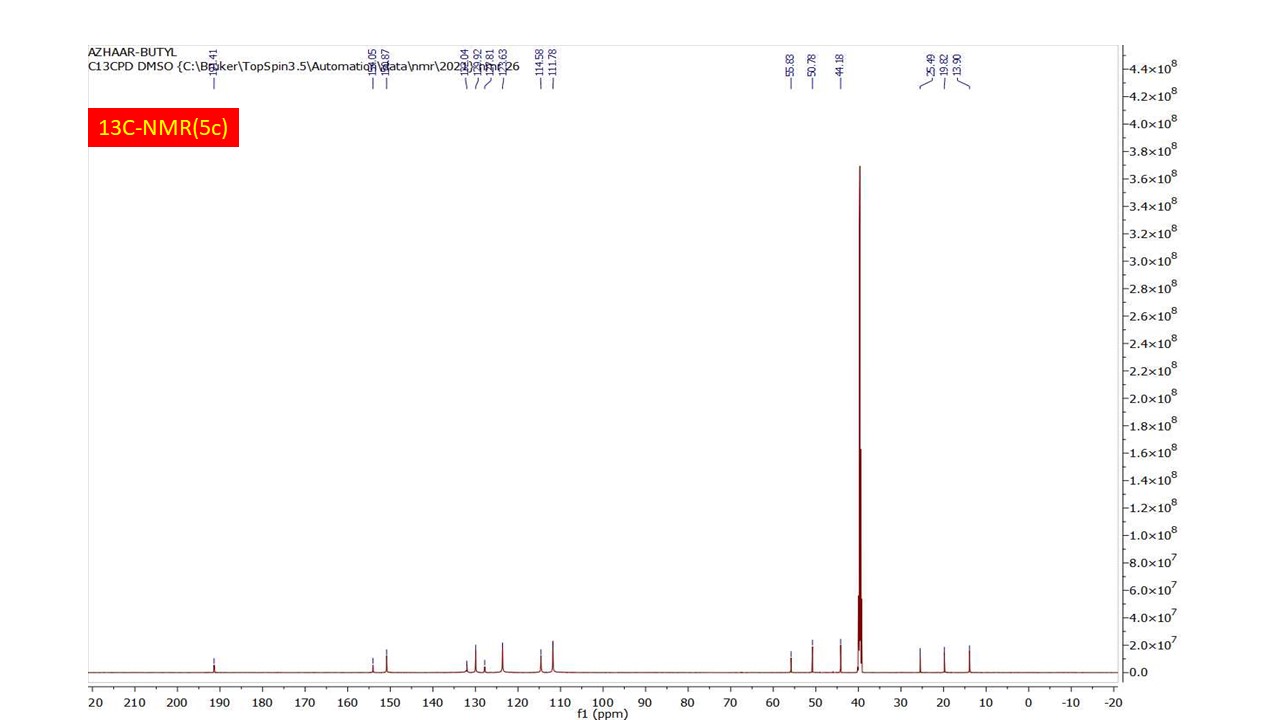

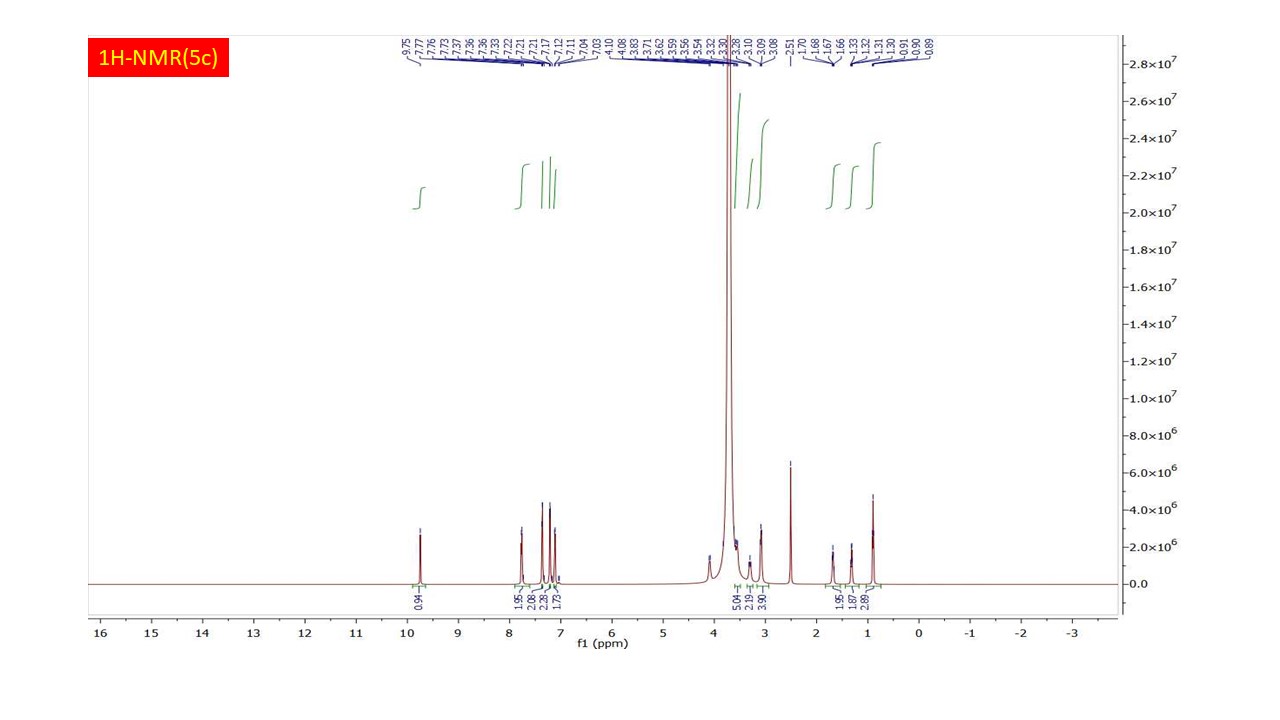

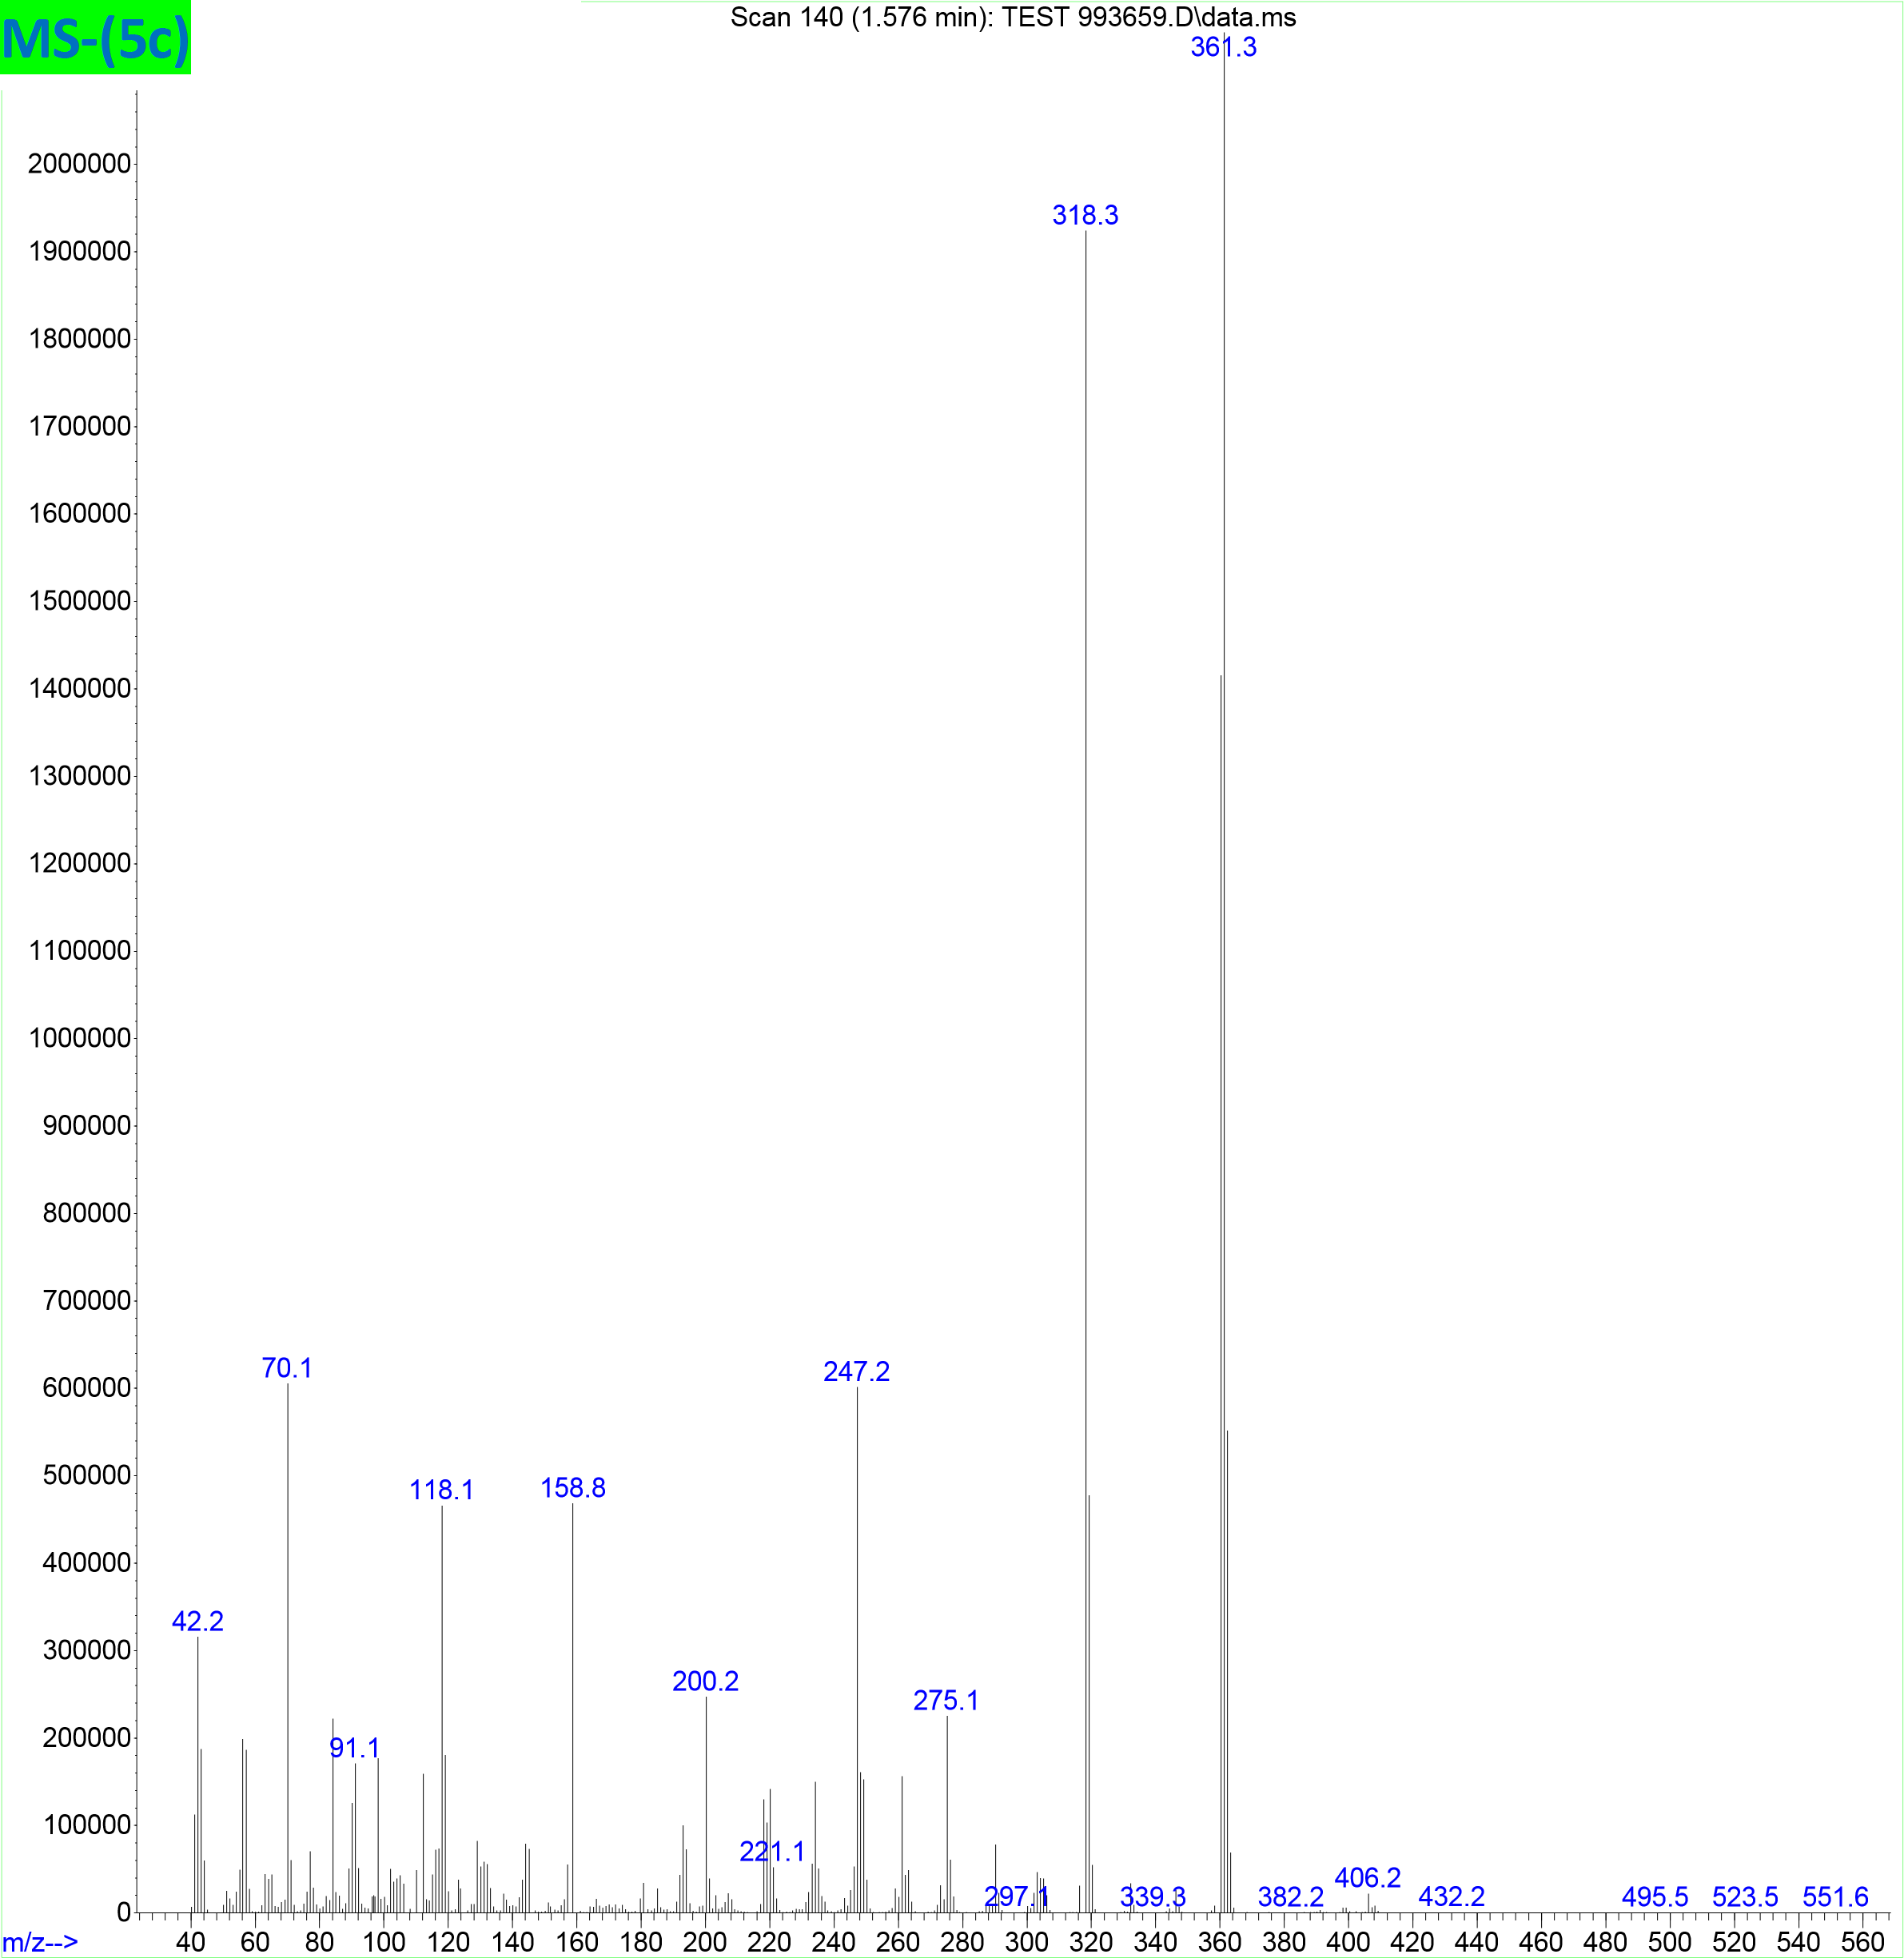

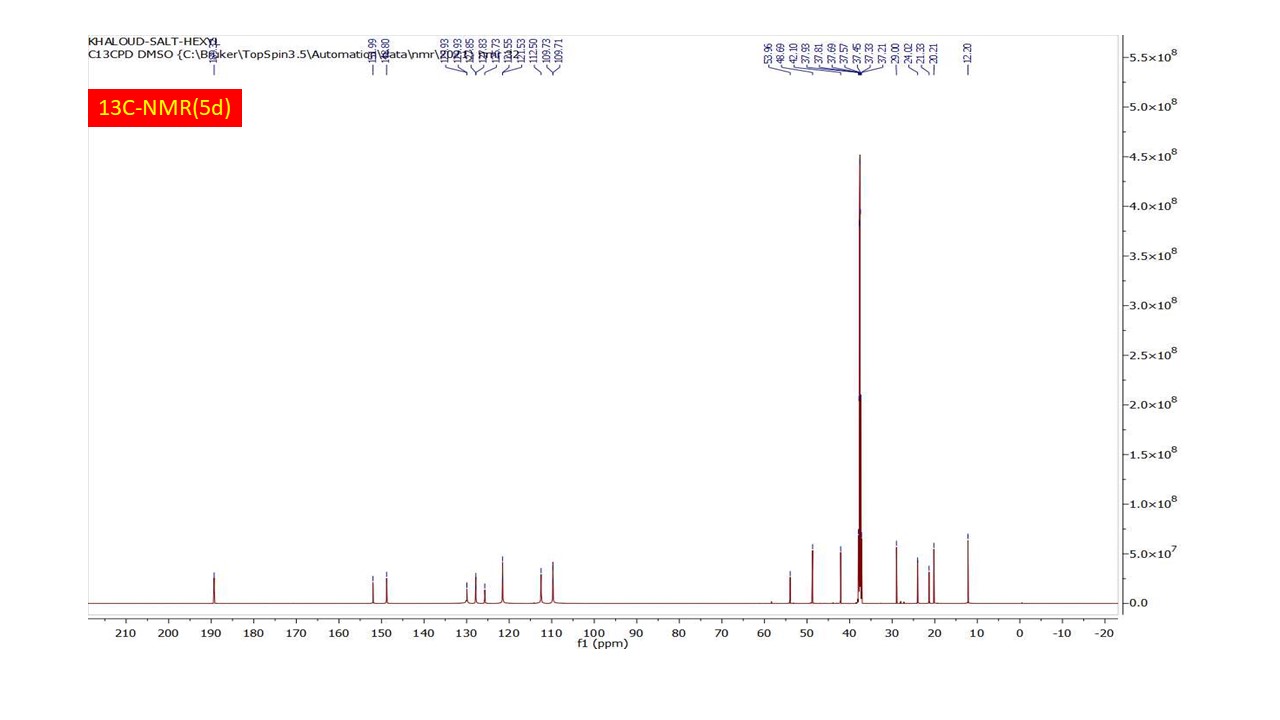

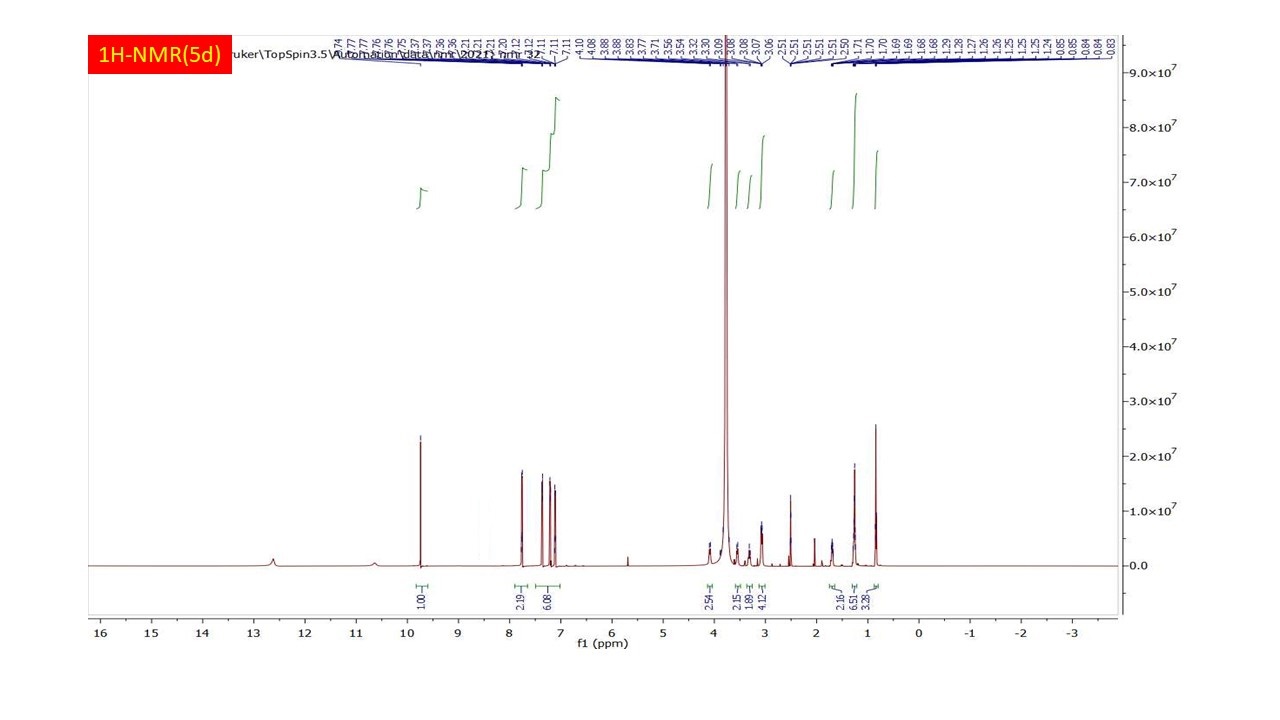

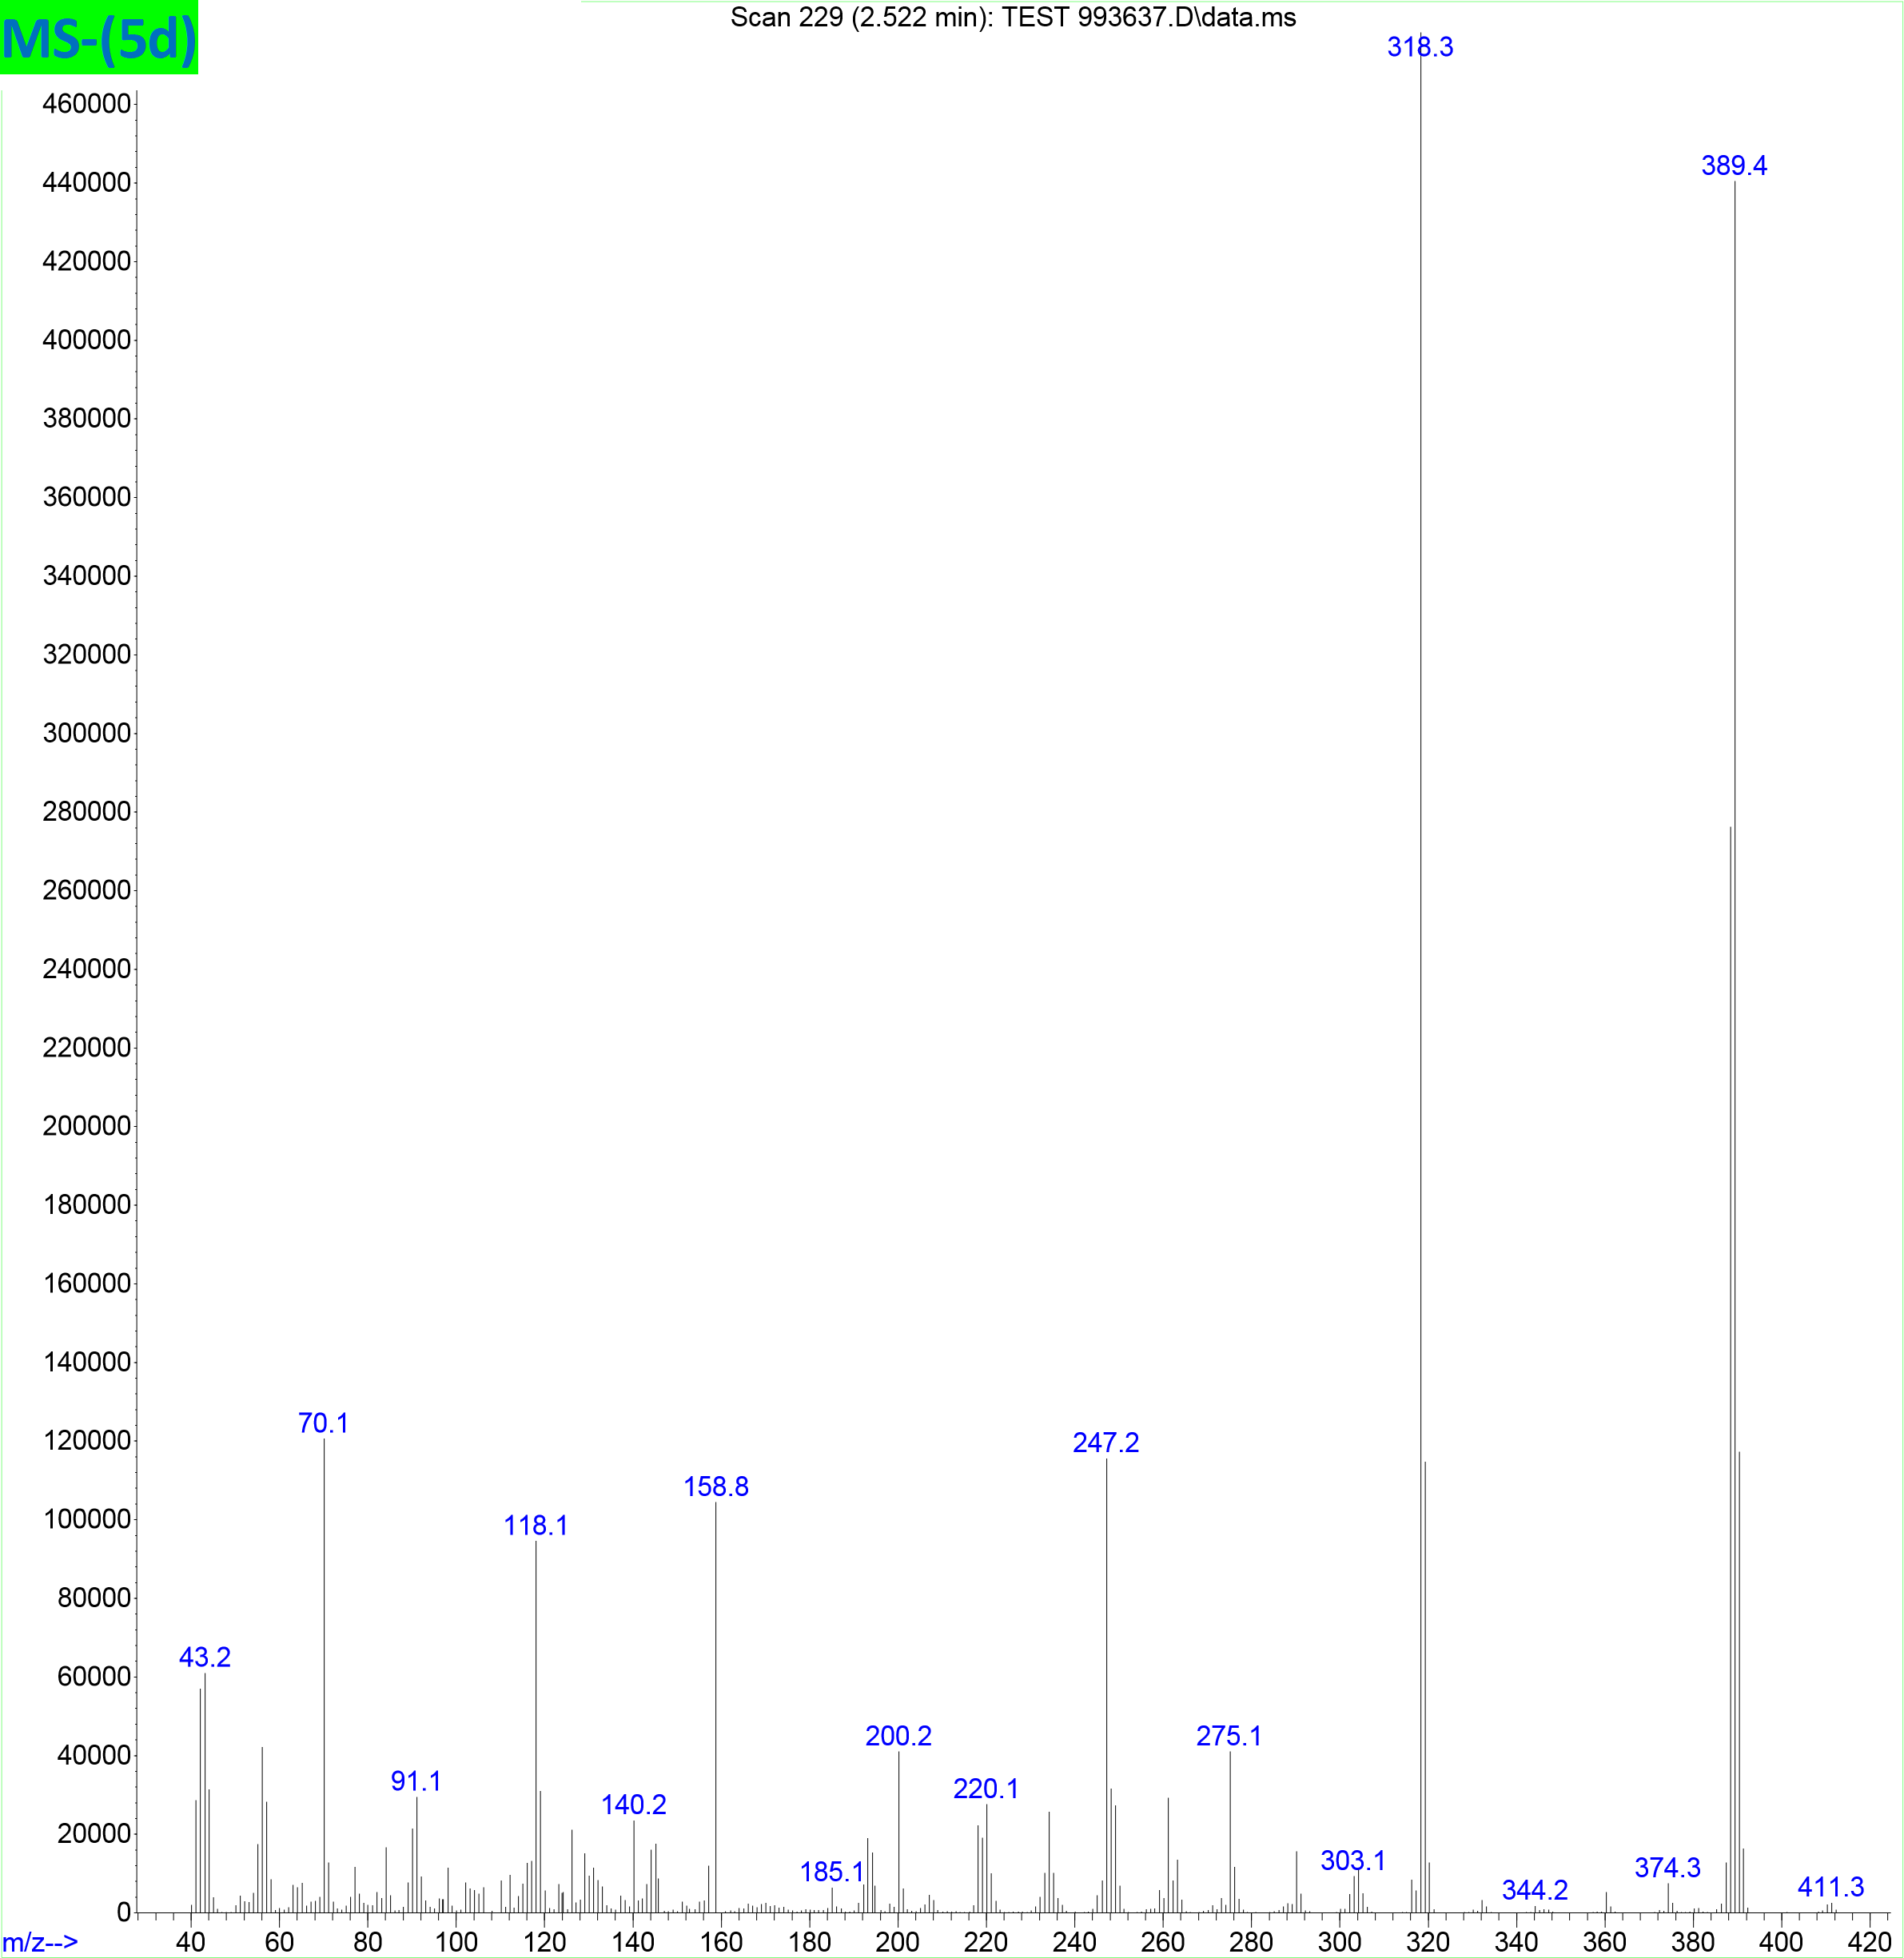

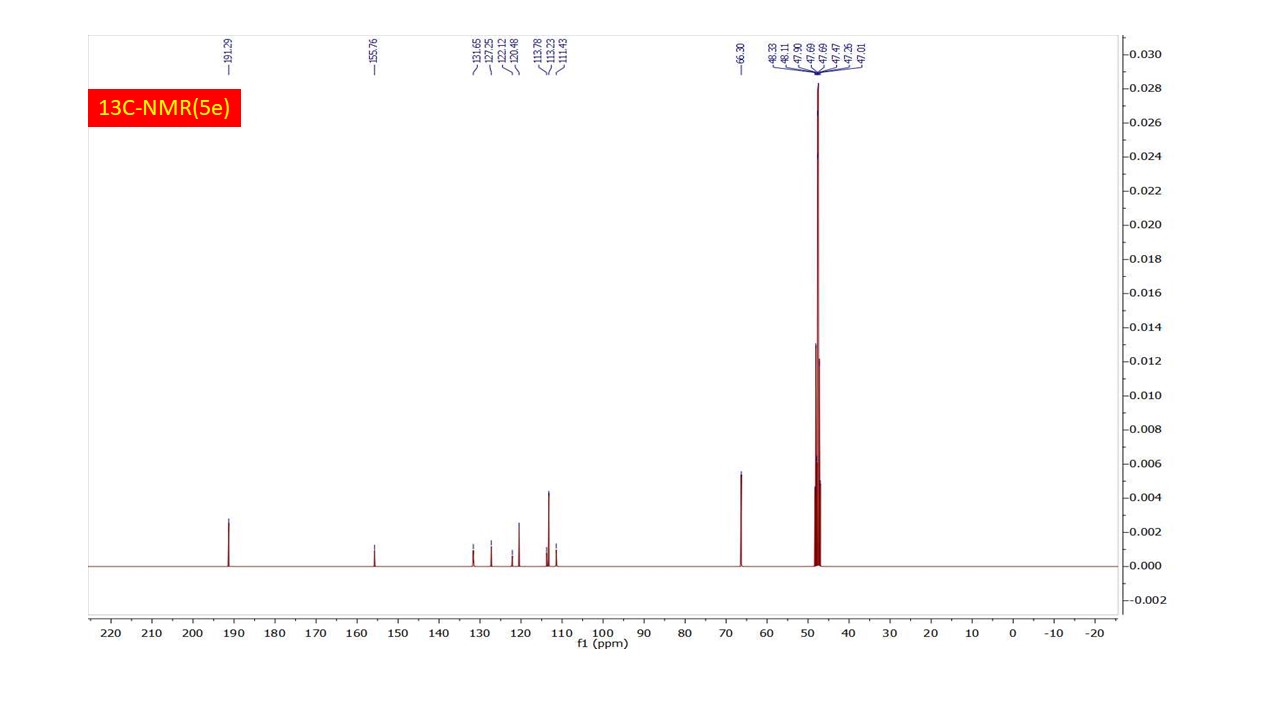

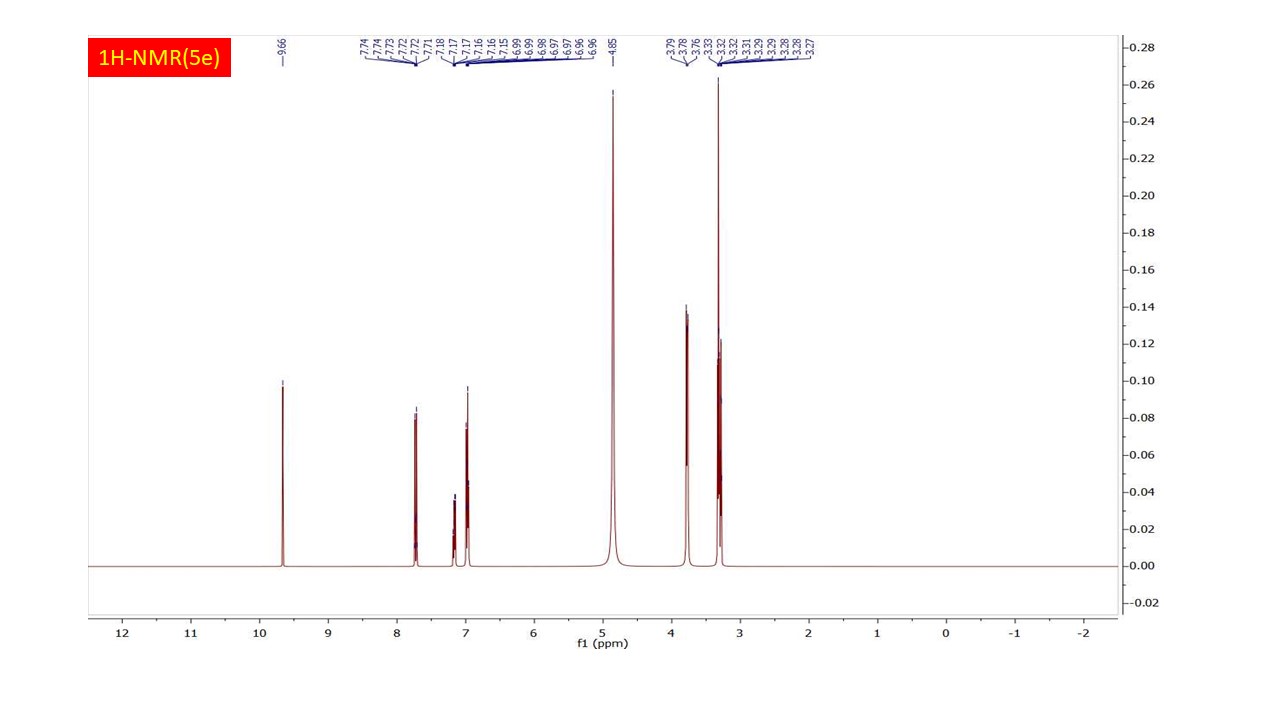

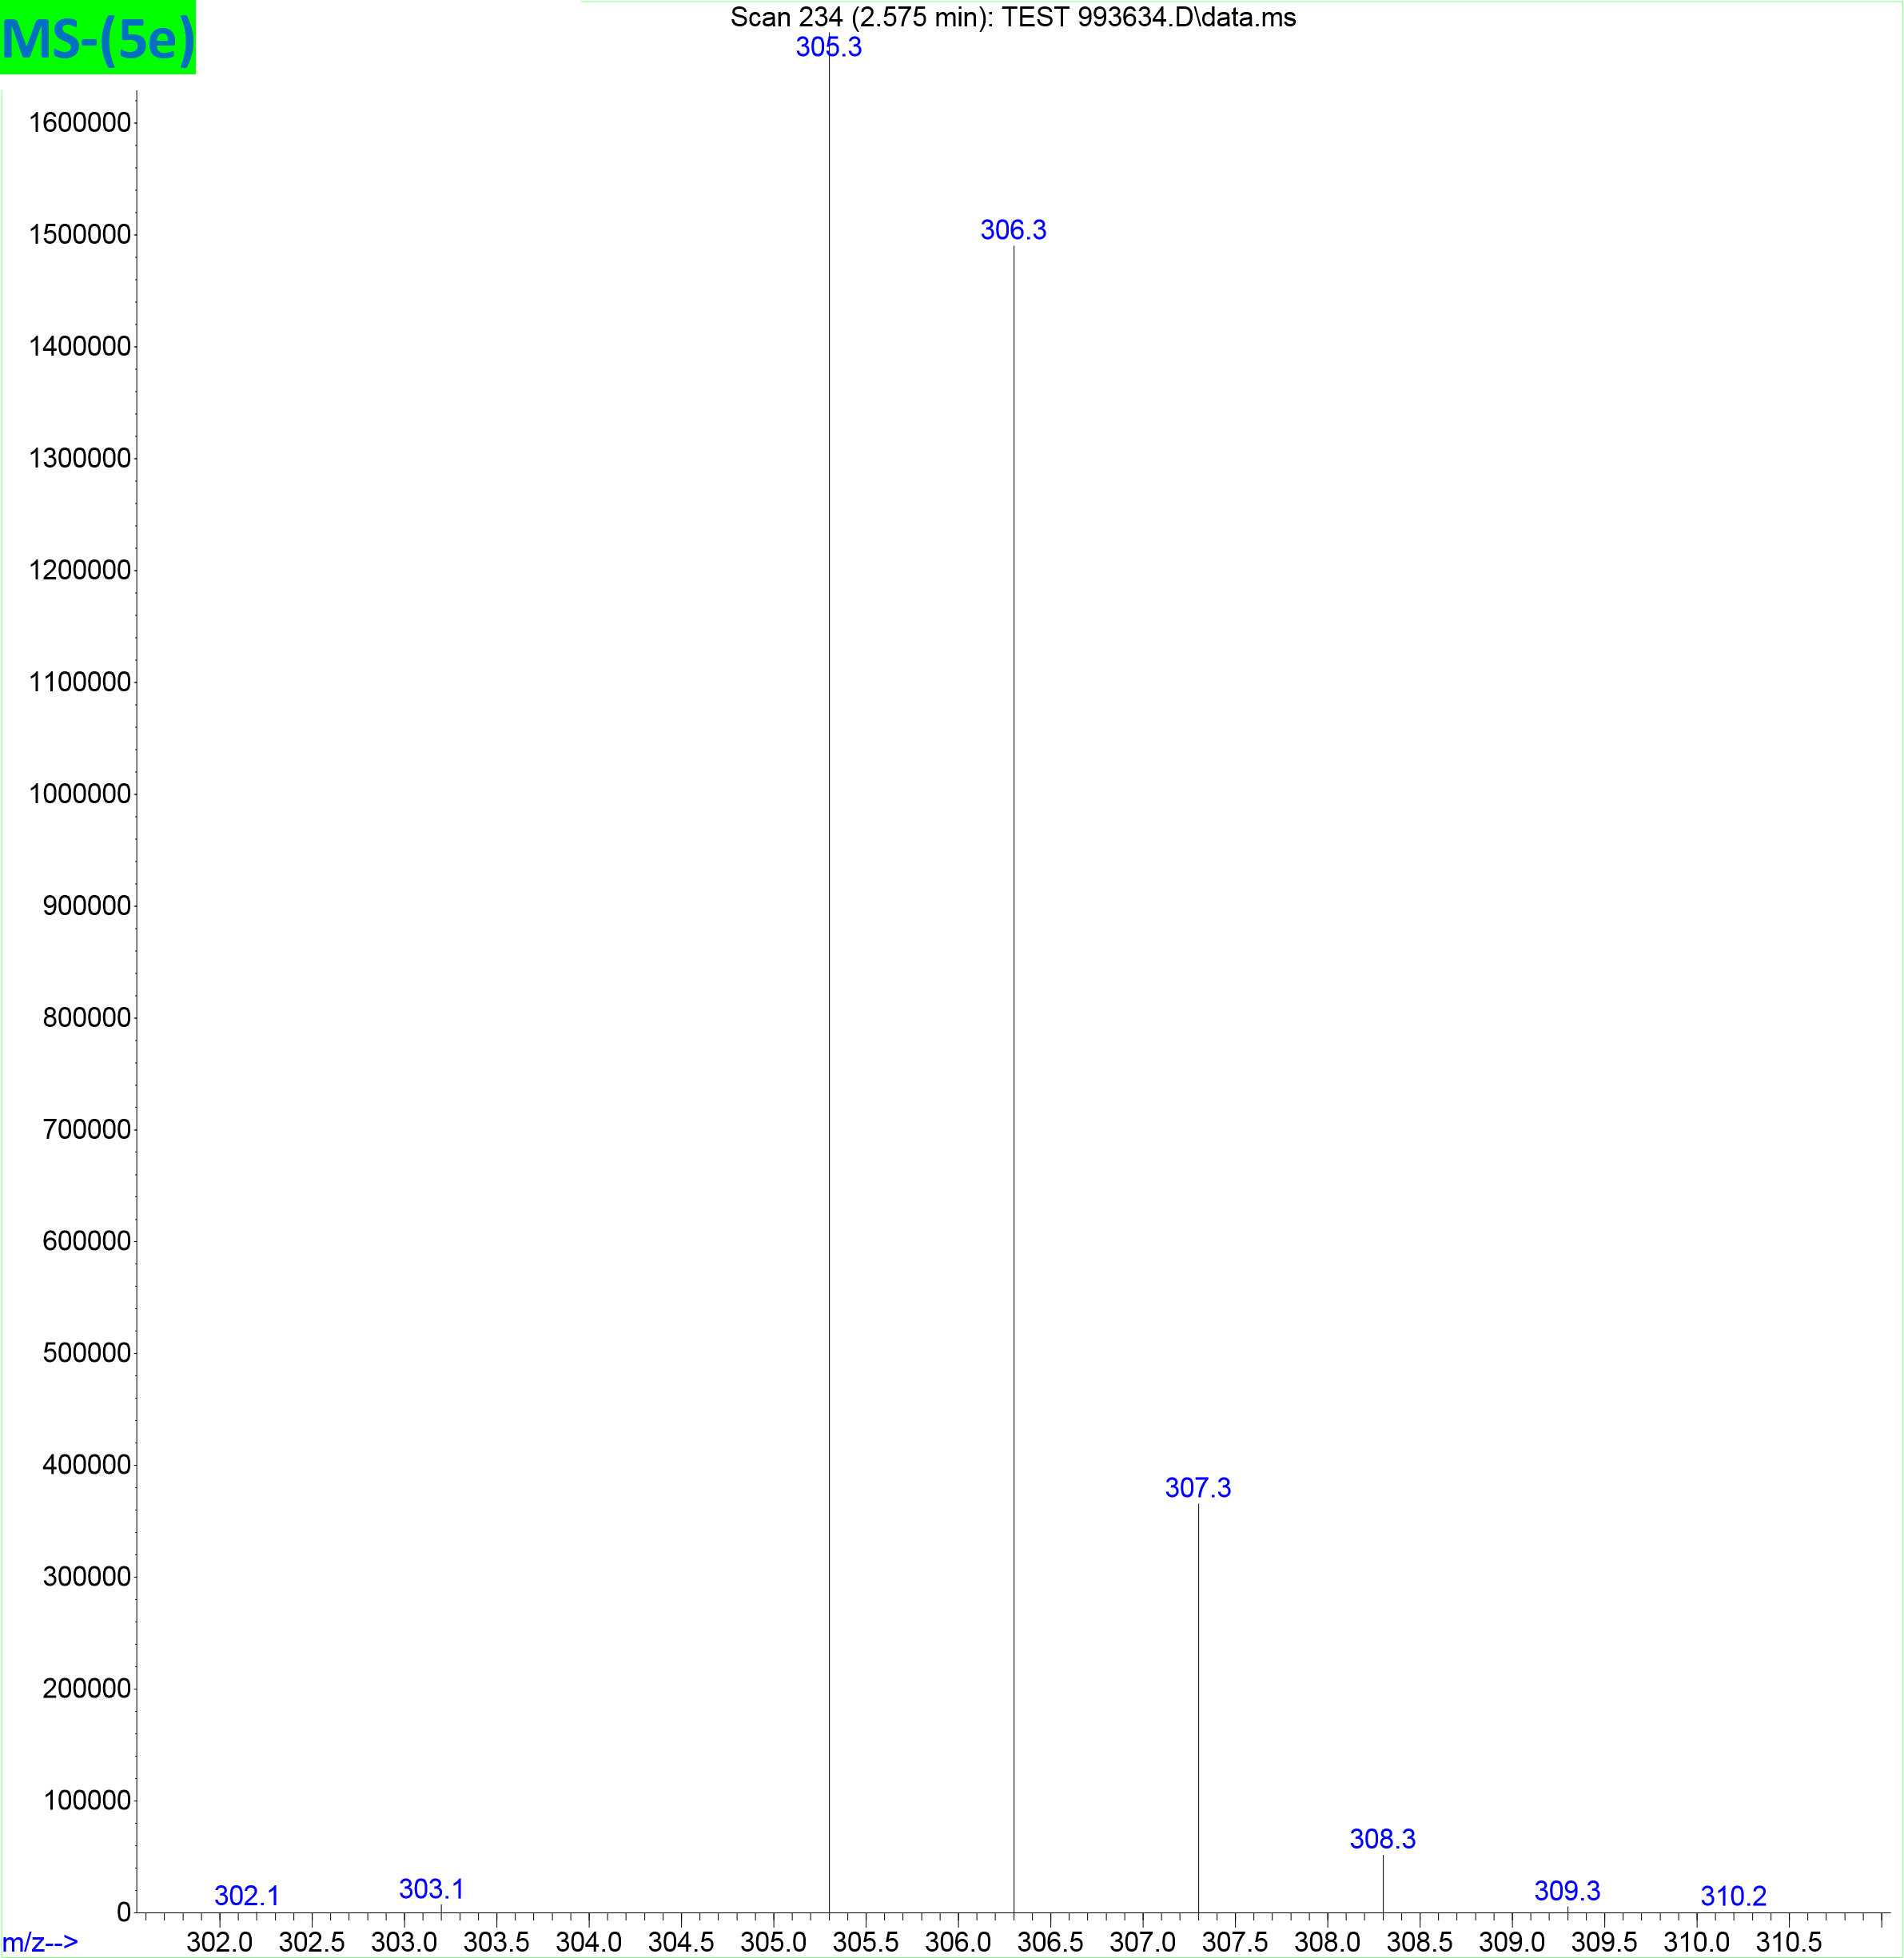

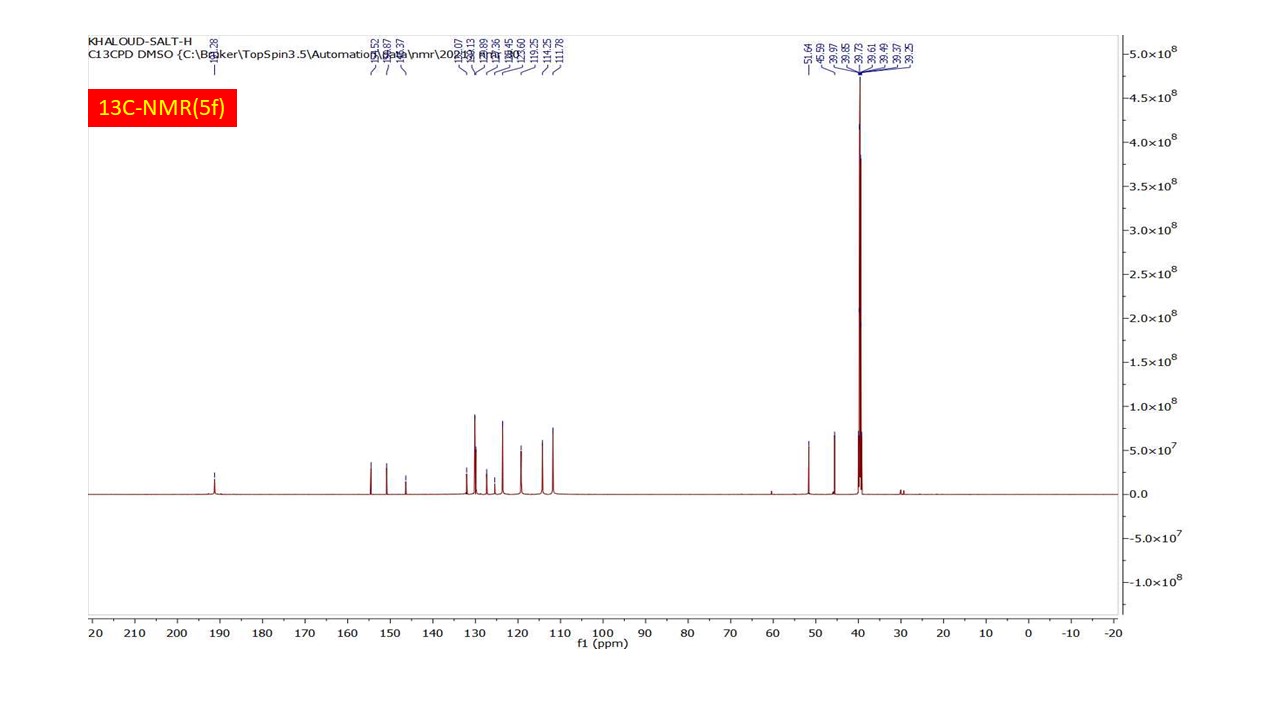

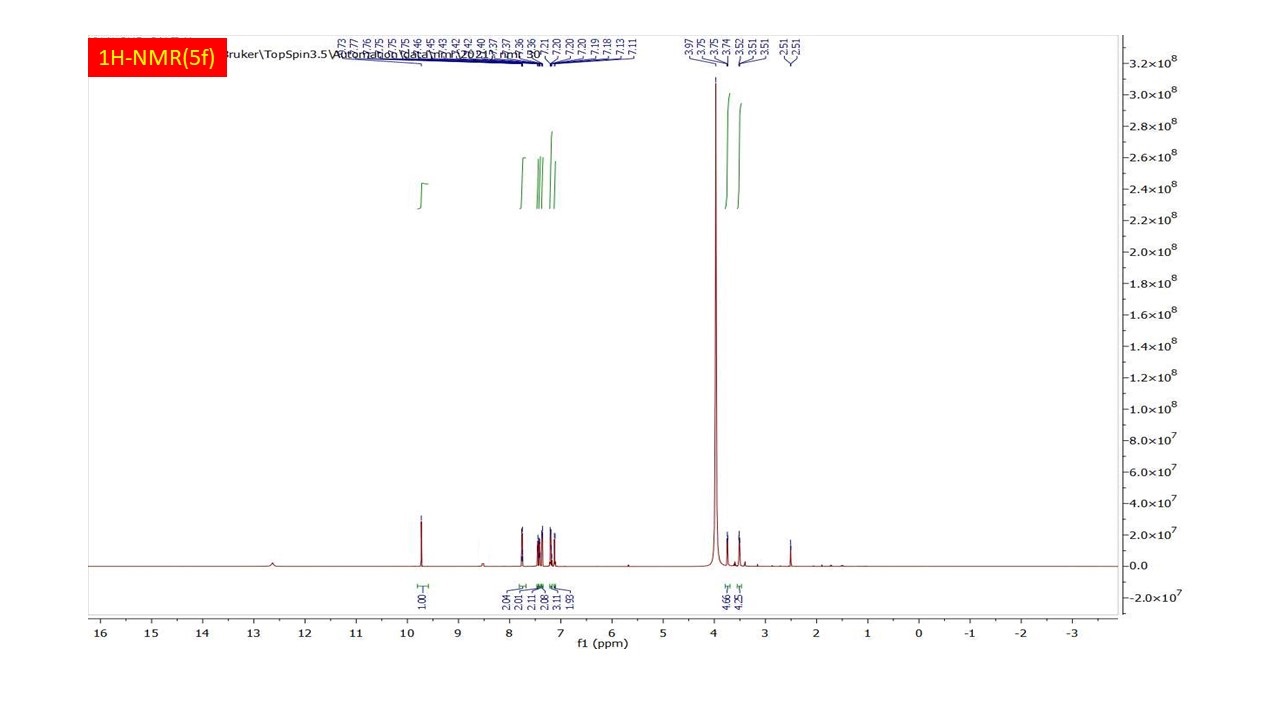

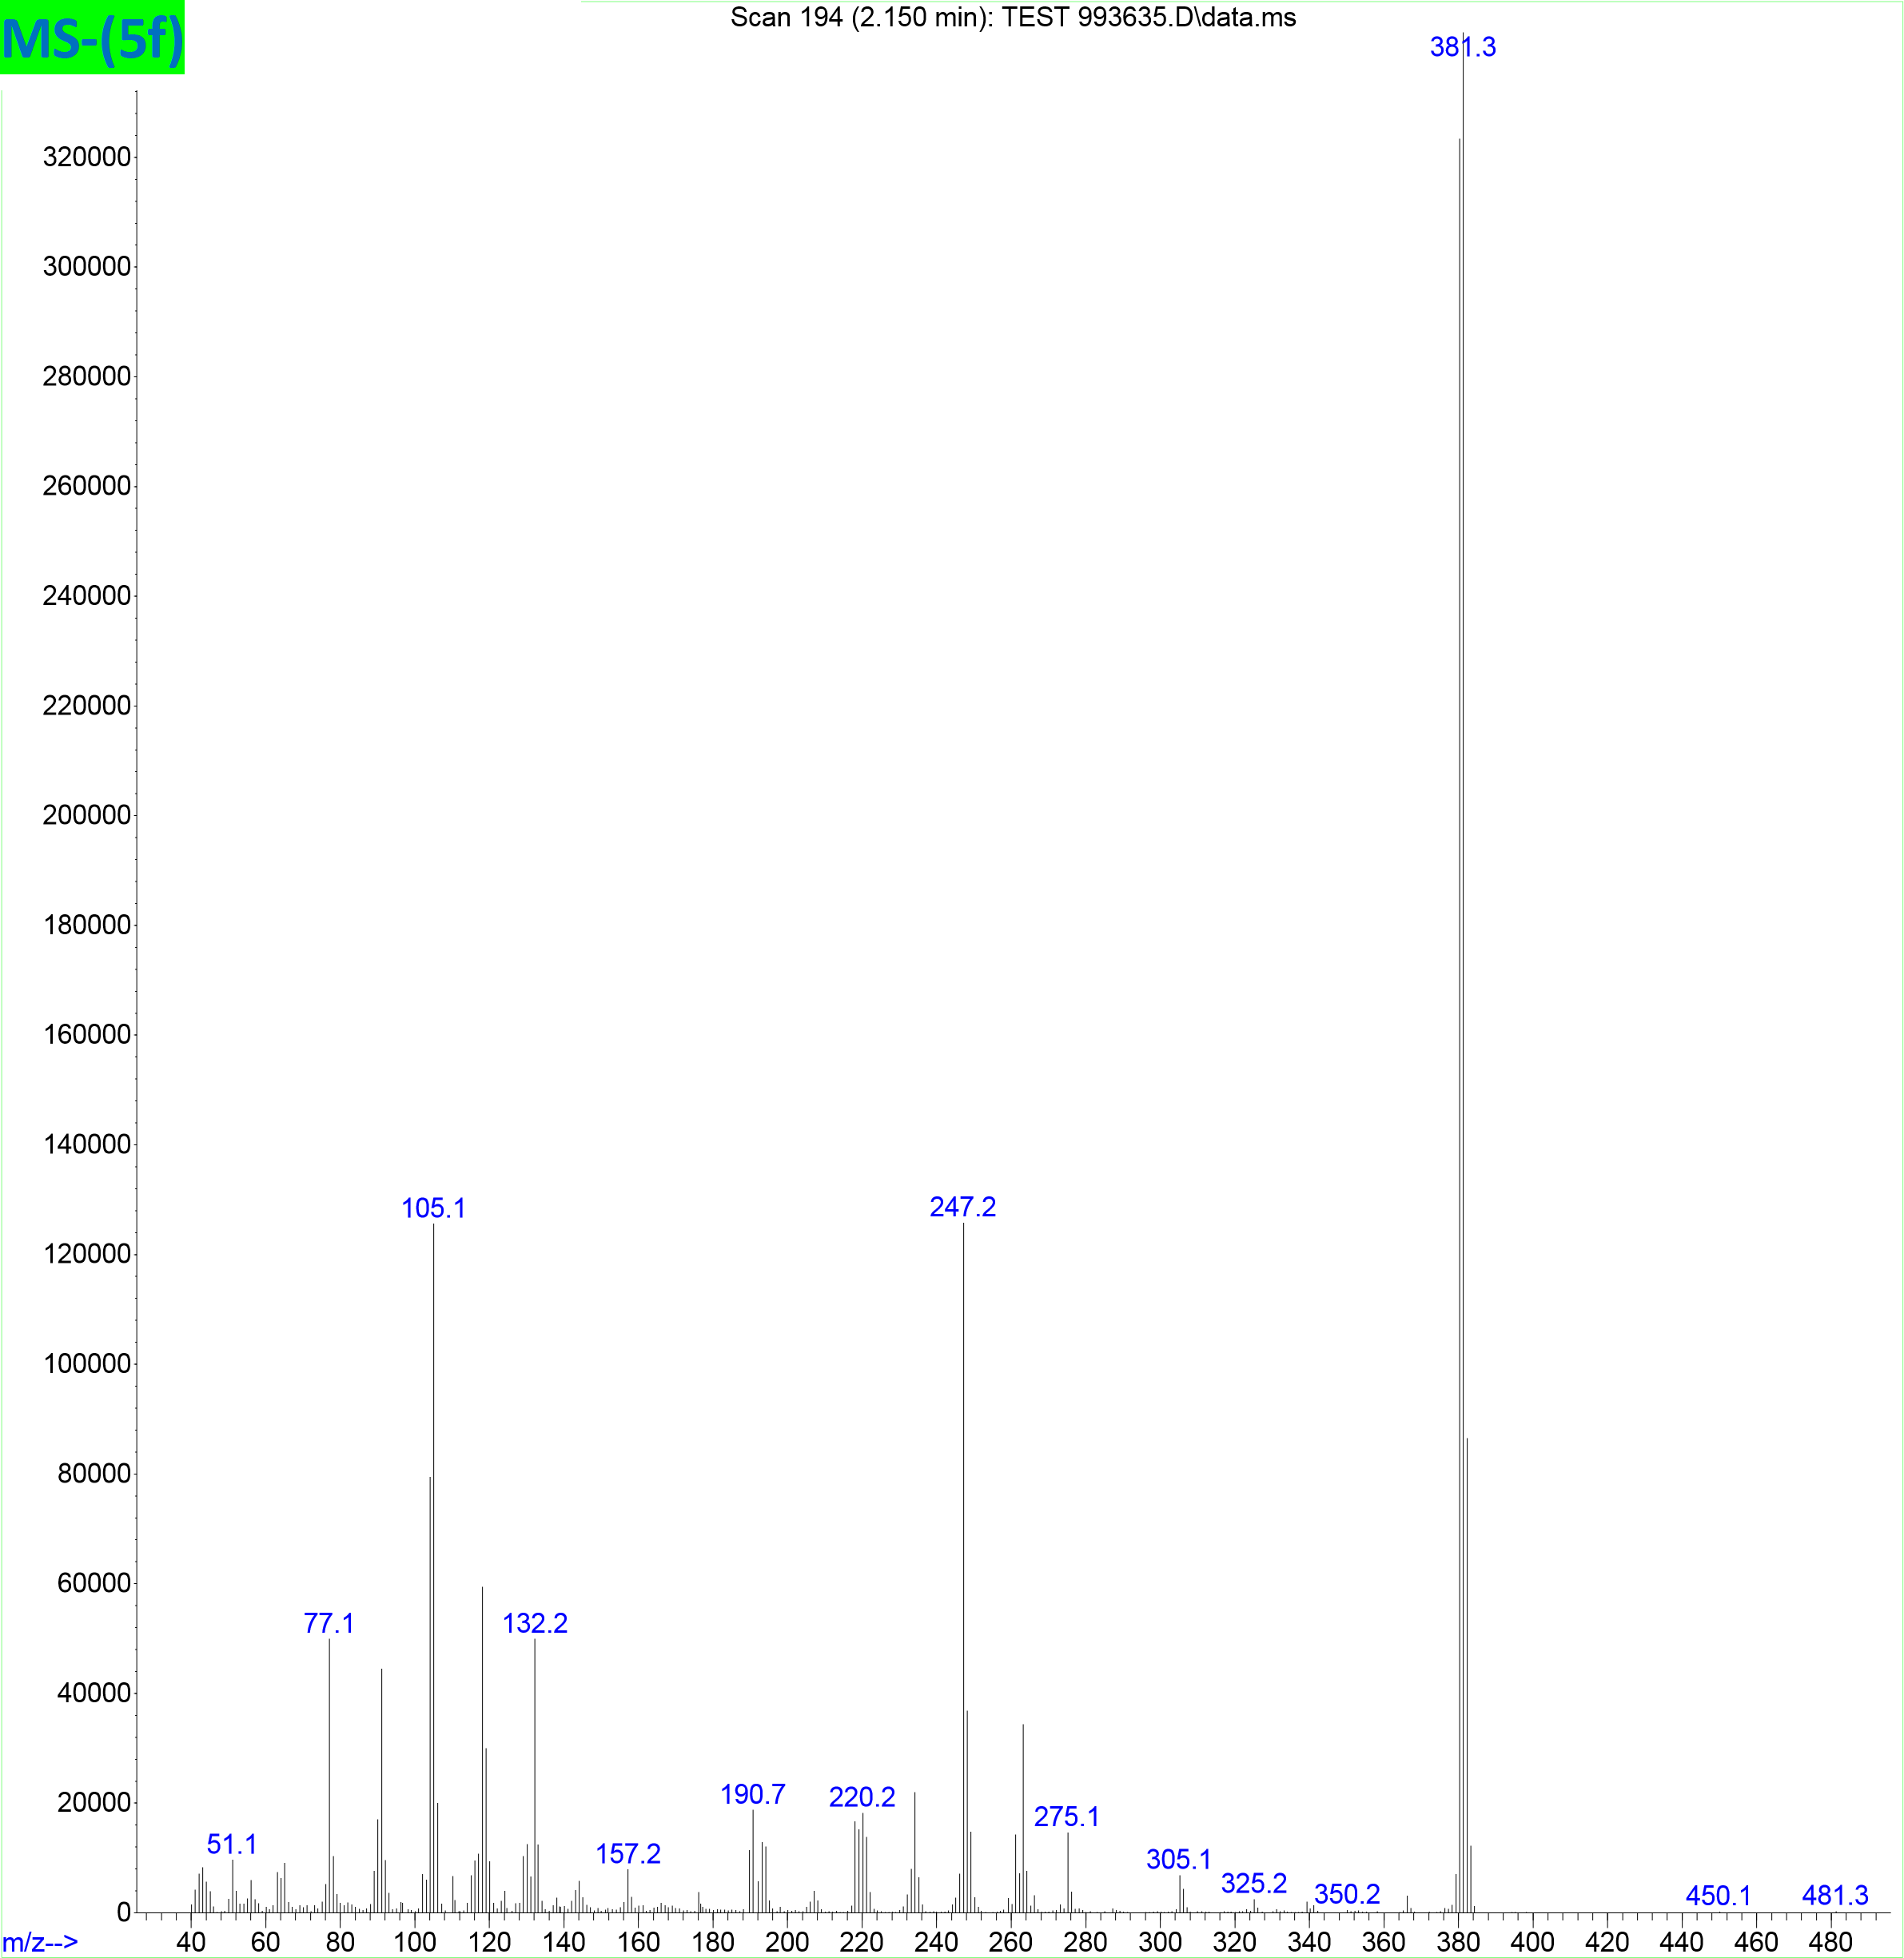

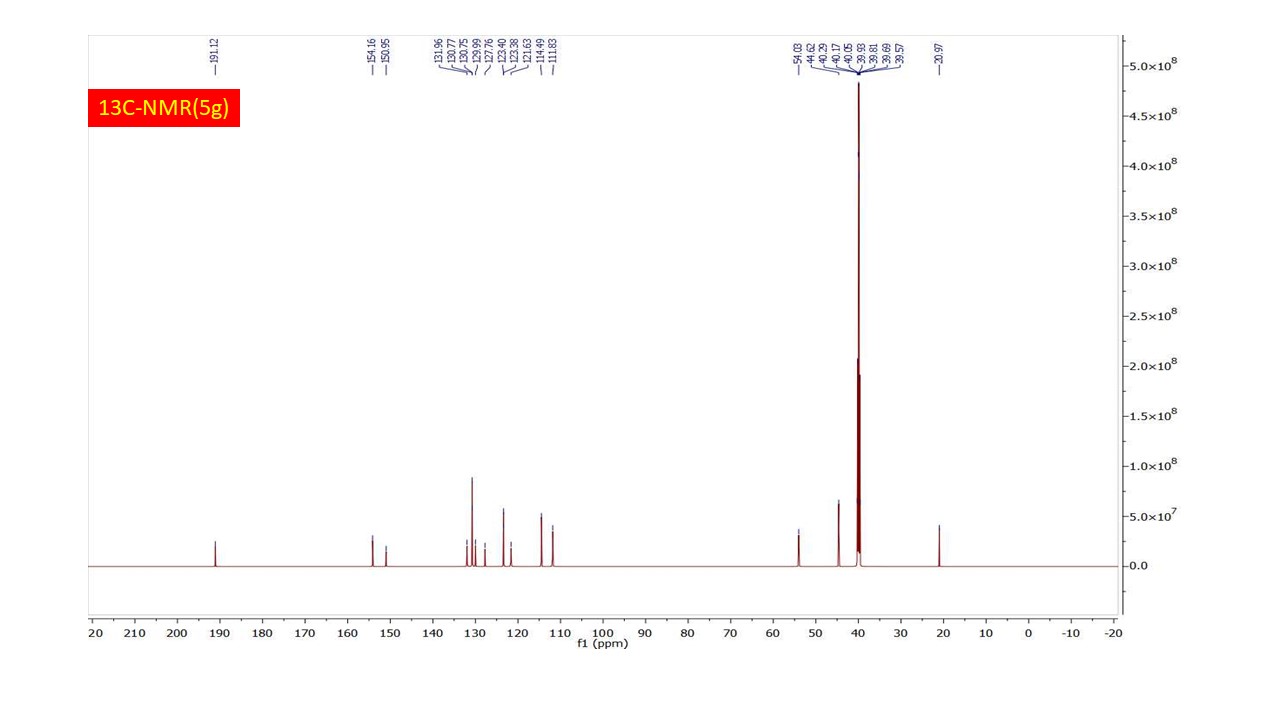

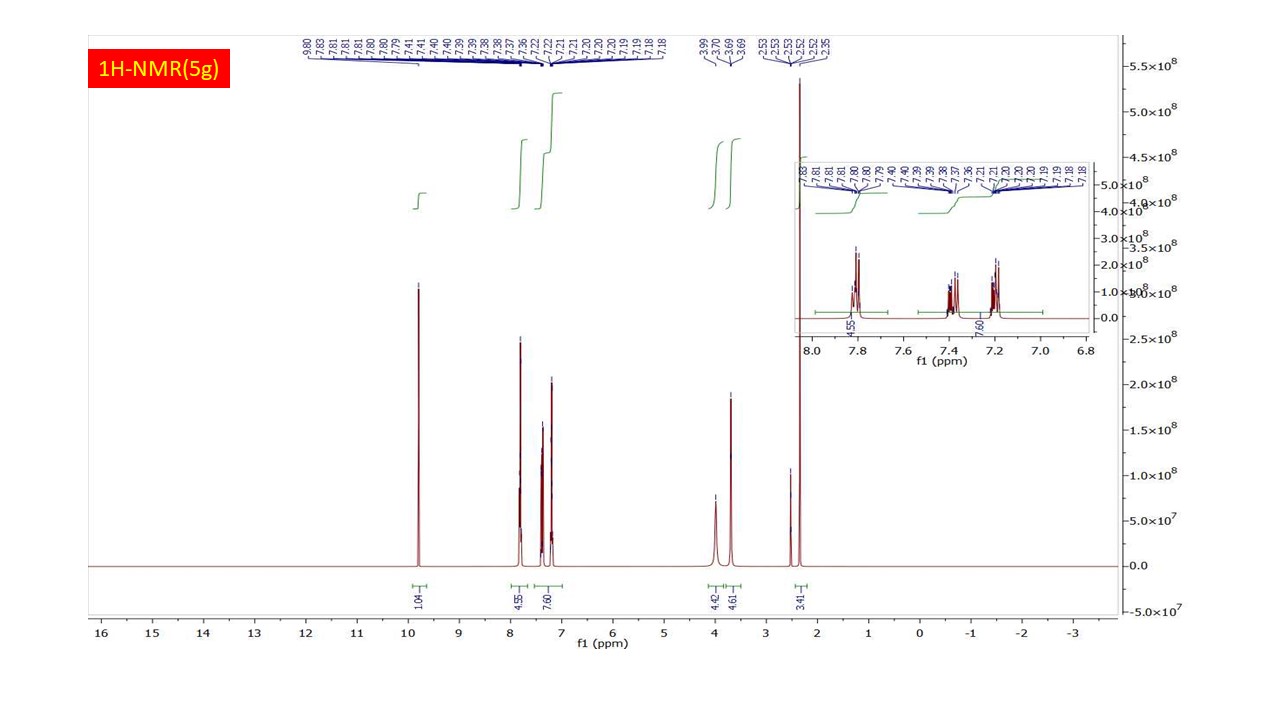

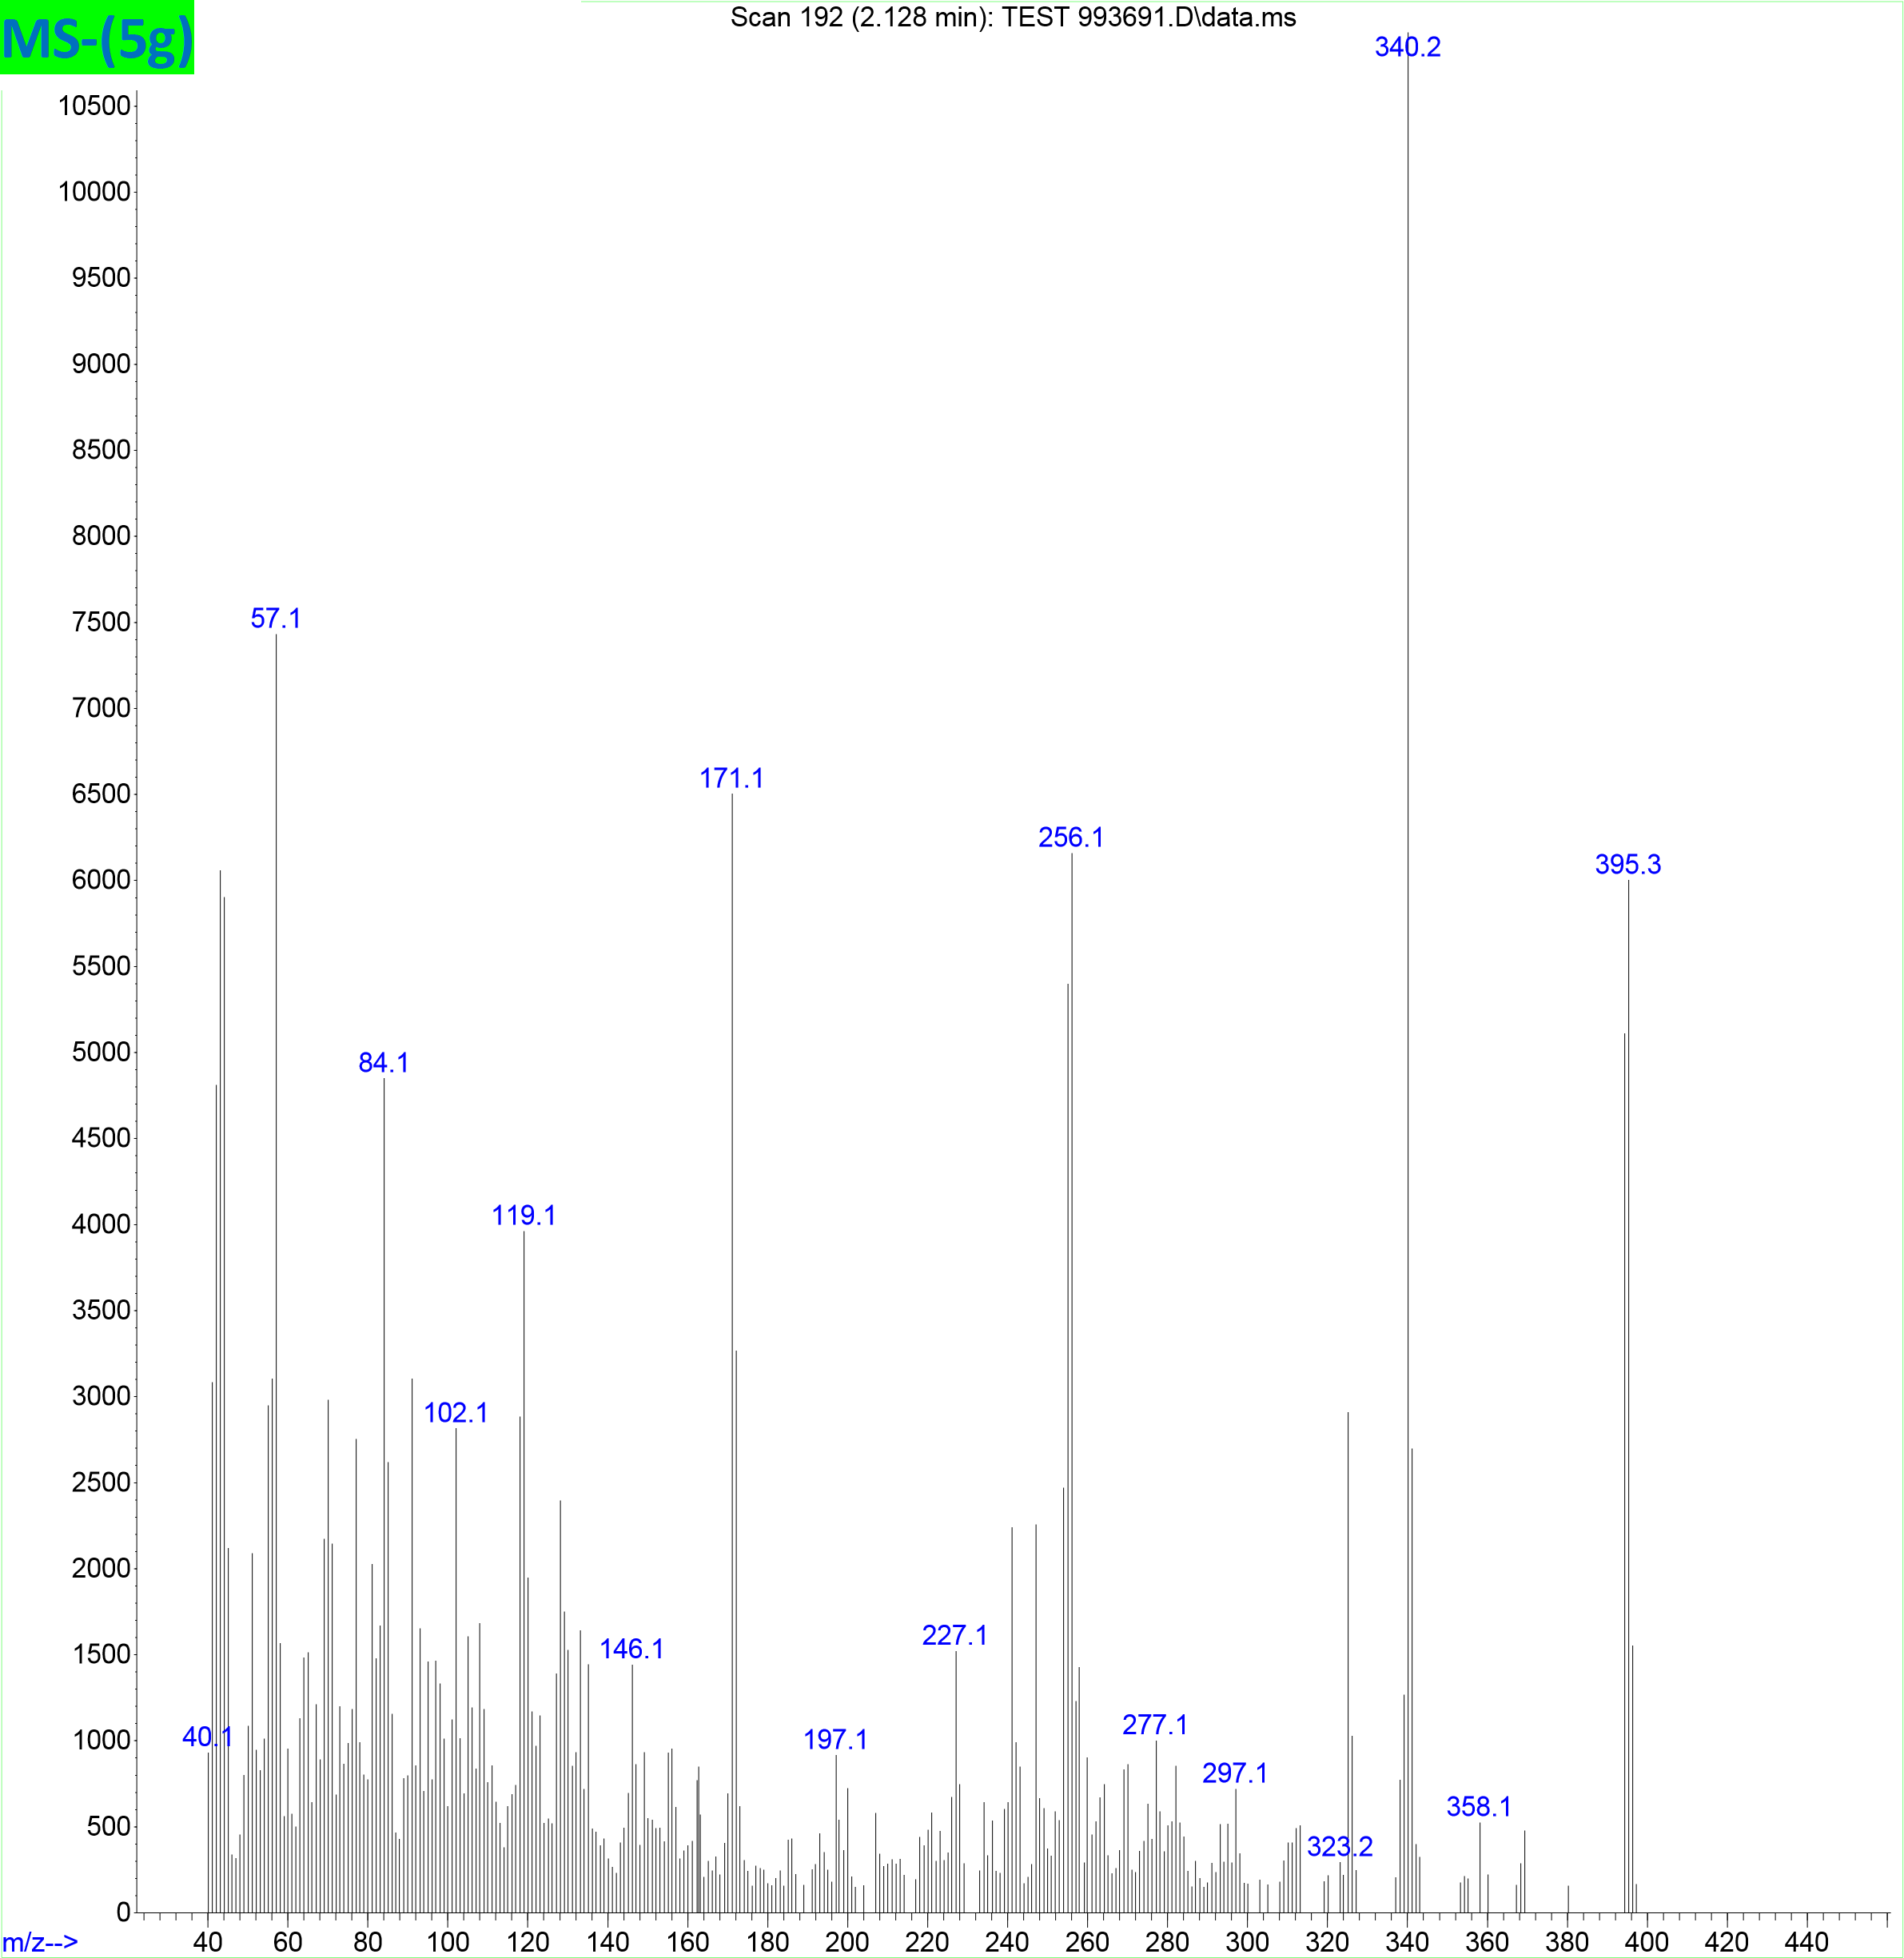

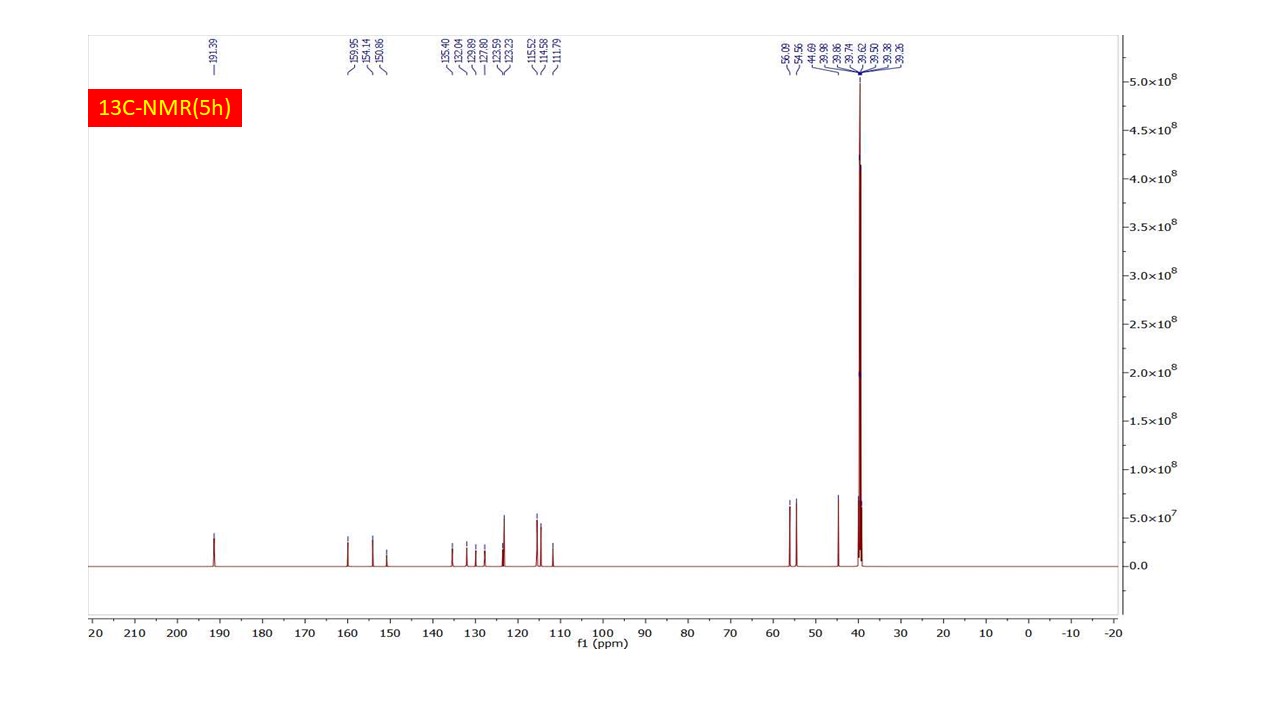

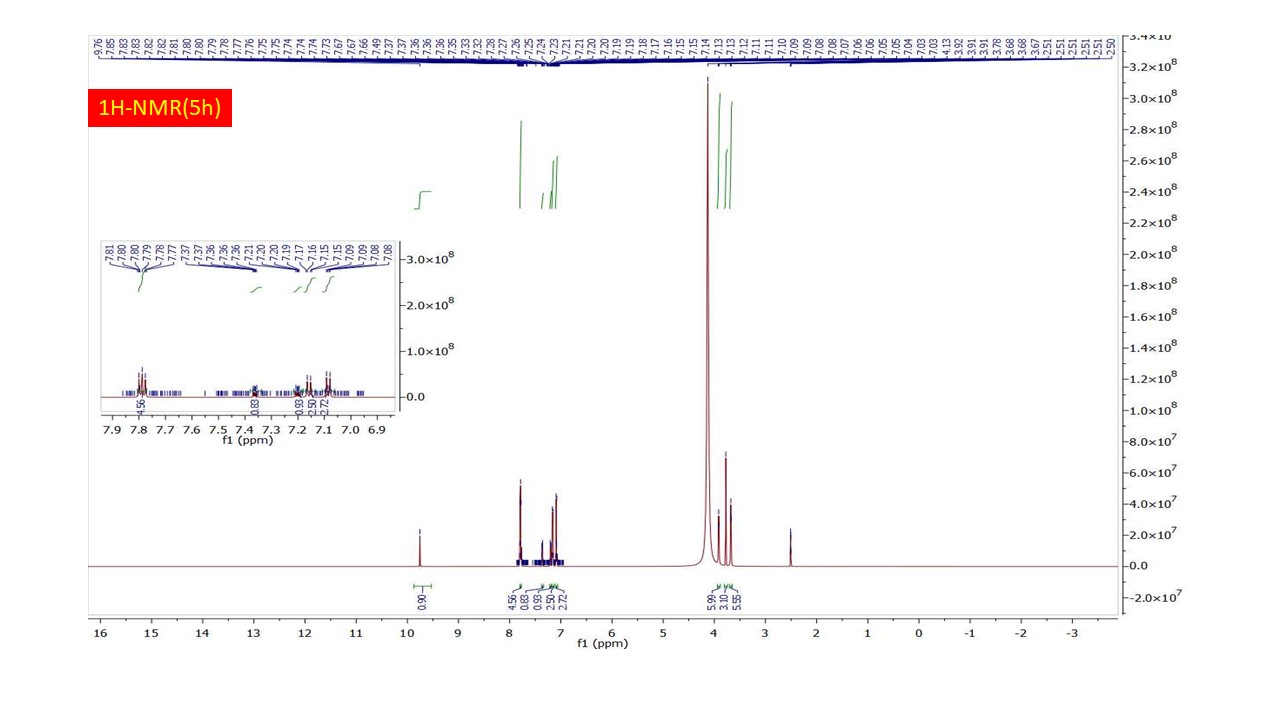

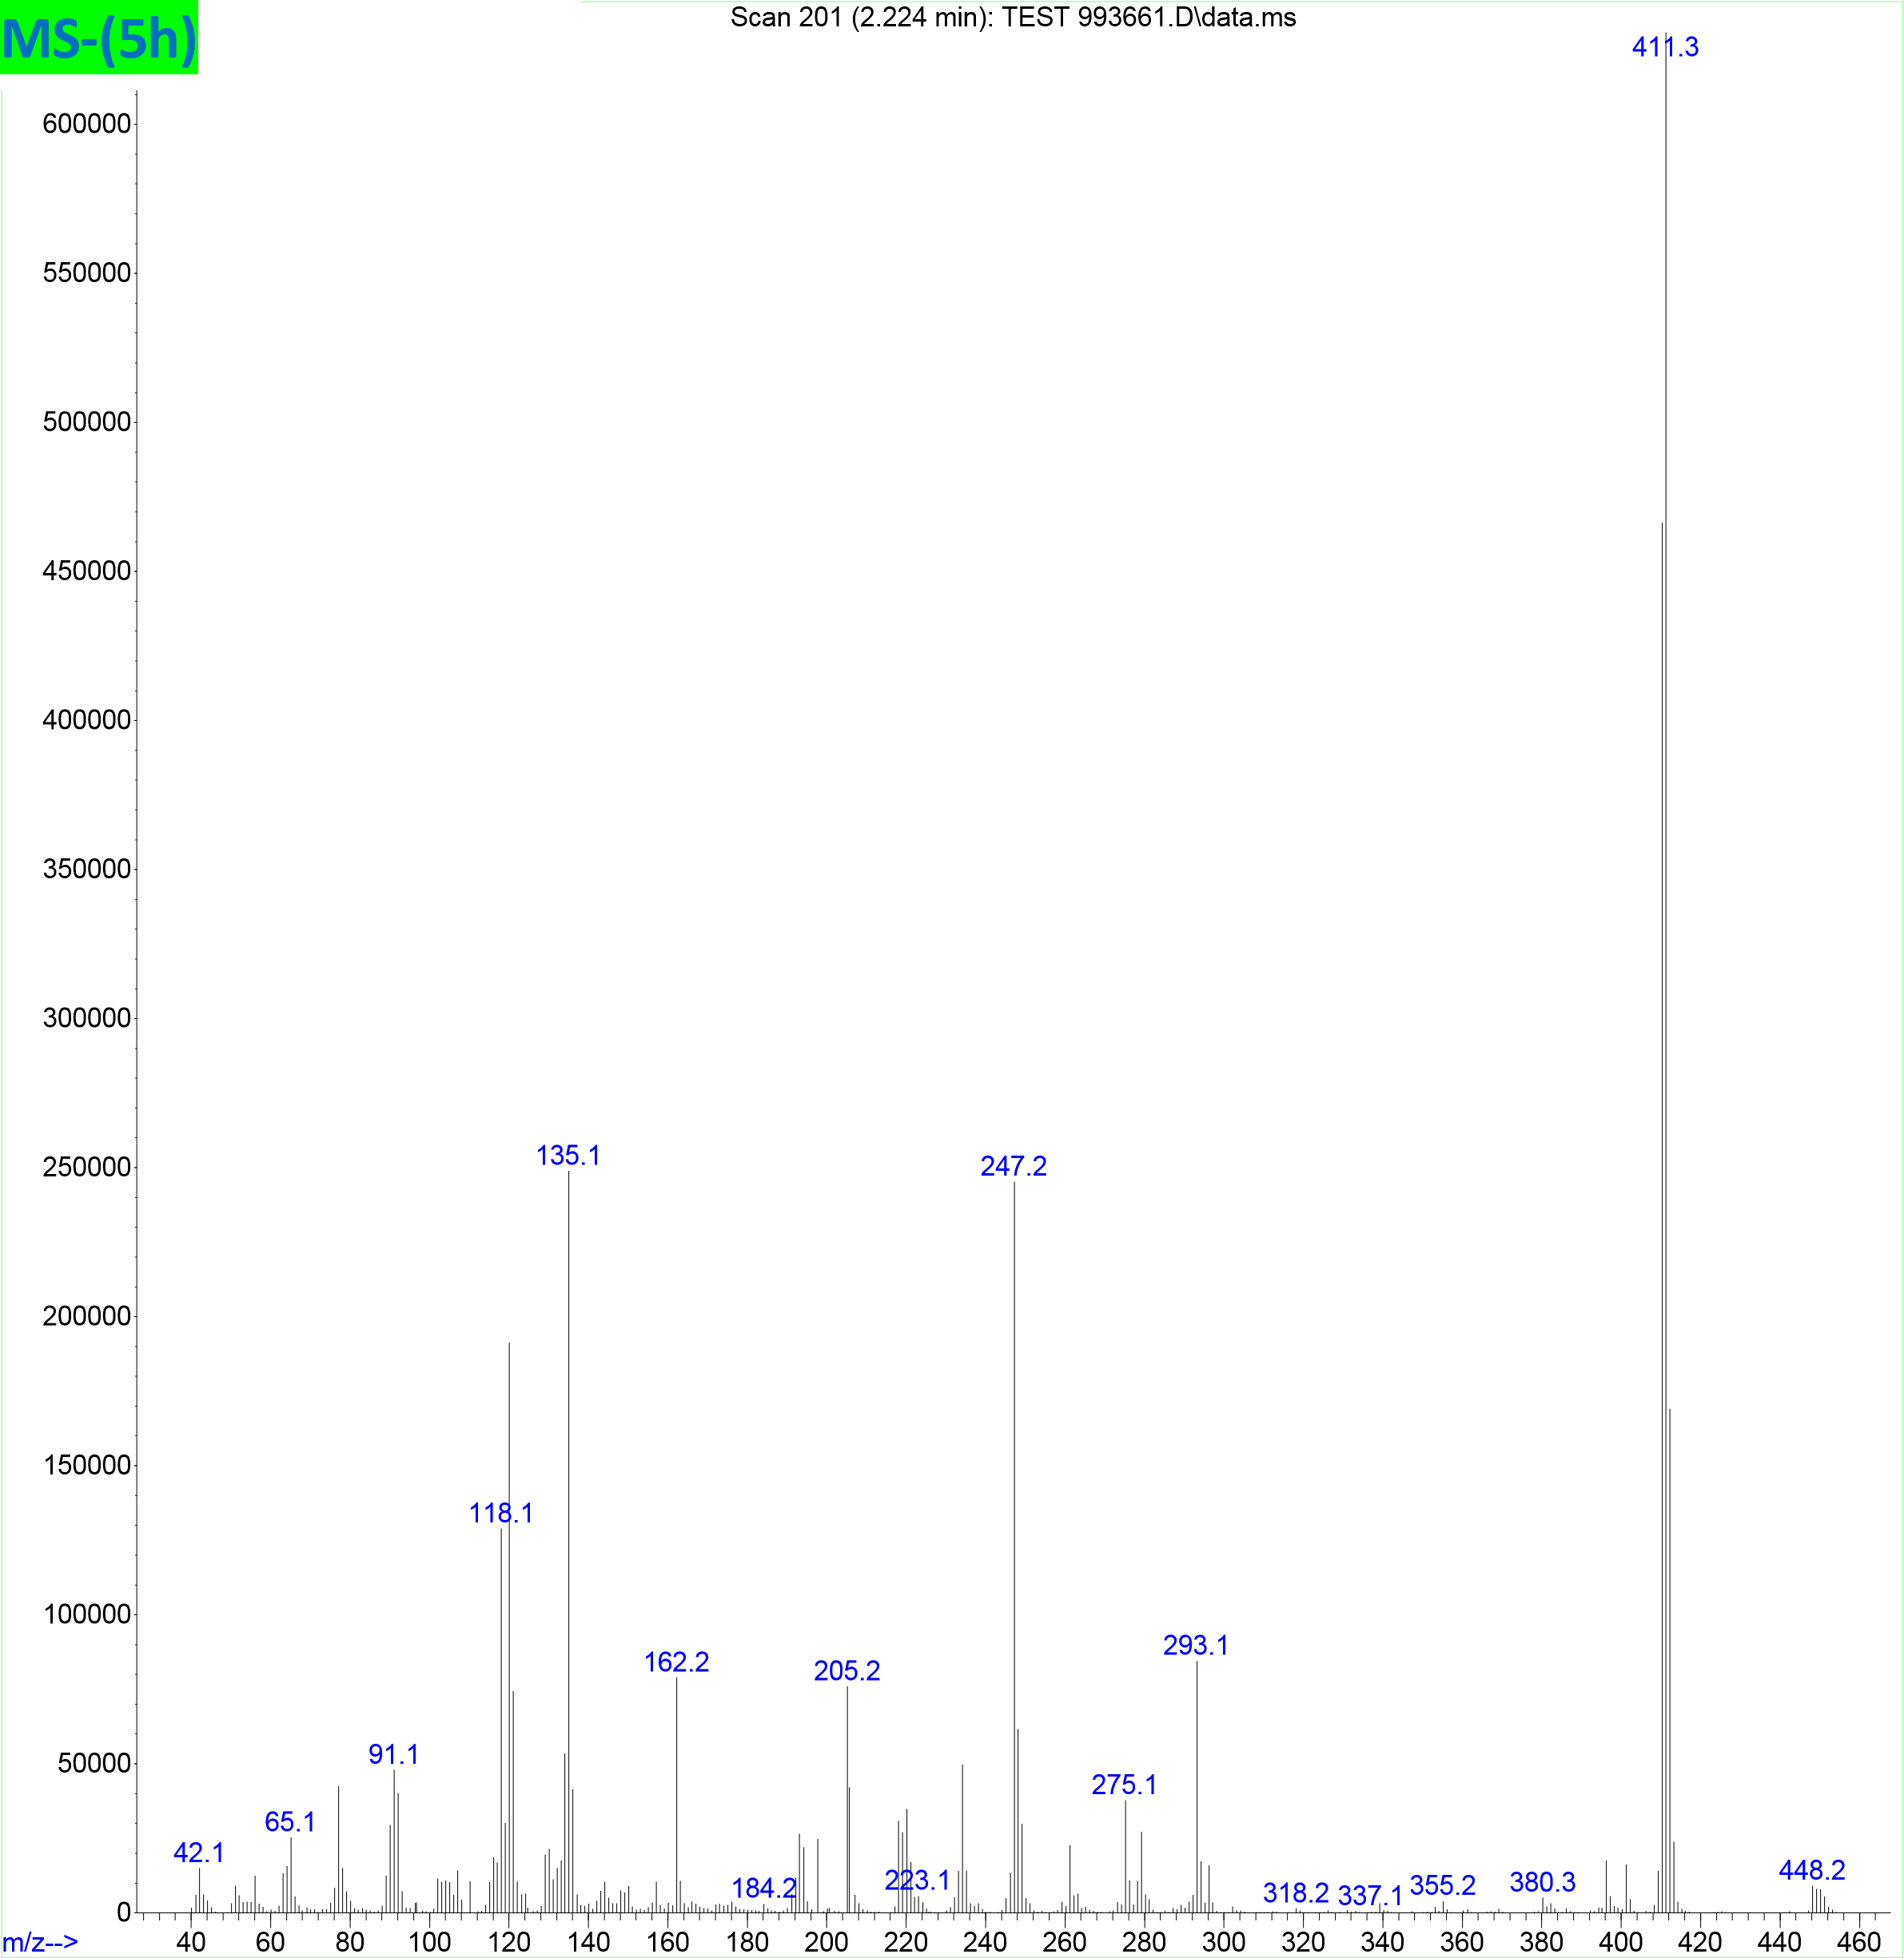

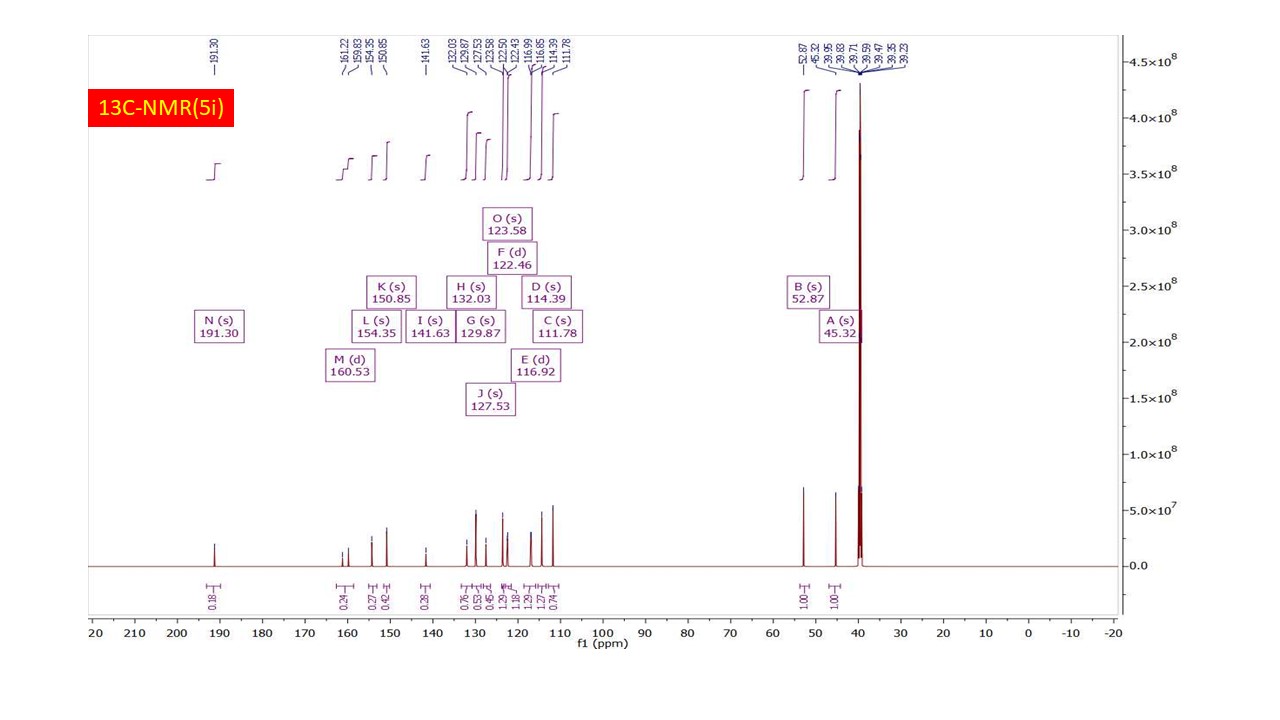

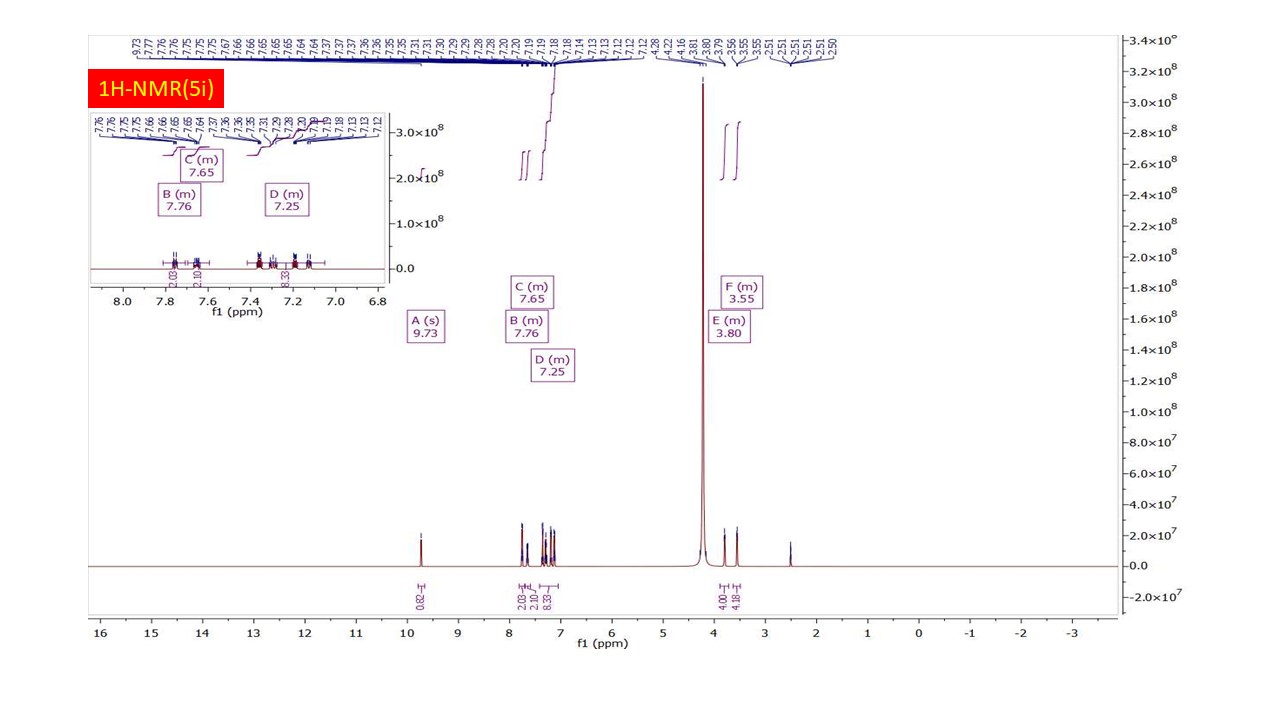

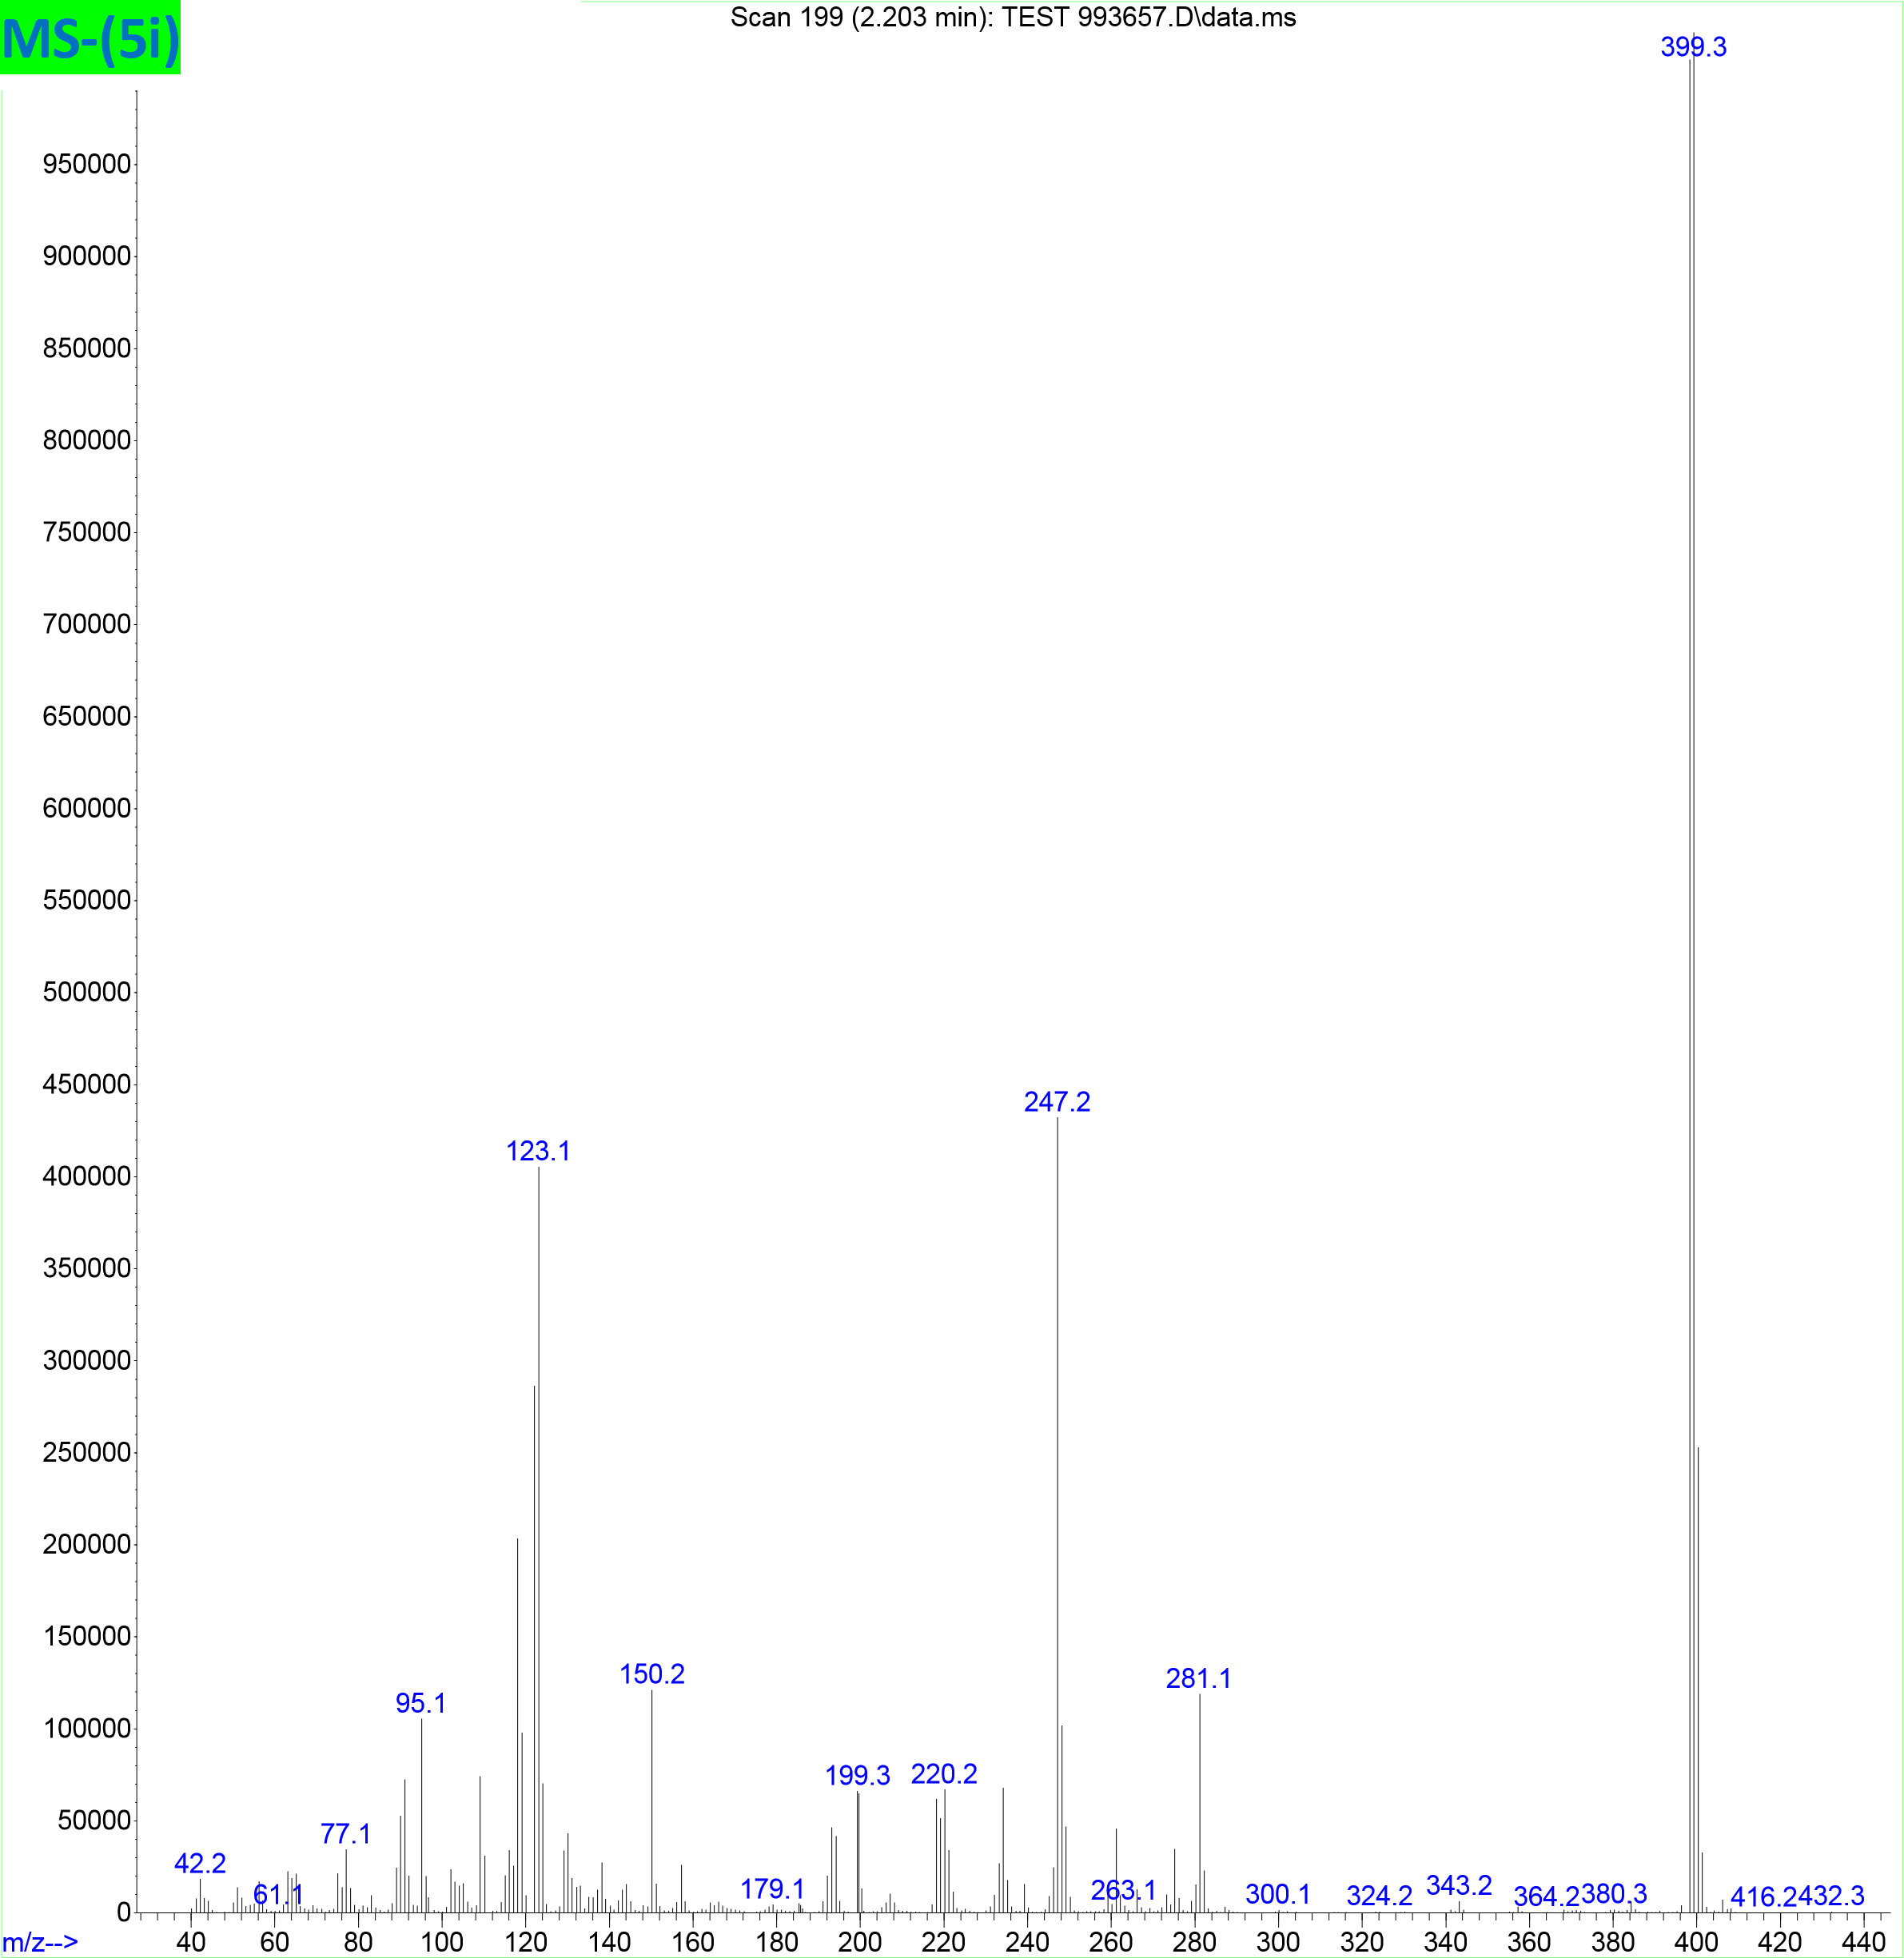

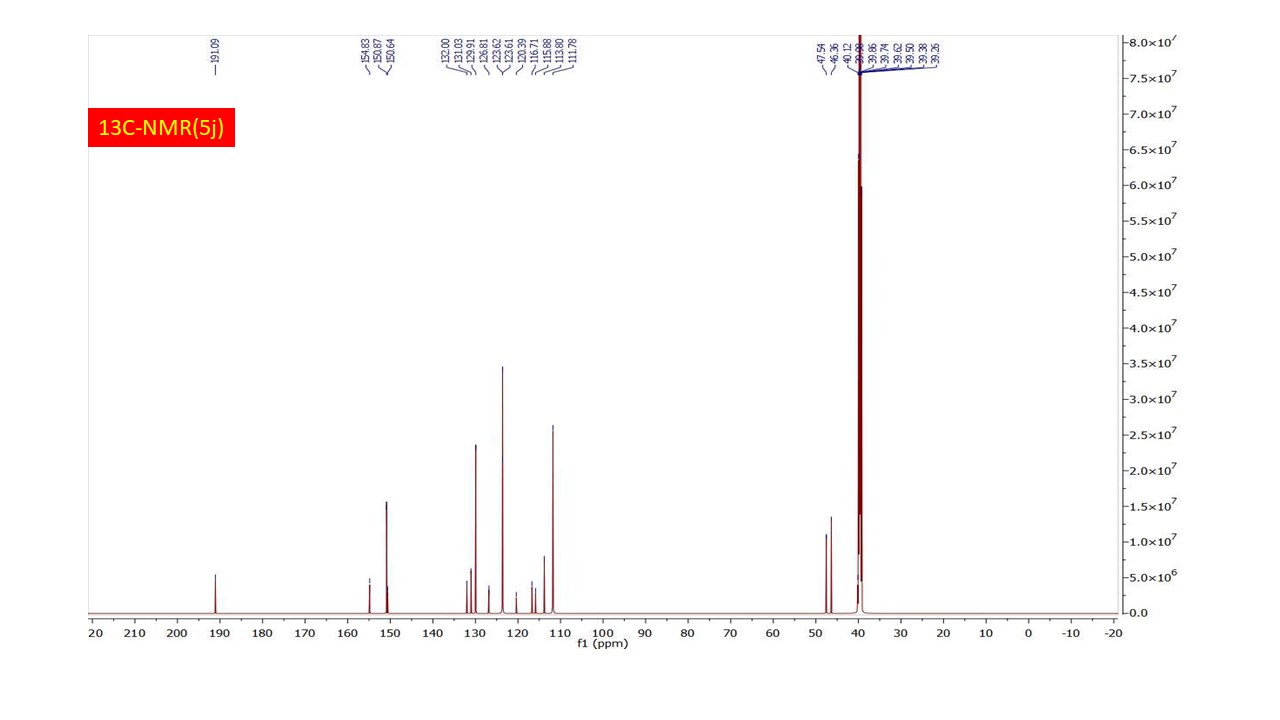

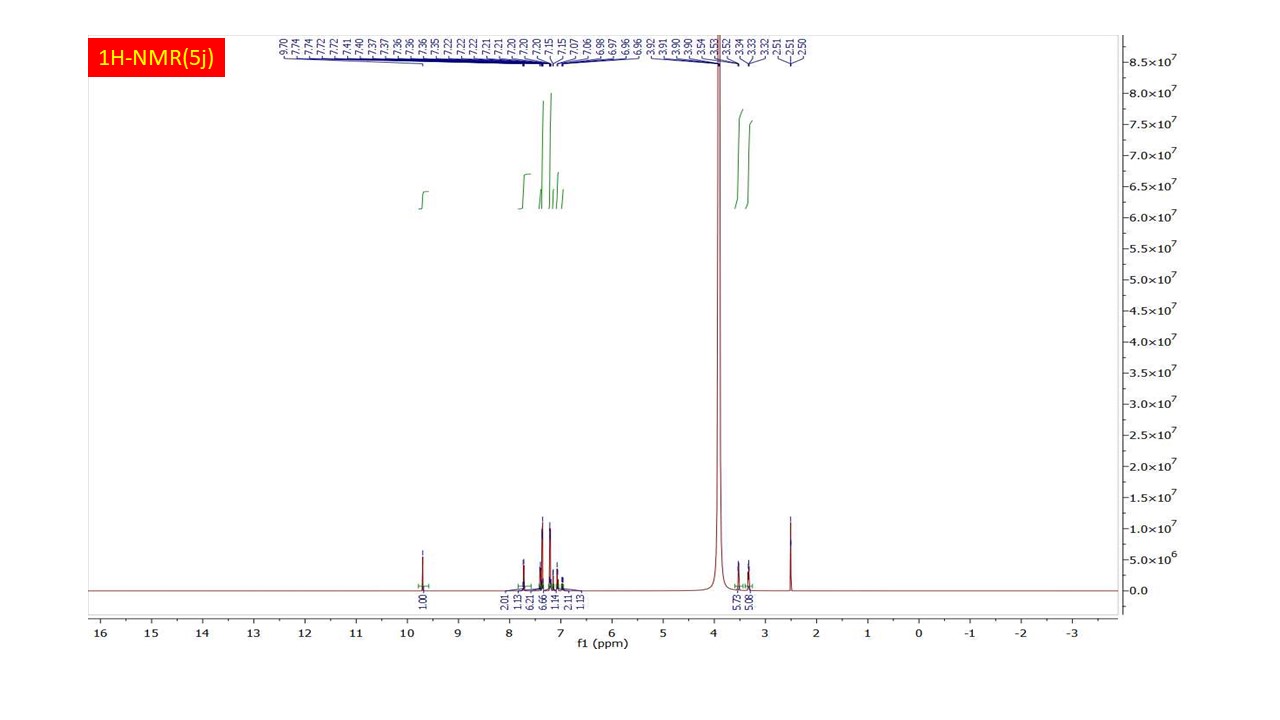

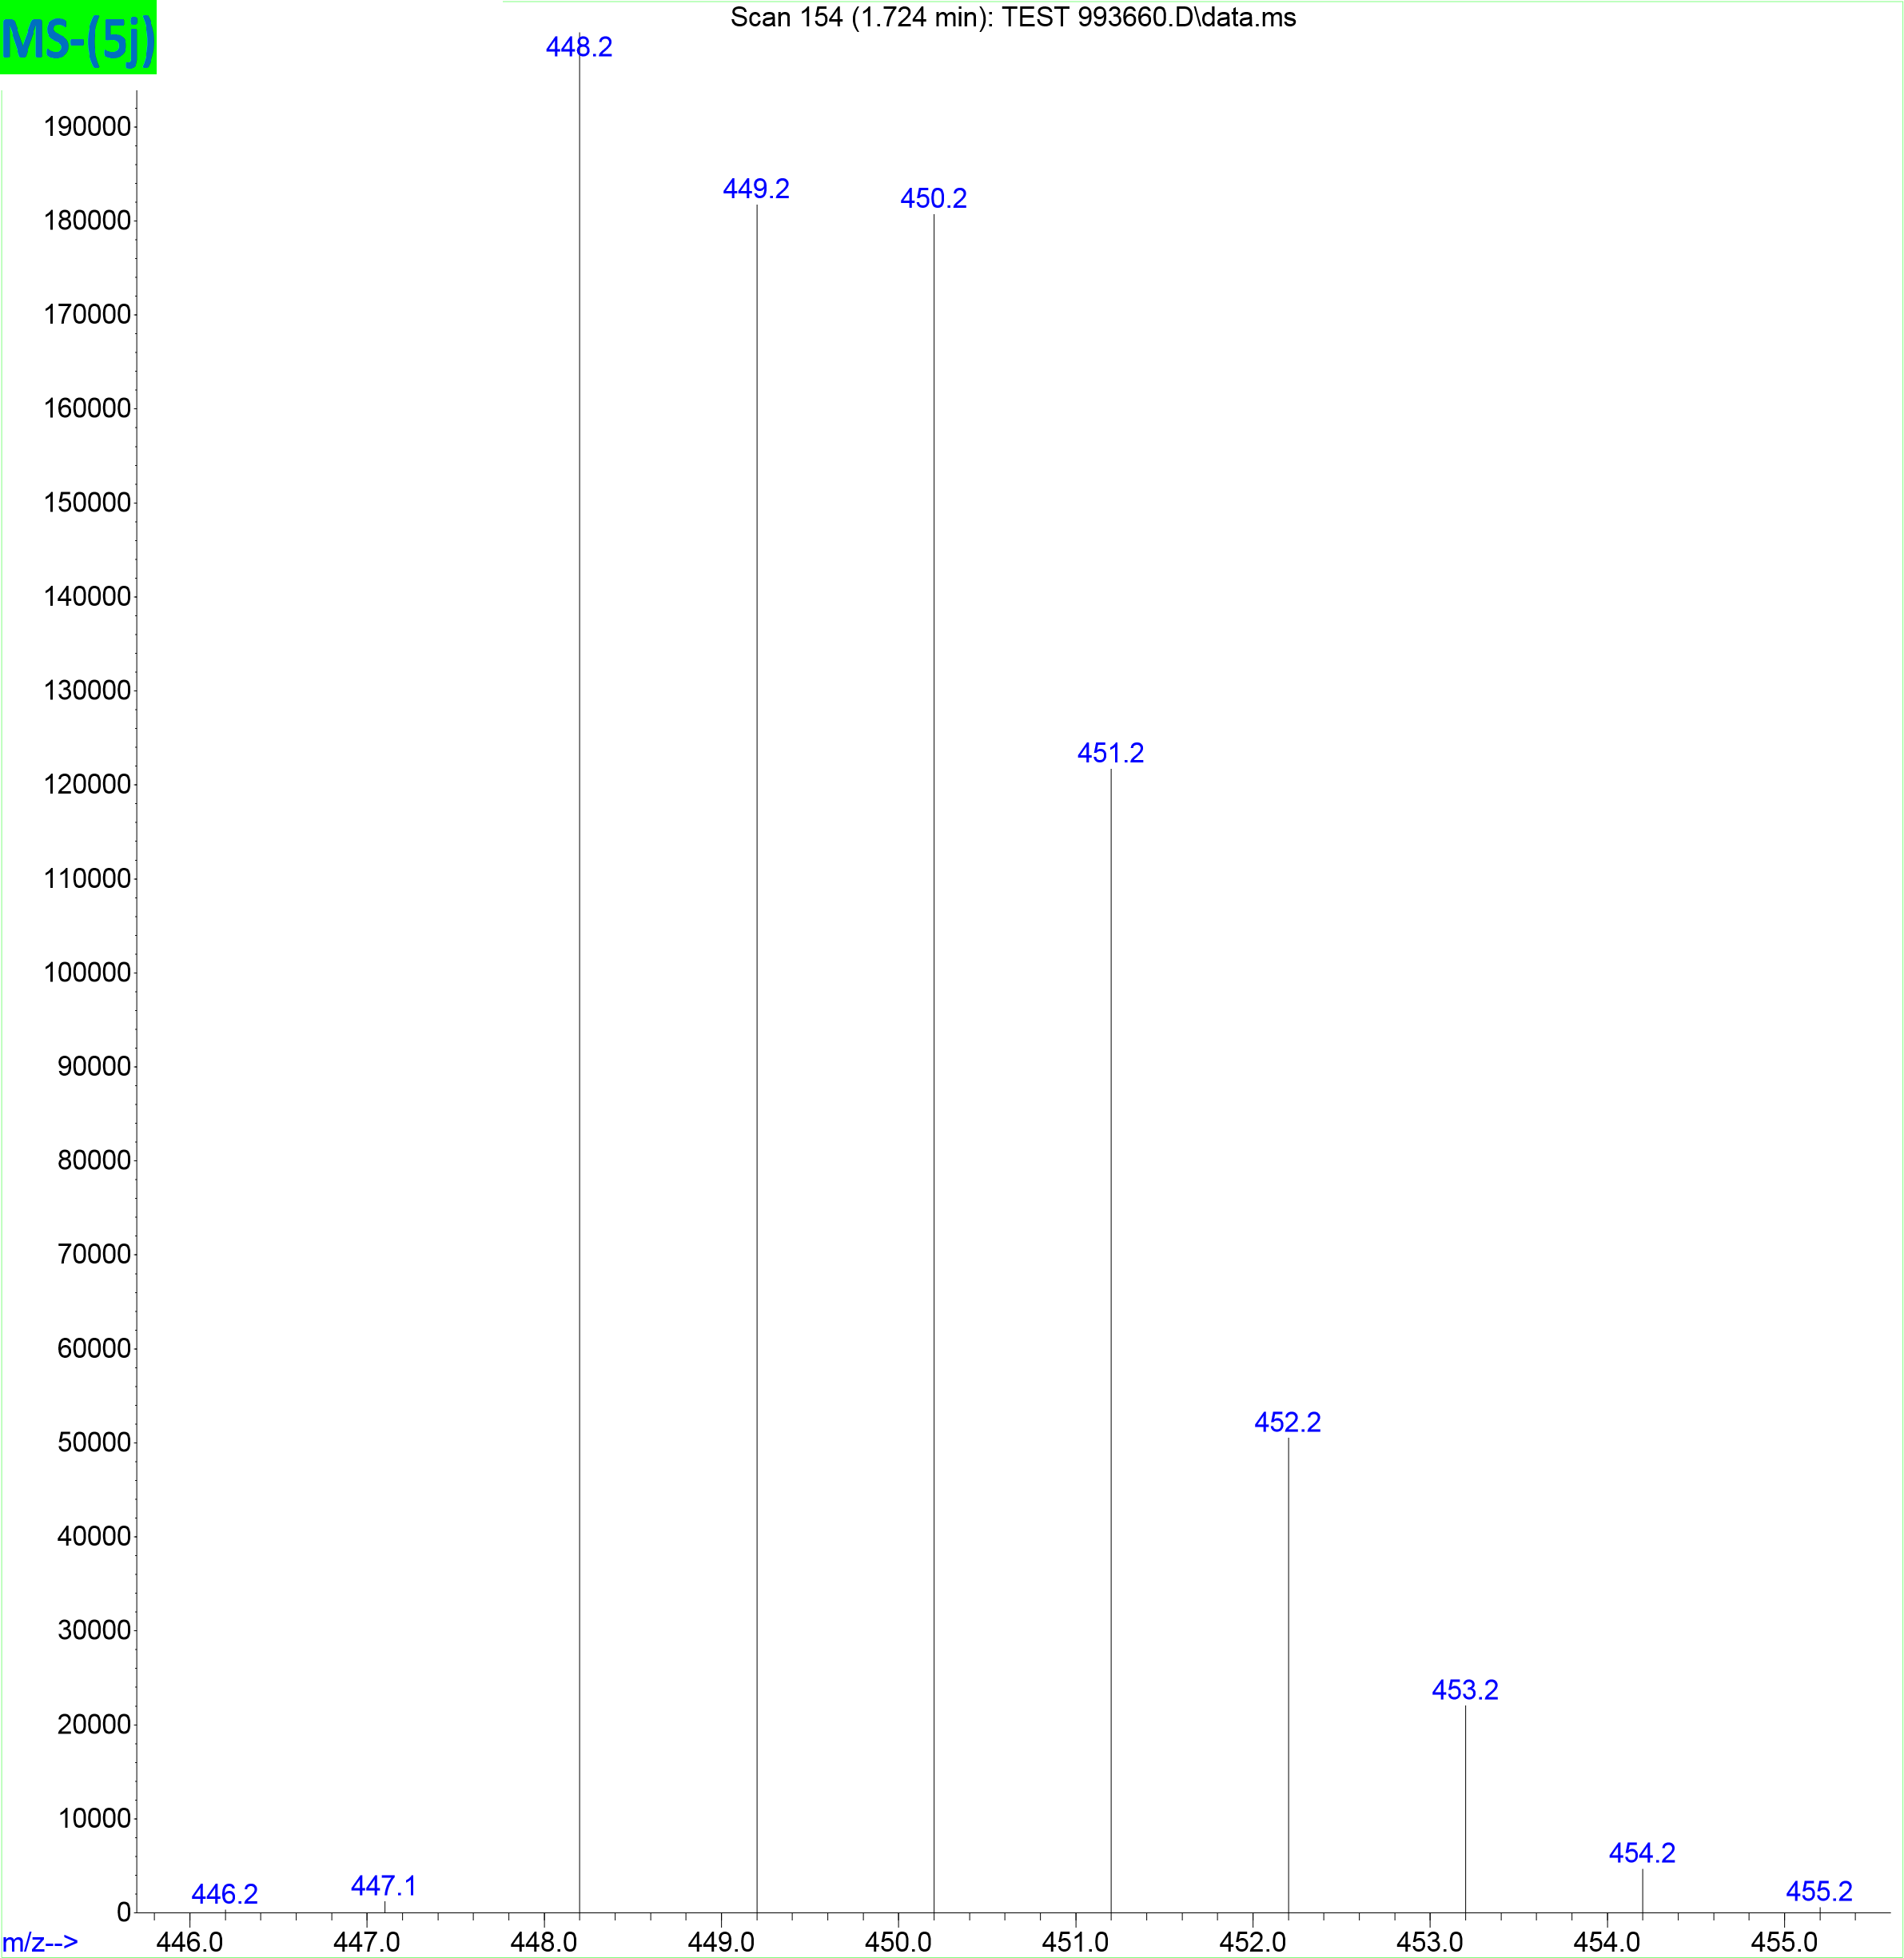

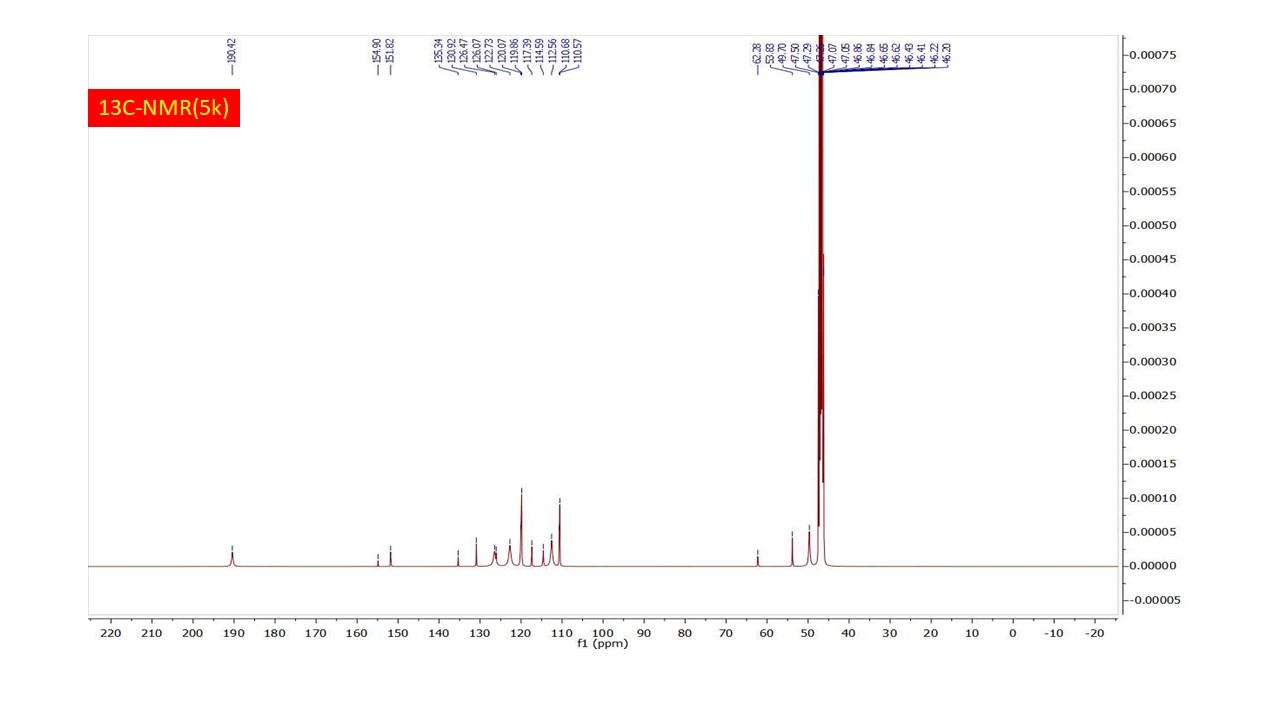

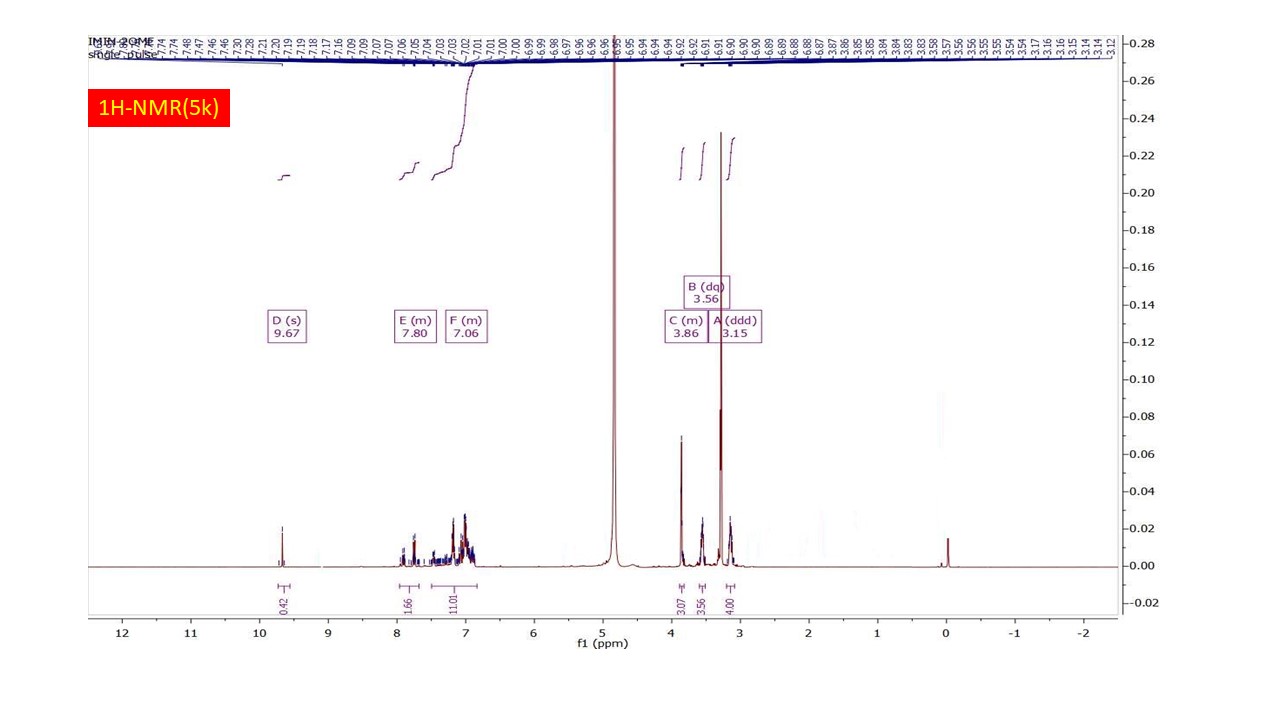

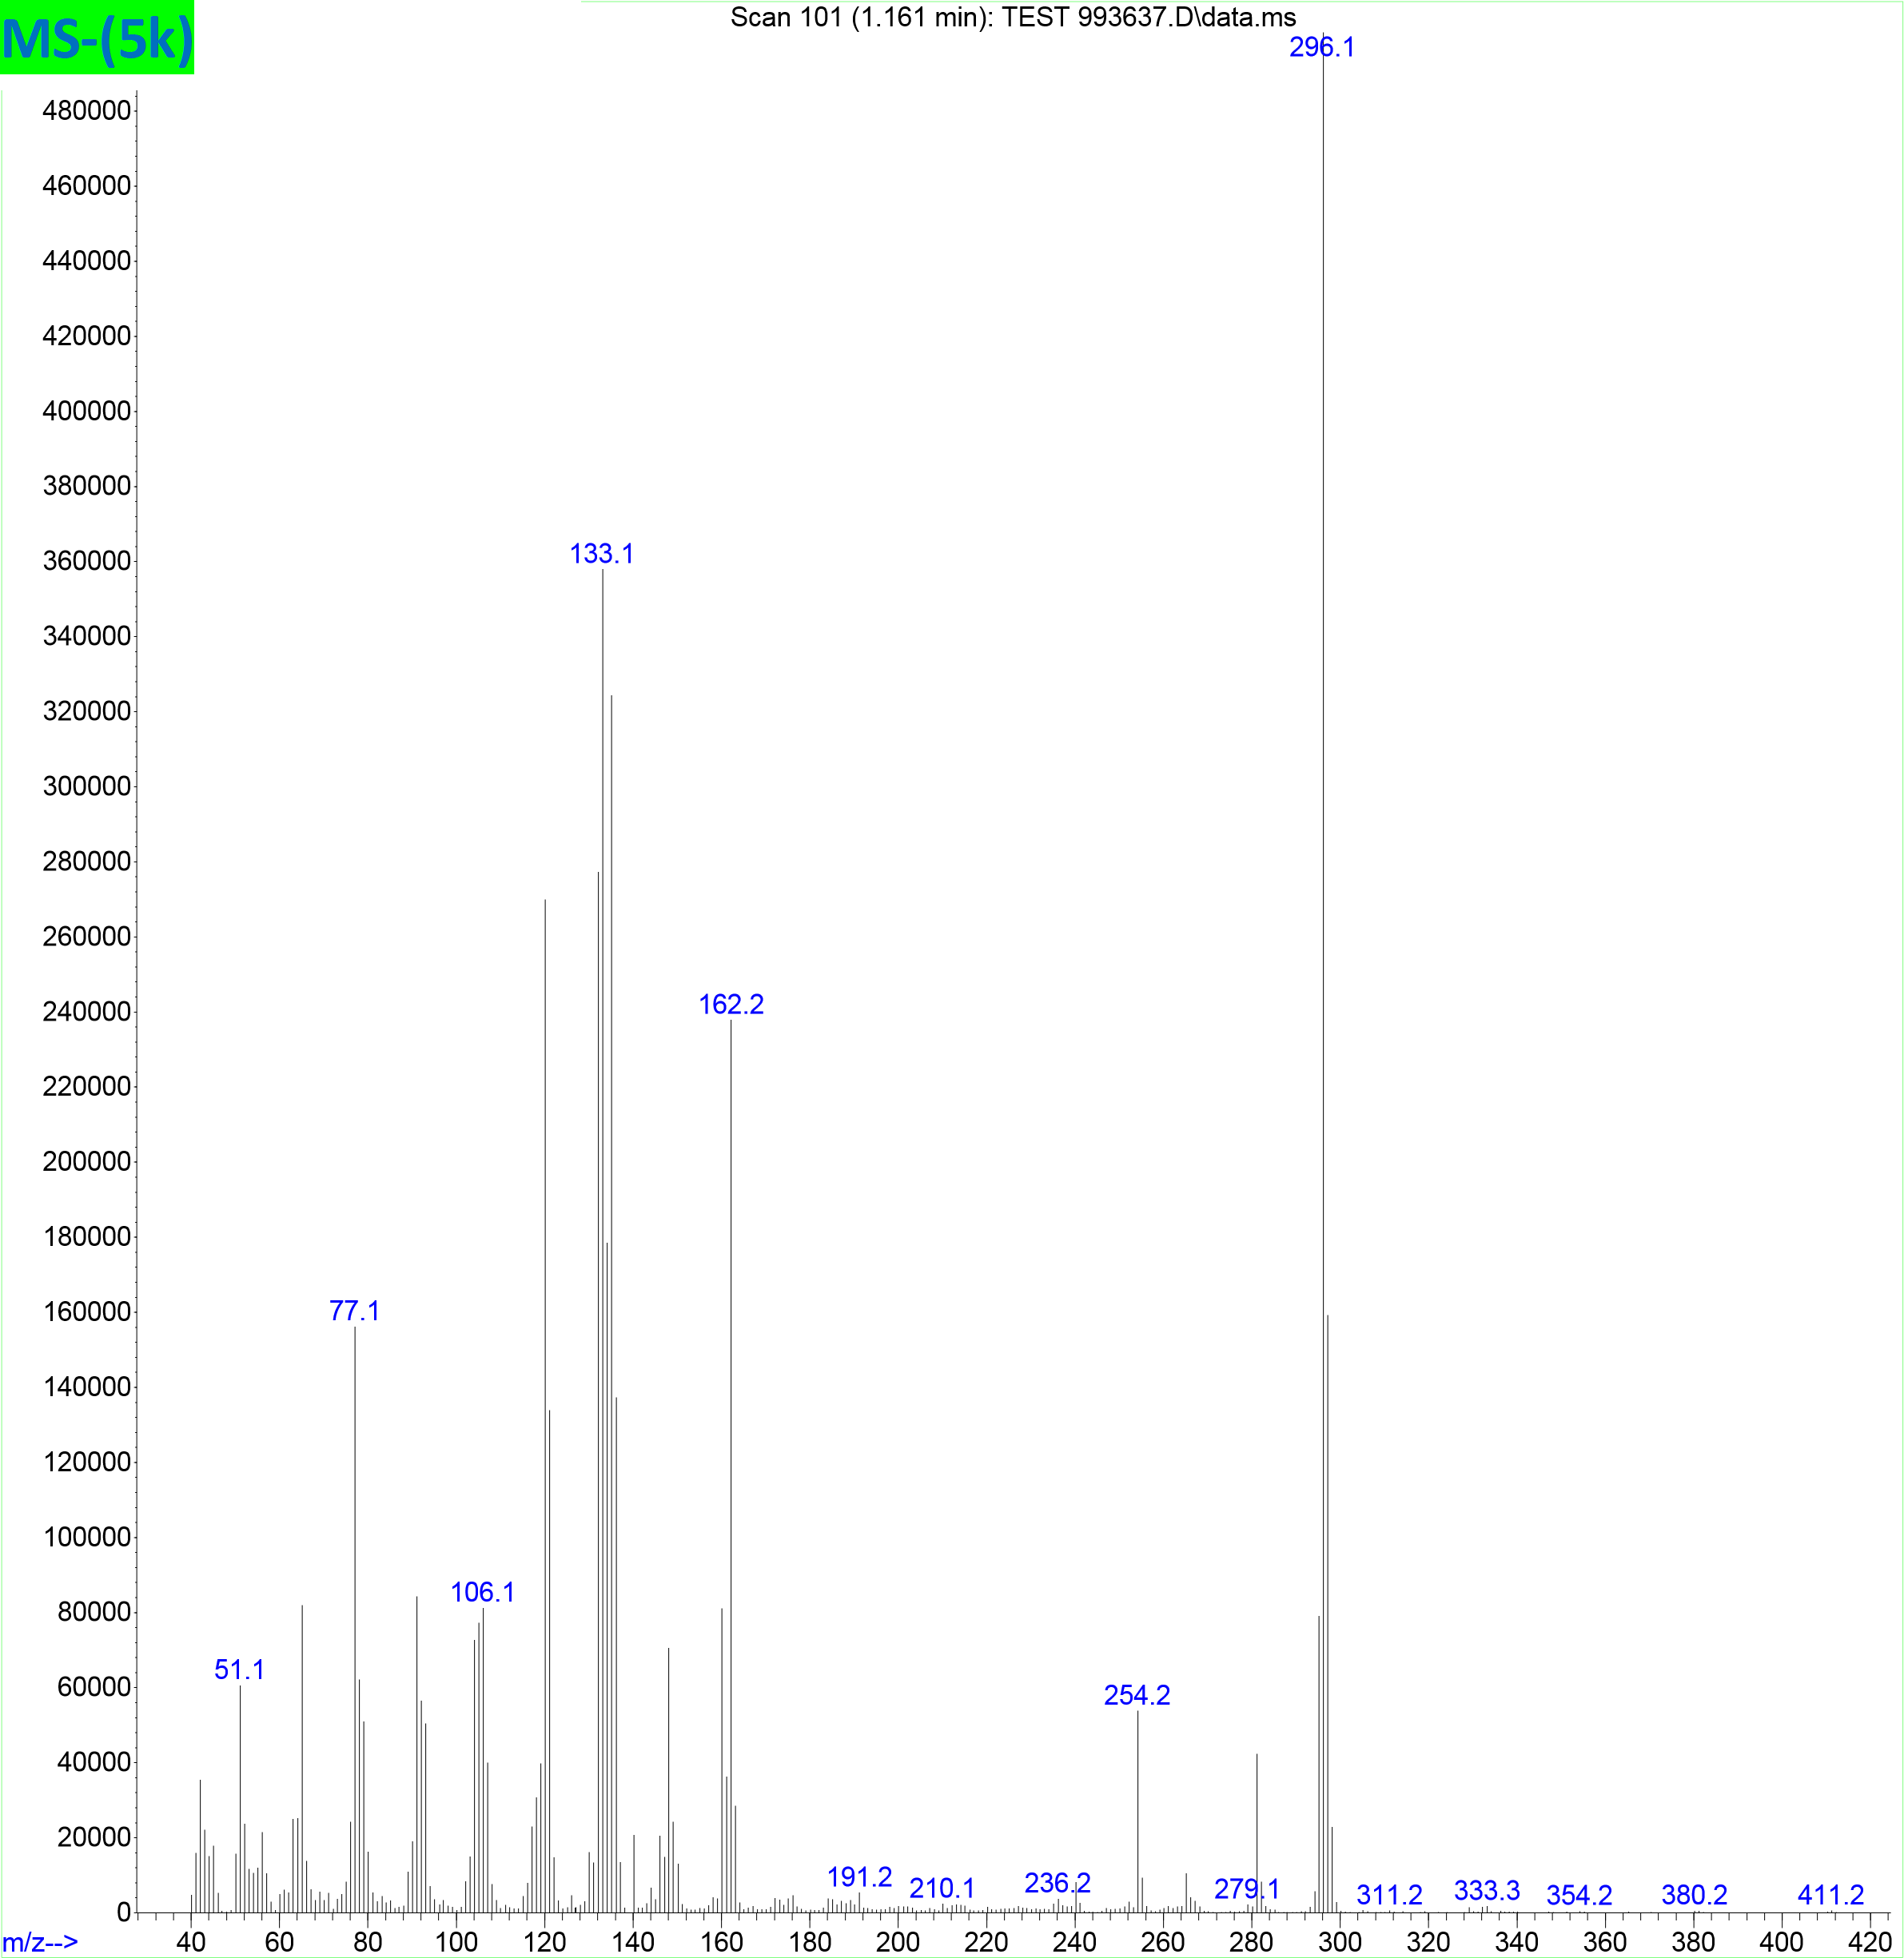

Supplement: Supplementary file 1 [file 31585445]
